# Supplementary material for: Computational Analysis of Candidate Disease Genes and Variants for Salt-Sensitive Hypertension in Indigenous Southern Africans
Source: PubMed Central journal article supplement (PMC2946338; doi:10.1371/journal.pone.0012989), 2010-09-27

**Supplementary Data File S-6:** Heatmaps showing copy number variation analysis for candidate genes. Red shading shows a deletion at that position, blue shading shows a copy number gain at that position. HUGO gene symbol is shown. Chrm = chromosome. Green lines denote the gene start and end. Horizontal axis shows position on the chromosome. Vertical axis shows the individuals from each population: CEU = HapMap Central European population, XHS = Xhosa population, HER = Herero population, STS = Setswana population, ZUL = Zulu population, KHS = Khoisan population.

## AGTR1 (Chrm 3)

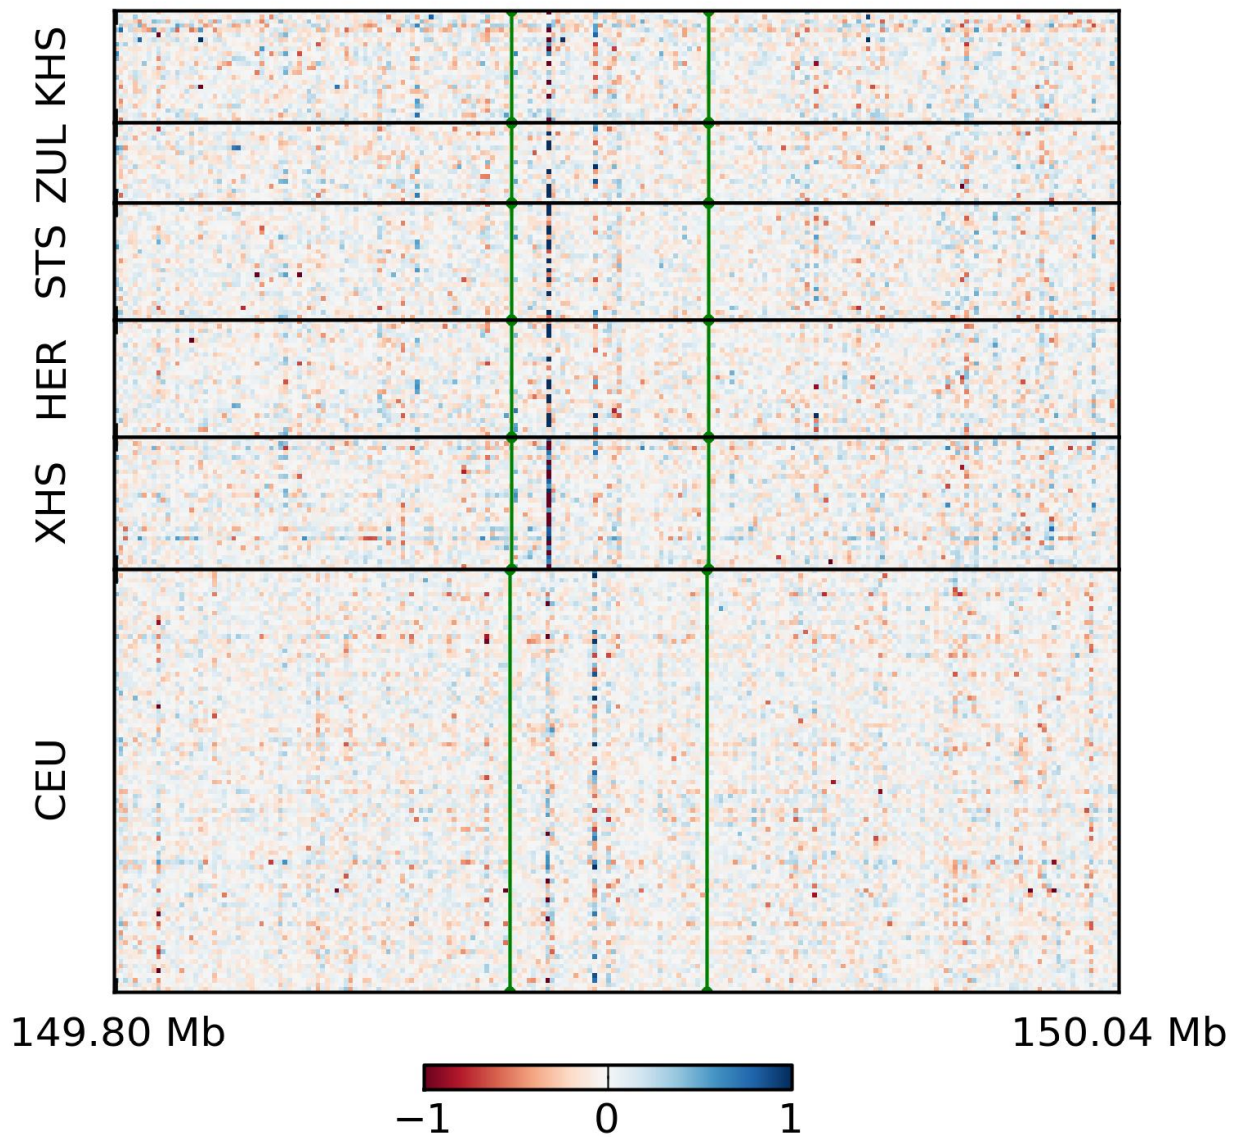

# INS (Chrm 11)

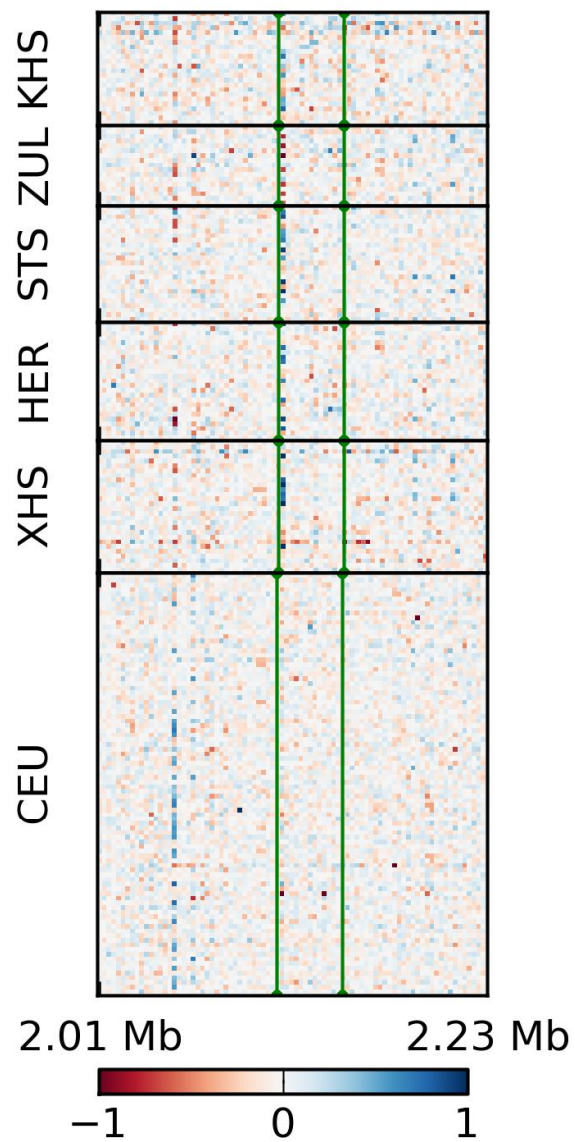

# EDNRA (Chrm 4)

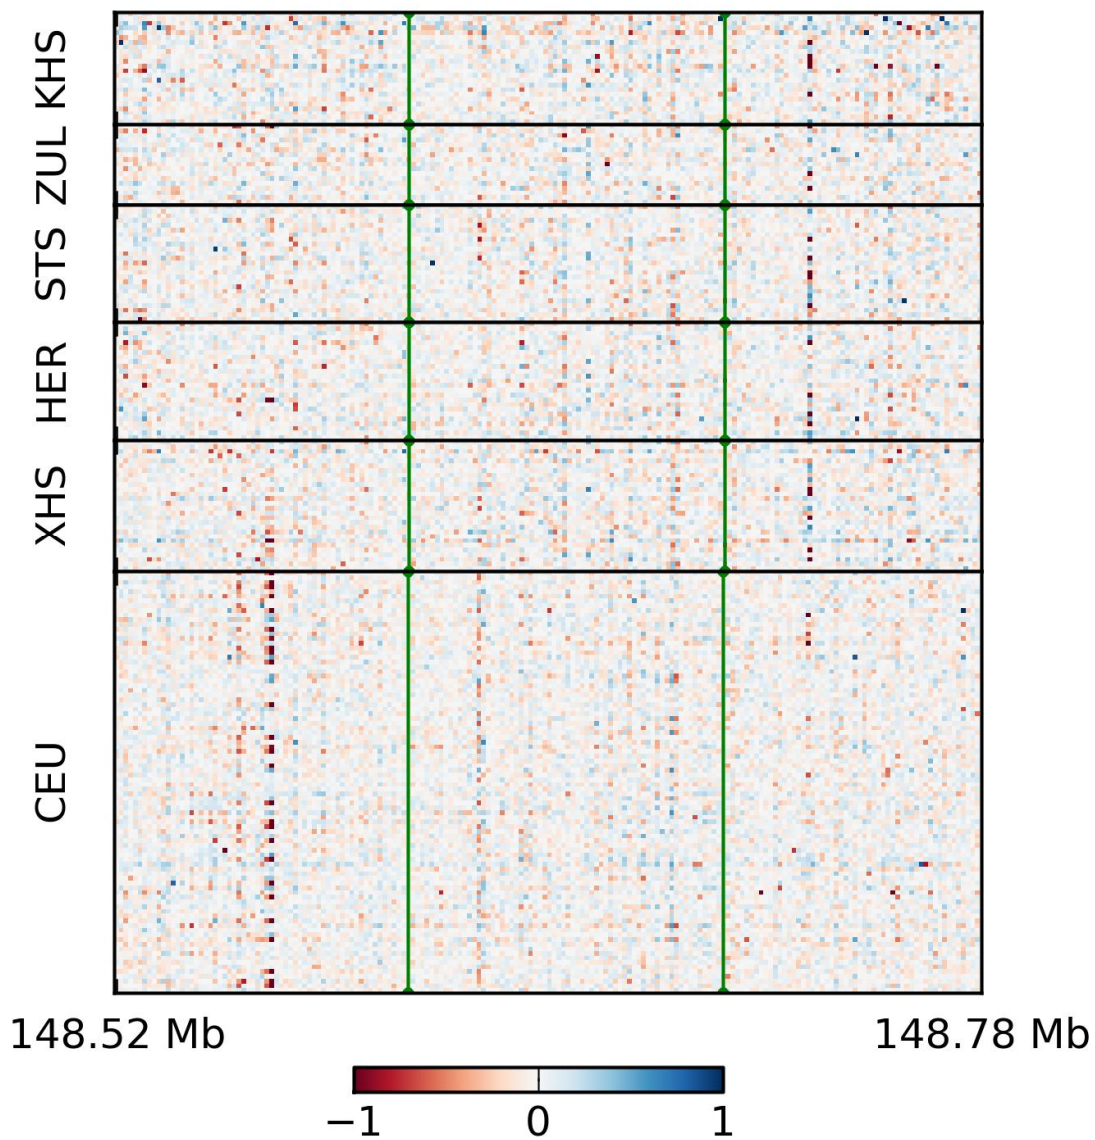

# EDNRB (Chrm 13)

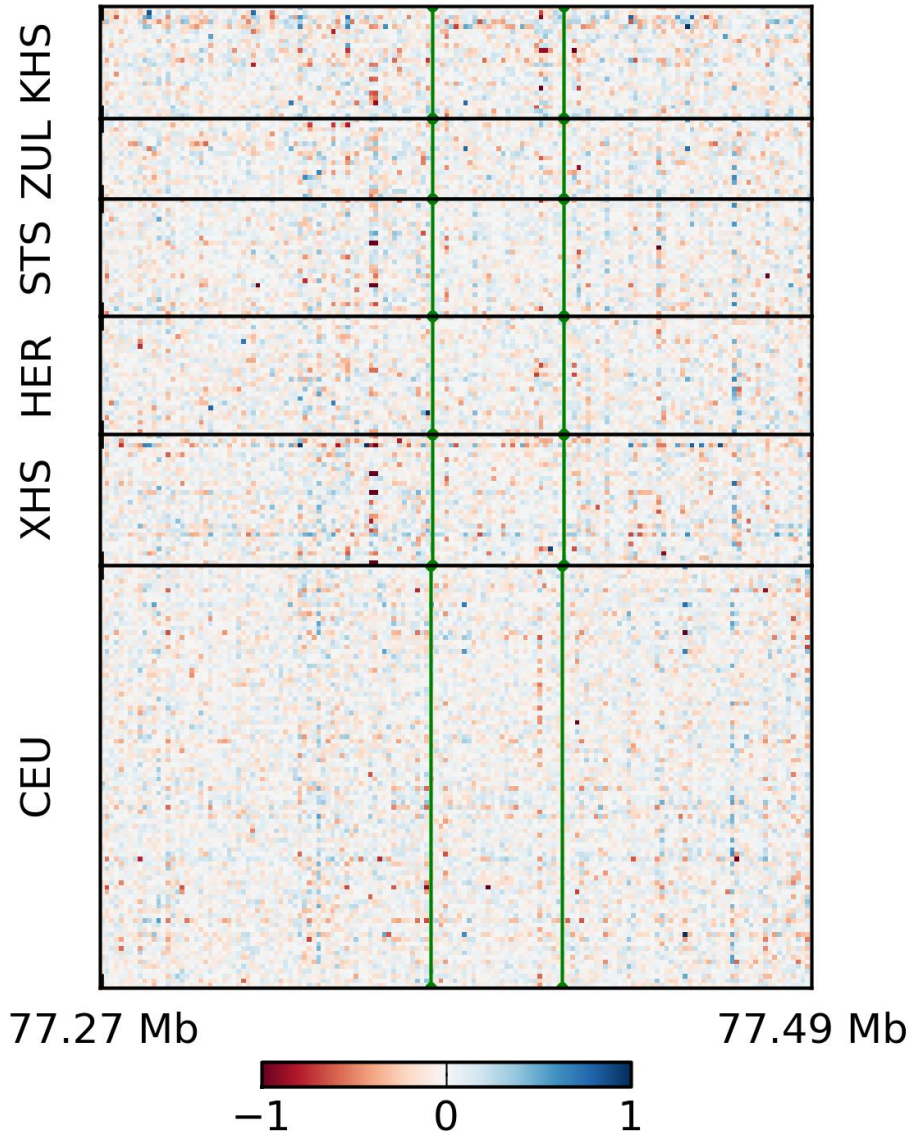

# AGT (Chrm 1)

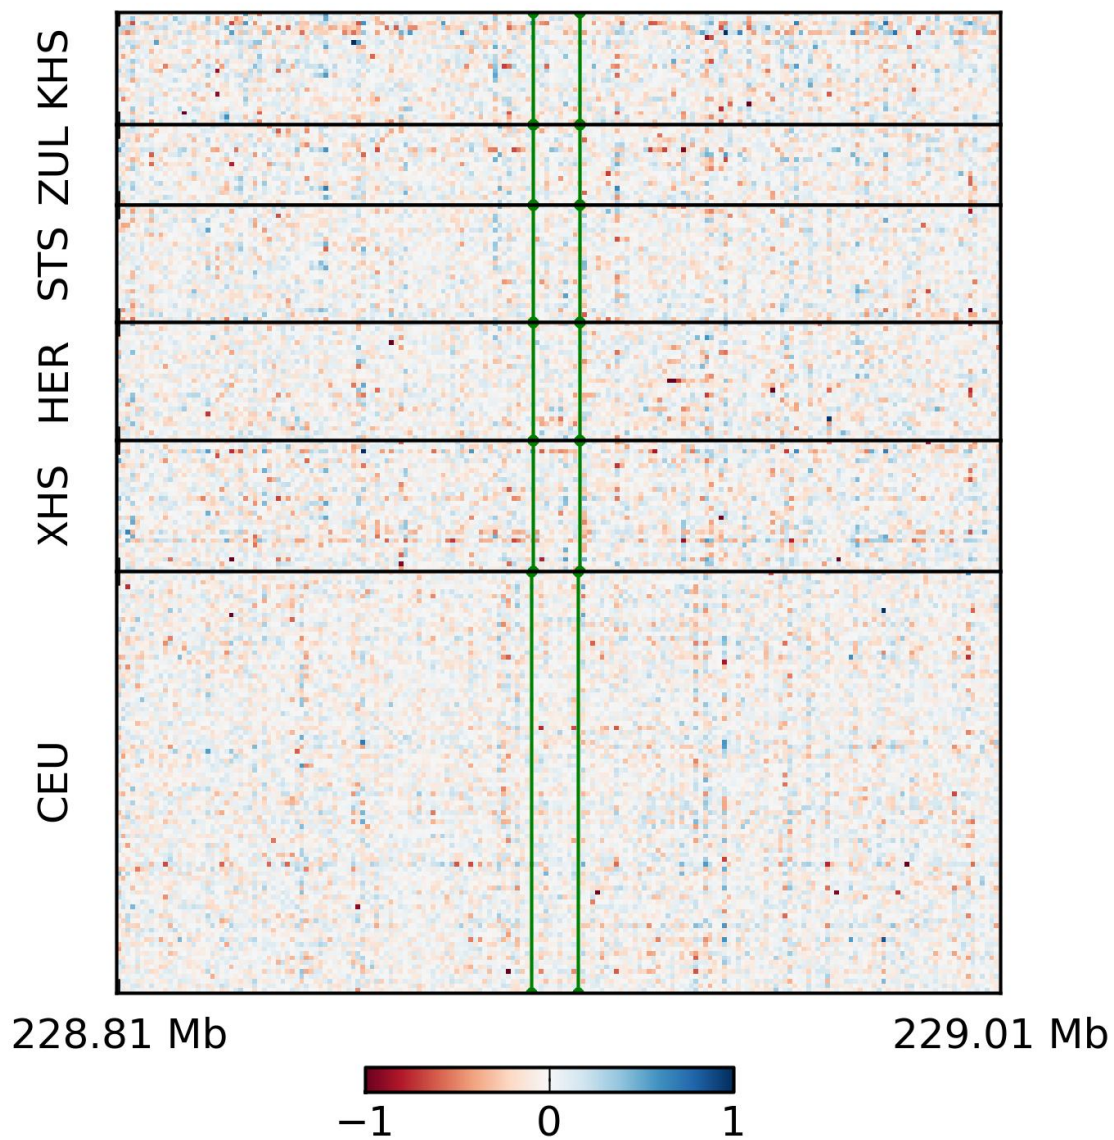

# REN (Chrm 1)

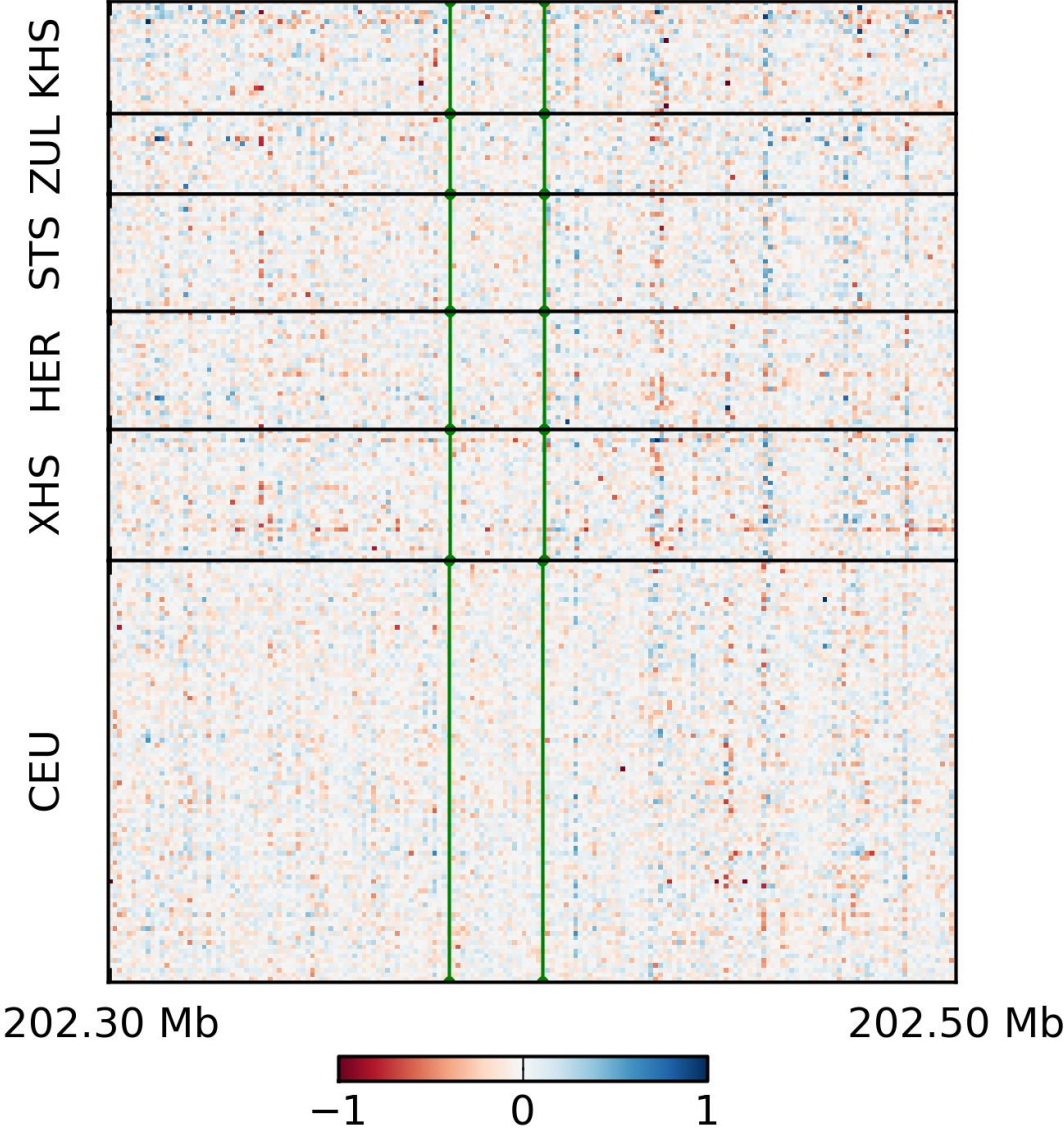

# HCN2 (Chrm 19)

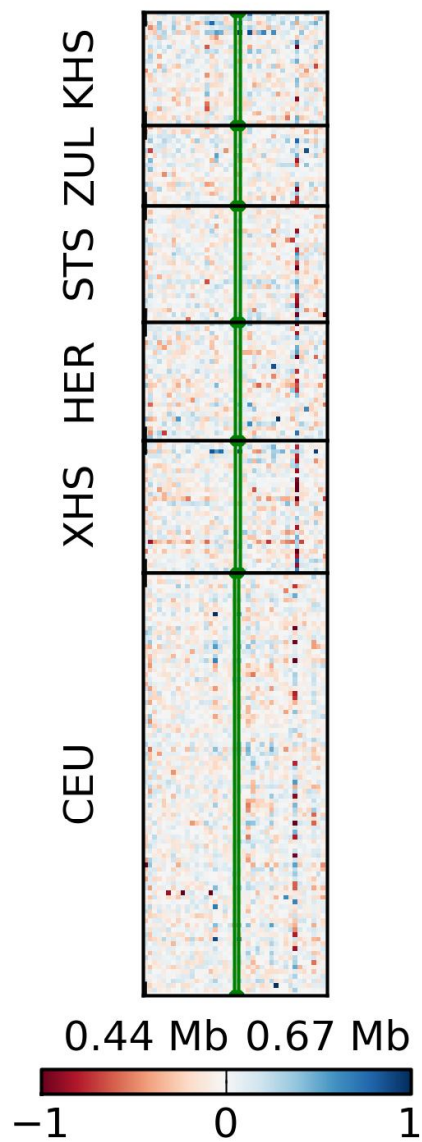

# HCN4 (Chrm 15)

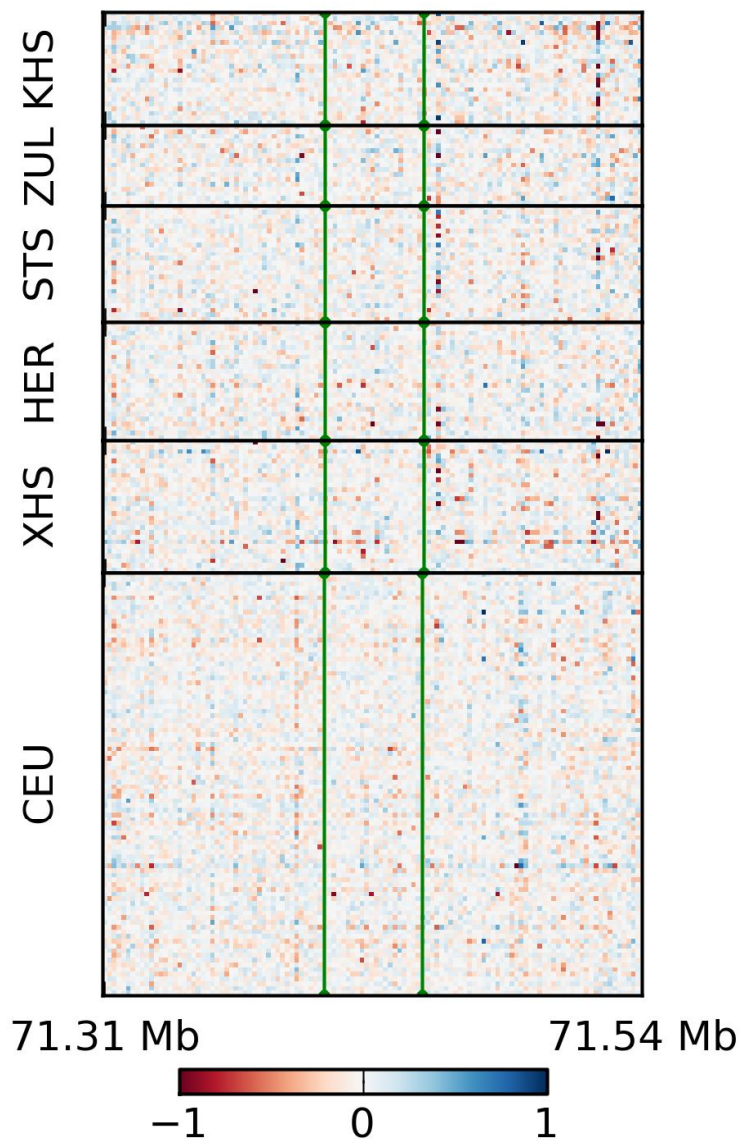



# EDN1 (Chrm 6)

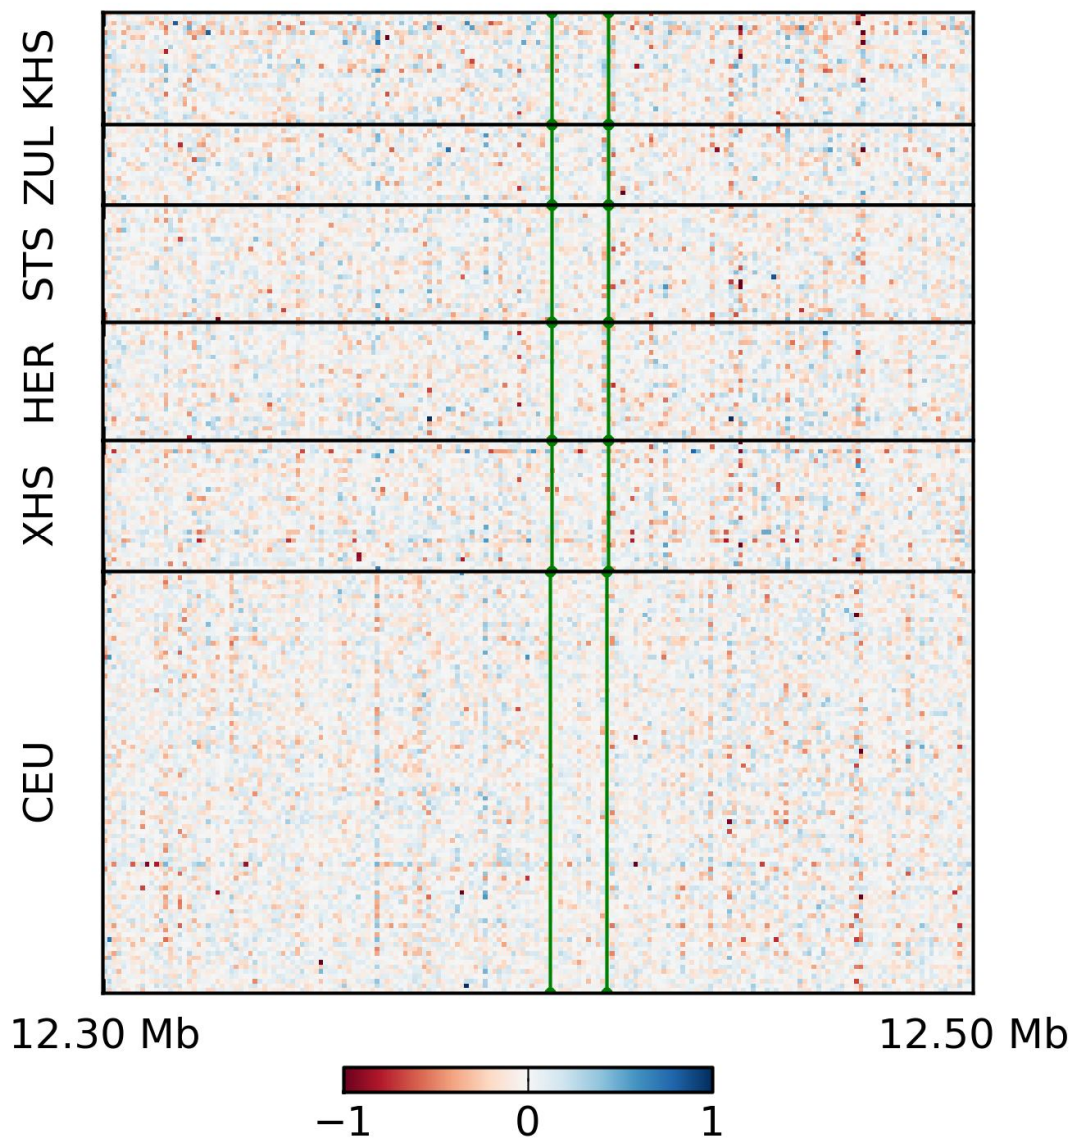

# ANG (Chrm 14)

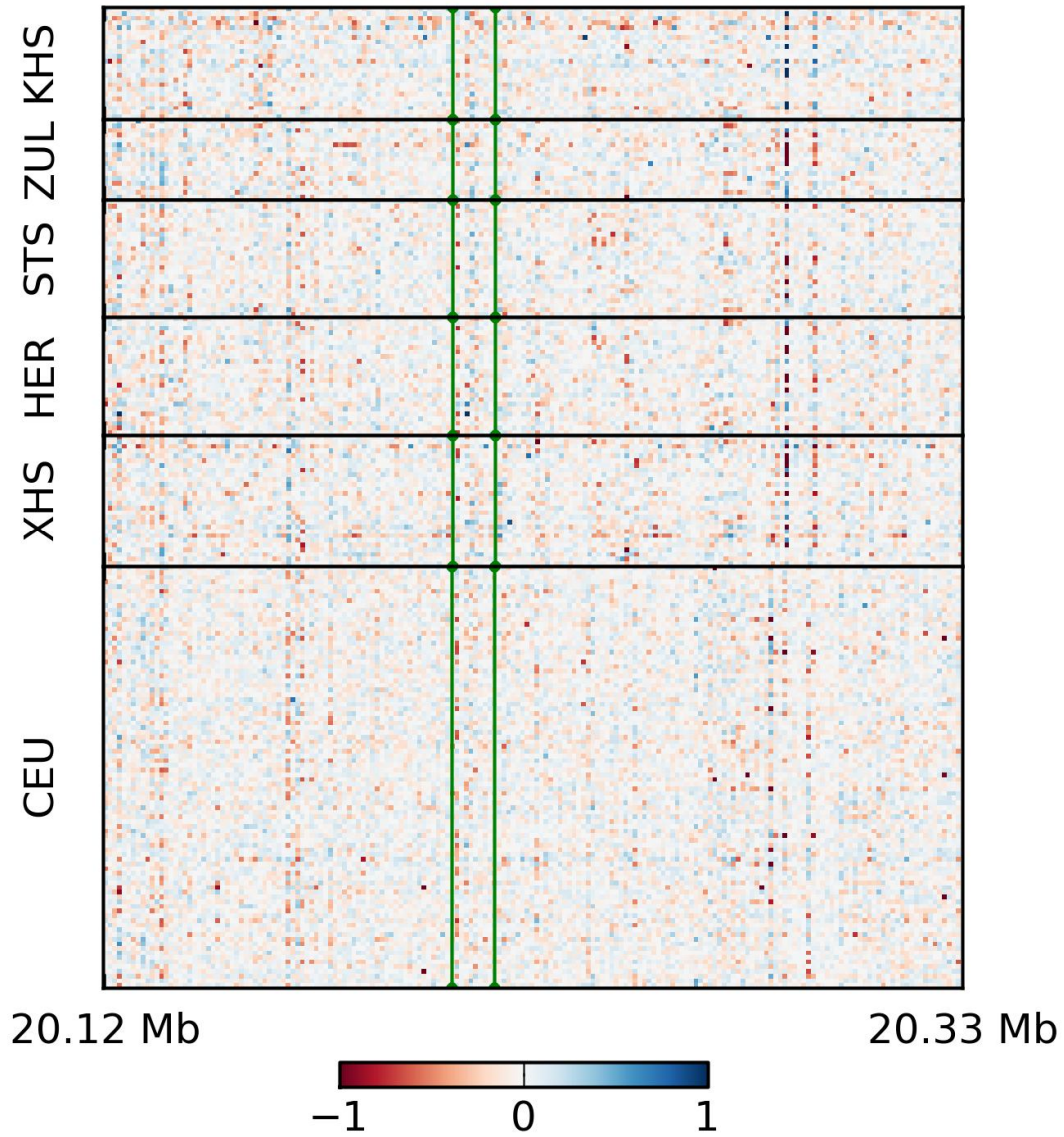

# REN (Chrm 1)

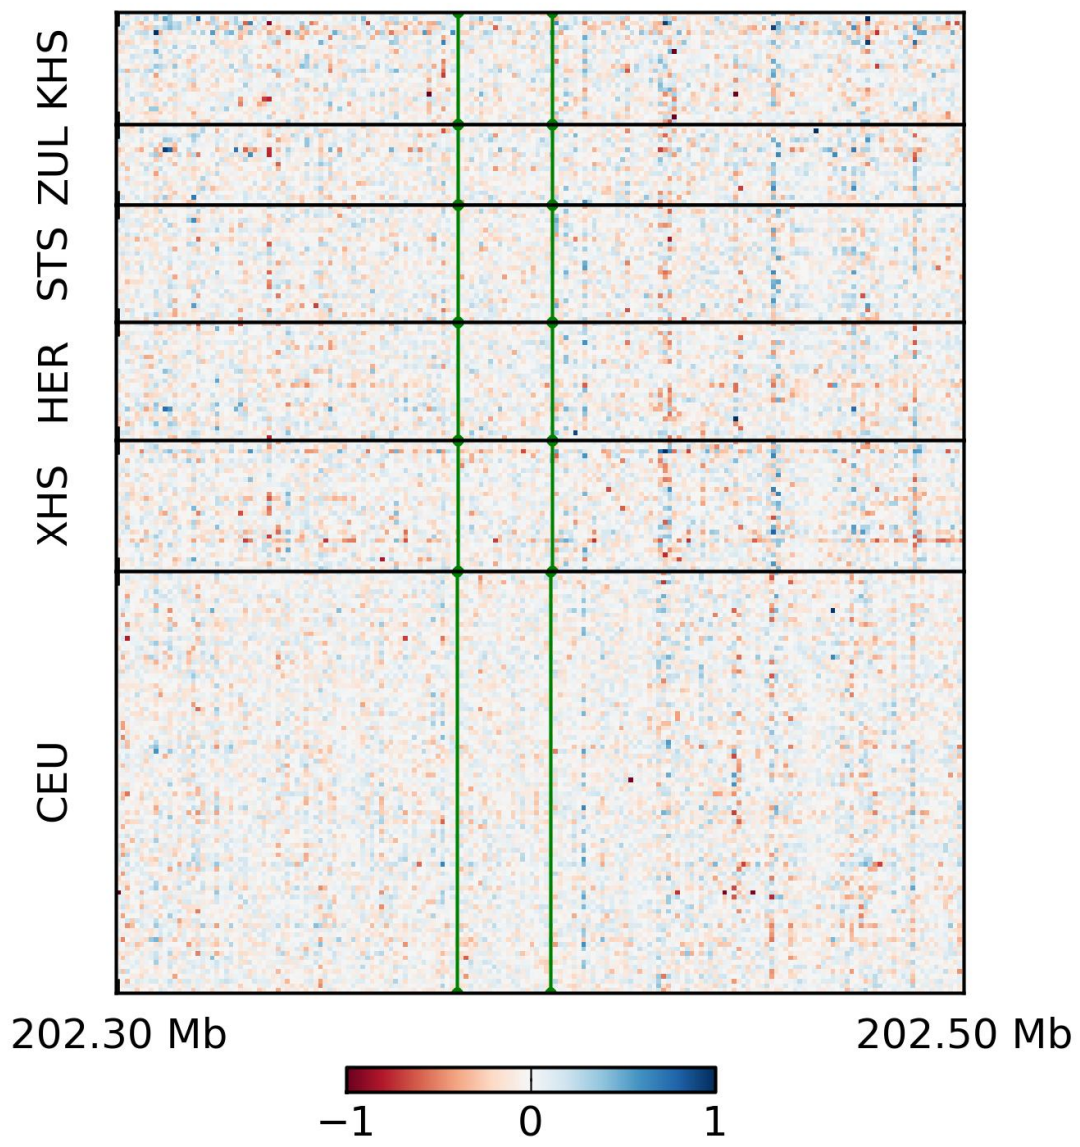

# PTH (Chrm 11)

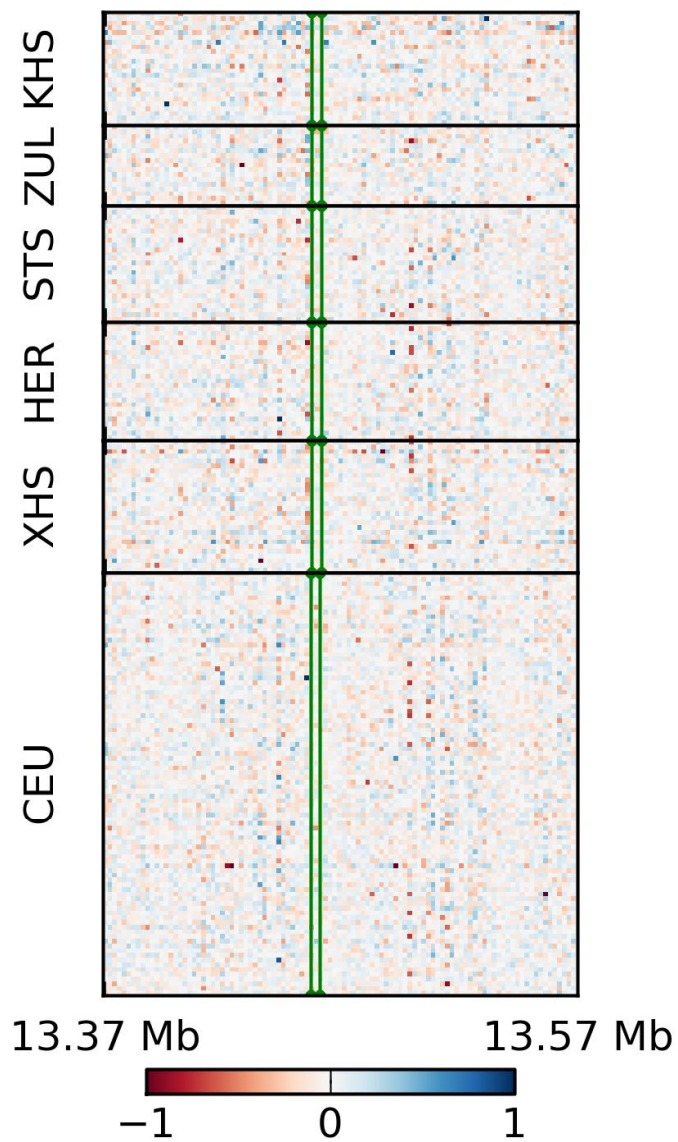

# NPPA (Chrm 1)

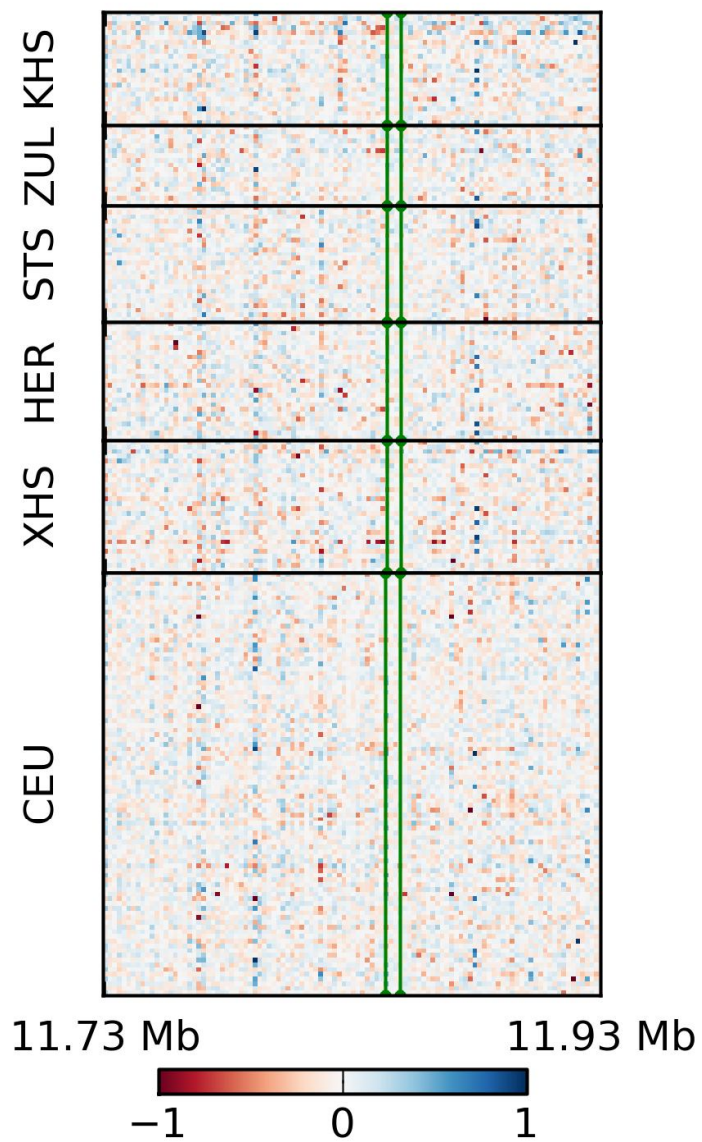

Supplement: pone.0012989.s006.pdf [file pone.0012989.s006.pdf]
