# Supplementary material for: Computational Analysis of Candidate Disease Genes and Variants for Salt-Sensitive Hypertension in Indigenous Southern Africans
Source: PubMed Central journal article supplement (PMC2946338; doi:10.1371/journal.pone.0012989), 2010-09-27
Supplement: pone.0012989.s002.pdf [file pone.0012989.s002.pdf]

**Supplementary data file S2: All SNPs assayed**

| Gene Symbol | dbSNP ID   | Affymetrix ID    | Allele1 | Allele2 | Chromosome | Gene_start | Gene_end  | SNP position |
|-------------|------------|------------------|---------|---------|------------|------------|-----------|--------------|
| ACE         | rs1029765  | SNP_A-1866325    | A       | G       | 17         | 58808166   | 59052935  | 58813016     |
| ACE         | rs17760841 | SNP_A-8562735    | C       | T       | 17         | 58808166   | 59052935  | 58826552     |
| ACE         | rs2270133  | SNP_A-1905032    | C       | A       | 17         | 58808166   | 59052935  | 58827057     |
| ACE         | rs16946910 | SNP_A-2130002    | A       | T       | 17         | 58808166   | 59052935  | 58833422     |
| ACE         | rs7211831  | SNP_A-8671801    | C       | G       | 17         | 58808166   | 59052935  | 58838237     |
| ACE         | rs2286571  | SNP_A-8300574    | T       | G       | 17         | 58808166   | 59052935  | 58871952     |
| ACE         | rs4968775  | SNP_A-4273894    | C       | G       | 17         | 58808166   | 59052935  | 58872498     |
| ACE         | rs9896864  | SNP_A-2292157    | A       | G       | 17         | 58808166   | 59052935  | 58890040     |
| ACE         | rs6504162  | SNP_A-4254119    | C       | T       | 17         | 58808166   | 59052935  | 58891134     |
| ACE         | rs9905945  | SNP_A-1881944    | T       | C       | 17         | 58808166   | 59052935  | 58892788     |
| ACE         | rs9912458  | SNP_A-8321661    | T       | C       | 17         | 58808166   | 59052935  | 58903970     |
| ACE         | rs4293     | SNP_A-2257238    | A       | G       | 17         | 58808166   | 59052935  | 58909398     |
| ACE         | rs4297     | SNP_A-8509652    | C       | G       | 17         | 58808166   | 59052935  | 58910286     |
| ACE         | rs12709426 | SNP_A-2245620    | G       | A       | 17         | 58808166   | 59052935  | 58915488     |
| ACE         | rs4324     | SNP_A-8557538    | G       | A       | 17         | 58808166   | 59052935  | 58916903     |
| ACE         | rs4325     | SNP_A-8560002    | C       | A       | 17         | 58808166   | 59052935  | 58916932     |
| ACE         | rs4329     | SNP_A-8527087    | G       | A       | 17         | 58808166   | 59052935  | 58917190     |
| ACE         | rs12709430 | SNP_A-2068378    | A       | G       | 17         | 58808166   | 59052935  | 58918801     |
| ACE         | rs4343     | SNP_A-8680186    | G       | A       | 17         | 58808166   | 59052935  | 58919763     |
| ACE         | rs13306091 | SNP_A-8689846    | C       | T       | 17         | 58808166   | 59052935  | 58920067     |
| ACE         | rs12709435 | SNP_A-4231379    | A       | G       | 17         | 58808166   | 59052935  | 58922752     |
| ACE         | rs4349     | SNP_A-8293739    | T       | C       | 17         | 58808166   | 59052935  | 58922876     |
| ACE         | rs4351     | SNP_A-4214465    | A       | G       | 17         | 58808166   | 59052935  | 58923464     |
| ACE         | rs4351     | AFFX-SNP_3894260 | A       | G       | 17         | 58808166   | 59052935  | 58923464     |
| ACE         | rs8075924  | SNP_A-8610297    | C       | T       | 17         | 58808166   | 59052935  | 58936624     |
| ACE         | rs4267385  | SNP_A-2091532    | C       | T       | 17         | 58808166   | 59052935  | 58937488     |
| ACE         | rs4459610  | SNP_A-2235978    | A       | T       | 17         | 58808166   | 59052935  | 58938452     |
| ACE         | rs11658531 | SNP_A-8646558    | A       | G       | 17         | 58808166   | 59052935  | 58941524     |
| ACE         | rs8066114  | SNP_A-1910897    | G       | C       | 17         | 58808166   | 59052935  | 58943572     |
| ACE         | rs4611524  | SNP_A-2209783    | C       | T       | 17         | 58808166   | 59052935  | 58945384     |
| ACE         | rs11658641 | SNP_A-8609541    | T       | G       | 17         | 58808166   | 59052935  | 58964632     |
| ACE         | rs7224716  | SNP_A-8381931    | A       | G       | 17         | 58808166   | 59052935  | 58965125     |
| ACE         | rs7225568  | SNP_A-8642753    | C       | T       | 17         | 58808166   | 59052935  | 58965155     |
| ACE         | rs7221979  | SNP_A-8435306    | G       | A       | 17         | 58808166   | 59052935  | 58968249     |
| ACE         | rs12603614 | SNP_A-8292250    | G       | A       | 17         | 58808166   | 59052935  | 58976435     |
| ACE         | rs9896476  | SNP_A-8698448    | C       | G       | 17         | 58808166   | 59052935  | 58983424     |
| ACE         | rs12451850 | SNP_A-8512161    | C       | T       | 17         | 58808166   | 59052935  | 58986654     |
| ACE         | rs12601211 | SNP_A-2313311    | A       | G       | 17         | 58808166   | 59052935  | 58991153     |
| ACE         | rs8069188  | SNP_A-1798481    | C       | T       | 17         | 58808166   | 59052935  | 58991213     |
| ACE         | rs9906747  | SNP_A-2309791    | A       | T       | 17         | 58808166   | 59052935  | 58993426     |
| ACE         | rs17631394 | SNP_A-8490639    | A       | G       | 17         | 58808166   | 59052935  | 58999732     |
| ACE         | rs8077278  | SNP_A-8637189    | T       | G       | 17         | 58808166   | 59052935  | 59010772     |
| ACE         | rs17631783 | SNP_A-4243701    | T       | C       | 17         | 58808166   | 59052935  | 59041332     |
| ACE         | rs9904598  | SNP_A-2046136    | C       | T       | 17         | 58808166   | 59052935  | 59042560     |
| ACE         | rs9911426  | SNP_A-2166834    | G       | T       | 17         | 58808166   | 59052935  | 59042962     |
| AGT         | rs1359865  | SNP_A-8666757    | C       | A       | 1          | 228804897  | 229016564 | 228811901    |
| AGT         | rs11122554 | SNP_A-1828392    | T       | A       | 1          | 228804897  | 229016564 | 228812038    |
| AGT         | rs853463   | SNP_A-8666758    | T       | C       | 1          | 228804897  | 229016564 | 228812517    |
| AGT         | rs12058420 | SNP_A-2263791    | C       | G       | 1          | 228804897  | 229016564 | 228813609    |

|     |            |               |   |   |   |           |           |           |
|-----|------------|---------------|---|---|---|-----------|-----------|-----------|
| AGT | rs16852085 | SNP_A-2170858 | C | T | 1 | 228804897 | 229016564 | 228813913 |
| AGT | rs17659489 | SNP_A-2238501 | C | T | 1 | 228804897 | 229016564 | 228815868 |
| AGT | rs11122555 | SNP_A-2208047 | T | C | 1 | 228804897 | 229016564 | 228817306 |
| AGT | rs11122556 | SNP_A-2027723 | C | G | 1 | 228804897 | 229016564 | 228818932 |
| AGT | rs699900   | SNP_A-8714970 | C | G | 1 | 228804897 | 229016564 | 228822031 |
| AGT | rs1410138  | SNP_A-8462425 | T | C | 1 | 228804897 | 229016564 | 228823120 |
| AGT | rs714214   | SNP_A-8384171 | G | A | 1 | 228804897 | 229016564 | 228825228 |
| AGT | rs11122558 | SNP_A-2259741 | G | C | 1 | 228804897 | 229016564 | 228826766 |
| AGT | rs853470   | SNP_A-8550025 | G | A | 1 | 228804897 | 229016564 | 228826936 |
| AGT | rs4846997  | SNP_A-8511487 | T | C | 1 | 228804897 | 229016564 | 228834660 |
| AGT | rs4846998  | SNP_A-8377967 | T | A | 1 | 228804897 | 229016564 | 228834754 |
| AGT | rs11122561 | SNP_A-8557427 | T | A | 1 | 228804897 | 229016564 | 228837142 |
| AGT | rs7529178  | SNP_A-1874455 | C | T | 1 | 228804897 | 229016564 | 228839812 |
| AGT | rs4846863  | SNP_A-8597210 | G | A | 1 | 228804897 | 229016564 | 228839948 |
| AGT | rs12025651 | SNP_A-2160160 | G | A | 1 | 228804897 | 229016564 | 228840585 |
| AGT | rs11122564 | SNP_A-8486789 | A | C | 1 | 228804897 | 229016564 | 228840709 |
| AGT | rs1078198  | SNP_A-8529377 | T | C | 1 | 228804897 | 229016564 | 228841100 |
| AGT | rs1078197  | SNP_A-1820781 | T | C | 1 | 228804897 | 229016564 | 228841474 |
| AGT | rs16852125 | SNP_A-2195303 | G | A | 1 | 228804897 | 229016564 | 228842306 |
| AGT | rs4846999  | SNP_A-8525773 | A | G | 1 | 228804897 | 229016564 | 228845502 |
| AGT | rs11122565 | SNP_A-8321179 | T | G | 1 | 228804897 | 229016564 | 228845889 |
| AGT | rs1887492  | SNP_A-1855113 | G | A | 1 | 228804897 | 229016564 | 228846377 |
| AGT | rs1887491  | SNP_A-2292436 | G | C | 1 | 228804897 | 229016564 | 228846598 |
| AGT | rs1887490  | SNP_A-1850365 | G | A | 1 | 228804897 | 229016564 | 228846617 |
| AGT | rs3827743  | SNP_A-8501289 | G | A | 1 | 228804897 | 229016564 | 228847194 |
| AGT | rs4847000  | SNP_A-2314090 | G | A | 1 | 228804897 | 229016564 | 228848364 |
| AGT | rs3761952  | SNP_A-8677210 | A | C | 1 | 228804897 | 229016564 | 228850898 |
| AGT | rs3789638  | SNP_A-8326004 | G | C | 1 | 228804897 | 229016564 | 228851412 |
| AGT | rs3827744  | SNP_A-8566444 | C | T | 1 | 228804897 | 229016564 | 228853590 |
| AGT | rs9658890  | SNP_A-8480066 | G | A | 1 | 228804897 | 229016564 | 228860849 |
| AGT | rs2225146  | SNP_A-1792852 | G | A | 1 | 228804897 | 229016564 | 228862264 |
| AGT | rs2296802  | SNP_A-8561242 | G | A | 1 | 228804897 | 229016564 | 228865431 |
| AGT | rs16852184 | SNP_A-8666767 | A | G | 1 | 228804897 | 229016564 | 228872137 |
| AGT | rs16852189 | SNP_A-8666768 | G | A | 1 | 228804897 | 229016564 | 228872409 |
| AGT | rs6681346  | SNP_A-8444553 | A | T | 1 | 228804897 | 229016564 | 228877379 |
| AGT | rs1998997  | SNP_A-8667023 | T | C | 1 | 228804897 | 229016564 | 228880706 |
| AGT | rs1467670  | SNP_A-2000761 | G | T | 1 | 228804897 | 229016564 | 228884482 |
| AGT | rs3789651  | SNP_A-4276470 | A | G | 1 | 228804897 | 229016564 | 228884927 |
| AGT | rs2479130  | SNP_A-8705721 | A | G | 1 | 228804897 | 229016564 | 228885034 |
| AGT | rs3789653  | SNP_A-2143656 | G | A | 1 | 228804897 | 229016564 | 228885248 |
| AGT | rs2479131  | SNP_A-2053670 | T | G | 1 | 228804897 | 229016564 | 228885464 |
| AGT | rs3789654  | SNP_A-8511748 | C | A | 1 | 228804897 | 229016564 | 228886915 |
| AGT | rs2479135  | SNP_A-8646880 | G | A | 1 | 228804897 | 229016564 | 228886974 |
| AGT | rs2296798  | SNP_A-8580208 | G | A | 1 | 228804897 | 229016564 | 228887253 |
| AGT | rs2296799  | SNP_A-1961060 | T | C | 1 | 228804897 | 229016564 | 228888107 |
| AGT | ---        | SNP_A-4218265 | T | C | 1 | 228804897 | 229016564 | 228888619 |
| AGT | rs2493147  | SNP_A-8290630 | T | C | 1 | 228804897 | 229016564 | 228889526 |
| AGT | rs6656060  | SNP_A-8349714 | G | A | 1 | 228804897 | 229016564 | 228890416 |
| AGT | rs1051038  | SNP_A-8593508 | A | G | 1 | 228804897 | 229016564 | 228895762 |
| AGT | rs12059975 | SNP_A-8601007 | A | G | 1 | 228804897 | 229016564 | 228897681 |
| AGT | rs2493127  | SNP_A-2000763 | G | A | 1 | 228804897 | 229016564 | 228898816 |
| AGT | rs16852352 | SNP_A-8385805 | T | G | 1 | 228804897 | 229016564 | 228903409 |
| AGT | rs943580   | SNP_A-8321955 | G | A | 1 | 228804897 | 229016564 | 228903667 |
| AGT | rs10864770 | SNP_A-8494145 | A | G | 1 | 228804897 | 229016564 | 228904060 |
| AGT | rs11568046 | SNP_A-2077287 | A | G | 1 | 228804897 | 229016564 | 228904738 |
| AGT | rs1926723  | SNP_A-1794507 | C | T | 1 | 228804897 | 229016564 | 228906719 |

|     |            |               |   |   |   |           |           |           |
|-----|------------|---------------|---|---|---|-----------|-----------|-----------|
| AGT | rs2493129  | SNP_A-8301284 | A | G | 1 | 228804897 | 229016564 | 228907565 |
| AGT | rs11568035 | SNP_A-4287554 | C | T | 1 | 228804897 | 229016564 | 228911313 |
| AGT | rs11122576 | SNP_A-4289331 | C | T | 1 | 228804897 | 229016564 | 228913302 |
| AGT | rs11568030 | SNP_A-1938818 | T | C | 1 | 228804897 | 229016564 | 228913466 |
| AGT | rs11568026 | SNP_A-1840348 | A | G | 1 | 228804897 | 229016564 | 228914146 |
| AGT | rs11122577 | SNP_A-1843329 | A | C | 1 | 228804897 | 229016564 | 228914179 |
| AGT | rs11122578 | SNP_A-8412309 | A | G | 1 | 228804897 | 229016564 | 228914412 |
| AGT | rs11568023 | SNP_A-2296476 | A | G | 1 | 228804897 | 229016564 | 228914802 |
| AGT | rs5046     | SNP_A-8411139 | A | G | 1 | 228804897 | 229016564 | 228917021 |
| AGT | rs2071406  | SNP_A-1862100 | G | A | 1 | 228804897 | 229016564 | 228917264 |
| AGT | rs2071404  | SNP_A-4250141 | A | C | 1 | 228804897 | 229016564 | 228917563 |
| AGT | rs4028824  | SNP_A-8355095 | G | A | 1 | 228804897 | 229016564 | 228920764 |
| AGT | rs7555650  | SNP_A-2139551 | C | T | 1 | 228804897 | 229016564 | 228921622 |
| AGT | rs7549009  | SNP_A-4253515 | A | G | 1 | 228804897 | 229016564 | 228921694 |
| AGT | rs4628514  | SNP_A-2160373 | C | T | 1 | 228804897 | 229016564 | 228922741 |
| AGT | rs1926721  | SNP_A-8667039 | A | G | 1 | 228804897 | 229016564 | 228931453 |
| AGT | rs4847008  | SNP_A-4207551 | G | T | 1 | 228804897 | 229016564 | 228931849 |
| AGT | rs10864775 | SNP_A-8693889 | T | C | 1 | 228804897 | 229016564 | 228932842 |
| AGT | rs2478521  | SNP_A-8503049 | T | C | 1 | 228804897 | 229016564 | 228933737 |
| AGT | rs4846868  | SNP_A-2231833 | A | G | 1 | 228804897 | 229016564 | 228934296 |
| AGT | rs2478518  | SNP_A-1987929 | G | C | 1 | 228804897 | 229016564 | 228934493 |
| AGT | rs2478517  | SNP_A-2246438 | A | G | 1 | 228804897 | 229016564 | 228934510 |
| AGT | rs10864777 | SNP_A-1987931 | G | T | 1 | 228804897 | 229016564 | 228934686 |
| AGT | rs10495299 | SNP_A-4212027 | G | A | 1 | 228804897 | 229016564 | 228936260 |
| AGT | rs6663784  | SNP_A-8637895 | G | A | 1 | 228804897 | 229016564 | 228942330 |
| AGT | rs12409662 | SNP_A-8506363 | G | C | 1 | 228804897 | 229016564 | 228943423 |
| AGT | rs16852515 | SNP_A-1987938 | C | A | 1 | 228804897 | 229016564 | 228943767 |
| AGT | rs2478541  | SNP_A-8355356 | T | C | 1 | 228804897 | 229016564 | 228946575 |
| AGT | rs6662197  | SNP_A-8713625 | G | A | 1 | 228804897 | 229016564 | 228946778 |
| AGT | rs7540252  | SNP_A-8390324 | C | T | 1 | 228804897 | 229016564 | 228949072 |
| AGT | rs2493153  | SNP_A-1852552 | A | G | 1 | 228804897 | 229016564 | 228952814 |
| AGT | rs2478546  | SNP_A-8644374 | T | C | 1 | 228804897 | 229016564 | 228952888 |
| AGT | rs1887208  | SNP_A-8317648 | G | A | 1 | 228804897 | 229016564 | 228952994 |
| AGT | rs16852579 | SNP_A-1888430 | T | C | 1 | 228804897 | 229016564 | 228957896 |
| AGT | rs2493146  | SNP_A-2240688 | T | C | 1 | 228804897 | 229016564 | 228957956 |
| AGT | rs3790958  | SNP_A-8610339 | C | T | 1 | 228804897 | 229016564 | 228964347 |
| AGT | rs2282318  | SNP_A-2177257 | T | A | 1 | 228804897 | 229016564 | 228964854 |
| AGT | rs12121628 | SNP_A-8486413 | G | A | 1 | 228804897 | 229016564 | 228967379 |
| AGT | rs12059555 | SNP_A-8484089 | A | G | 1 | 228804897 | 229016564 | 228967649 |
| AGT | rs12059573 | SNP_A-8640604 | C | G | 1 | 228804897 | 229016564 | 228967721 |
| AGT | rs12027189 | SNP_A-8566730 | T | C | 1 | 228804897 | 229016564 | 228969629 |
| AGT | rs872504   | SNP_A-8524038 | C | T | 1 | 228804897 | 229016564 | 228970882 |
| AGT | rs4847017  | SNP_A-1815960 | C | T | 1 | 228804897 | 229016564 | 228972346 |
| AGT | rs4618981  | SNP_A-8652470 | T | A | 1 | 228804897 | 229016564 | 228972717 |
| AGT | rs16852607 | SNP_A-8453303 | C | T | 1 | 228804897 | 229016564 | 228973197 |
| AGT | rs3790971  | SNP_A-8460303 | G | A | 1 | 228804897 | 229016564 | 228973398 |
| AGT | rs6677009  | SNP_A-8709145 | C | T | 1 | 228804897 | 229016564 | 228973577 |
| AGT | rs12404010 | SNP_A-2066575 | G | A | 1 | 228804897 | 229016564 | 228973854 |
| AGT | rs4520425  | SNP_A-1836656 | C | T | 1 | 228804897 | 229016564 | 228973999 |
| AGT | rs3790972  | SNP_A-8667296 | A | G | 1 | 228804897 | 229016564 | 228975335 |
| AGT | rs16852647 | SNP_A-1809278 | A | G | 1 | 228804897 | 229016564 | 228976658 |
| AGT | rs7517389  | SNP_A-1805520 | A | G | 1 | 228804897 | 229016564 | 228976962 |
| AGT | rs7537410  | SNP_A-2304693 | A | G | 1 | 228804897 | 229016564 | 228979103 |
| AGT | rs12068313 | SNP_A-2200739 | G | A | 1 | 228804897 | 229016564 | 228979241 |
| AGT | rs11122597 | SNP_A-2256835 | A | G | 1 | 228804897 | 229016564 | 228979807 |
| AGT | rs11122598 | SNP_A-4274419 | G | A | 1 | 228804897 | 229016564 | 228979994 |

|       |            |               |   |   |   |           |           |           |
|-------|------------|---------------|---|---|---|-----------|-----------|-----------|
| AGT   | rs12757624 | SNP_A-2179822 | A | G | 1 | 228804897 | 229016564 | 228980744 |
| AGT   | rs11804774 | SNP_A-4248922 | G | C | 1 | 228804897 | 229016564 | 228986530 |
| AGT   | rs12038826 | SNP_A-8610065 | C | T | 1 | 228804897 | 229016564 | 228989574 |
| AGT   | rs12731961 | SNP_A-8357795 | T | C | 1 | 228804897 | 229016564 | 228989936 |
| AGT   | rs6661547  | SNP_A-2077606 | G | A | 1 | 228804897 | 229016564 | 228992087 |
| AGT   | rs11584791 | SNP_A-8301273 | A | G | 1 | 228804897 | 229016564 | 228992680 |
| AGT   | rs2282321  | SNP_A-8631891 | T | C | 1 | 228804897 | 229016564 | 228994974 |
| AGT   | rs16852681 | SNP_A-1898392 | A | G | 1 | 228804897 | 229016564 | 228995050 |
| AGT   | rs3828128  | SNP_A-8585172 | A | G | 1 | 228804897 | 229016564 | 228995933 |
| AGT   | rs11808288 | SNP_A-4249842 | A | G | 1 | 228804897 | 229016564 | 229002027 |
| AGT   | rs6667160  | SNP_A-8439835 | G | A | 1 | 228804897 | 229016564 | 229003393 |
| AGT   | rs4847020  | SNP_A-8513060 | G | A | 1 | 228804897 | 229016564 | 229008833 |
| AGT   | rs11122610 | SNP_A-2115458 | C | A | 1 | 228804897 | 229016564 | 229010982 |
| AGT   | rs16852707 | SNP_A-2115199 | G | A | 1 | 228804897 | 229016564 | 229011805 |
| AGT   | rs1202519  | SNP_A-4226170 | T | C | 1 | 228804897 | 229016564 | 229013763 |
| AGTR1 | rs1522940  | SNP_A-2255411 | C | A | 3 | 149798355 | 150043478 | 149798377 |
| AGTR1 | rs1357424  | SNP_A-8619402 | T | C | 3 | 149798355 | 150043478 | 149801516 |
| AGTR1 | rs2687661  | SNP_A-2278432 | T | A | 3 | 149798355 | 150043478 | 149801923 |
| AGTR1 | rs932226   | SNP_A-8500125 | A | G | 3 | 149798355 | 150043478 | 149817089 |
| AGTR1 | rs6803324  | SNP_A-2211885 | T | C | 3 | 149798355 | 150043478 | 149817720 |
| AGTR1 | rs188019   | SNP_A-8365965 | A | G | 3 | 149798355 | 150043478 | 149818887 |
| AGTR1 | rs1357426  | SNP_A-8376958 | G | A | 3 | 149798355 | 150043478 | 149824969 |
| AGTR1 | rs1357427  | SNP_A-8488170 | T | C | 3 | 149798355 | 150043478 | 149825145 |
| AGTR1 | rs11718532 | SNP_A-8484648 | A | C | 3 | 149798355 | 150043478 | 149826480 |
| AGTR1 | rs1403432  | SNP_A-8696218 | C | T | 3 | 149798355 | 150043478 | 149826710 |
| AGTR1 | rs275690   | SNP_A-2207374 | C | T | 3 | 149798355 | 150043478 | 149828216 |
| AGTR1 | rs11715970 | SNP_A-8427405 | A | G | 3 | 149798355 | 150043478 | 149829360 |
| AGTR1 | rs275696   | SNP_A-8375847 | A | G | 3 | 149798355 | 150043478 | 149835896 |
| AGTR1 | rs275697   | SNP_A-8530310 | T | C | 3 | 149798355 | 150043478 | 149836430 |
| AGTR1 | rs6440561  | SNP_A-4280023 | G | A | 3 | 149798355 | 150043478 | 149841272 |
| AGTR1 | rs6440562  | SNP_A-2251525 | C | T | 3 | 149798355 | 150043478 | 149841395 |
| AGTR1 | rs13070340 | SNP_A-8442533 | T | C | 3 | 149798355 | 150043478 | 149841530 |
| AGTR1 | rs6440565  | SNP_A-8603132 | T | C | 3 | 149798355 | 150043478 | 149841622 |
| AGTR1 | rs9862062  | SNP_A-2113145 | G | C | 3 | 149798355 | 150043478 | 149842414 |
| AGTR1 | rs9811115  | SNP_A-1841426 | T | G | 3 | 149798355 | 150043478 | 149842736 |
| AGTR1 | rs1492091  | SNP_A-2035843 | A | C | 3 | 149798355 | 150043478 | 149846833 |
| AGTR1 | rs2933255  | SNP_A-4236305 | A | T | 3 | 149798355 | 150043478 | 149847437 |
| AGTR1 | rs275679   | SNP_A-1974767 | G | C | 3 | 149798355 | 150043478 | 149850993 |
| AGTR1 | rs10513336 | SNP_A-1974768 | A | C | 3 | 149798355 | 150043478 | 149851077 |
| AGTR1 | rs16860657 | SNP_A-8619403 | T | C | 3 | 149798355 | 150043478 | 149851458 |
| AGTR1 | rs275676   | SNP_A-8539550 | T | C | 3 | 149798355 | 150043478 | 149852074 |
| AGTR1 | rs275709   | SNP_A-8692456 | C | T | 3 | 149798355 | 150043478 | 149854725 |
| AGTR1 | rs275710   | SNP_A-8326503 | A | T | 3 | 149798355 | 150043478 | 149855071 |
| AGTR1 | rs275711   | SNP_A-2065921 | G | A | 3 | 149798355 | 150043478 | 149857321 |
| AGTR1 | rs1565588  | SNP_A-8619404 | C | T | 3 | 149798355 | 150043478 | 149859899 |
| AGTR1 | rs10804731 | SNP_A-8514333 | C | T | 3 | 149798355 | 150043478 | 149861560 |
| AGTR1 | rs1492105  | SNP_A-8535474 | G | A | 3 | 149798355 | 150043478 | 149861765 |
| AGTR1 | rs9836959  | SNP_A-1873869 | A | G | 3 | 149798355 | 150043478 | 149862397 |
| AGTR1 | rs718424   | SNP_A-1974770 | C | T | 3 | 149798355 | 150043478 | 149863233 |
| AGTR1 | rs2087737  | SNP_A-2147700 | C | T | 3 | 149798355 | 150043478 | 149864212 |
| AGTR1 | rs16860674 | SNP_A-1881814 | G | A | 3 | 149798355 | 150043478 | 149864692 |
| AGTR1 | rs903051   | SNP_A-8683585 | G | A | 3 | 149798355 | 150043478 | 149865095 |
| AGTR1 | rs17762633 | SNP_A-8687368 | A | C | 3 | 149798355 | 150043478 | 149865762 |
| AGTR1 | rs16860677 | SNP_A-8440733 | G | A | 3 | 149798355 | 150043478 | 149866422 |
| AGTR1 | rs275702   | SNP_A-8357703 | C | T | 3 | 149798355 | 150043478 | 149866676 |
| AGTR1 | rs2934080  | SNP_A-8714273 | C | T | 3 | 149798355 | 150043478 | 149868047 |

|       |            |               |   |   |   |           |           |           |
|-------|------------|---------------|---|---|---|-----------|-----------|-----------|
| AGTR1 | rs2320031  | SNP_A-8466927 | C | A | 3 | 149798355 | 150043478 | 149868971 |
| AGTR1 | rs872212   | SNP_A-2274493 | G | A | 3 | 149798355 | 150043478 | 149869437 |
| AGTR1 | rs2012052  | SNP_A-1832186 | A | T | 3 | 149798355 | 150043478 | 149869546 |
| AGTR1 | rs275674   | SNP_A-4238987 | G | C | 3 | 149798355 | 150043478 | 149879218 |
| AGTR1 | rs454530   | SNP_A-1974772 | G | A | 3 | 149798355 | 150043478 | 149883347 |
| AGTR1 | rs1492090  | SNP_A-8619405 | T | A | 3 | 149798355 | 150043478 | 149884743 |
| AGTR1 | rs2638359  | SNP_A-1825911 | A | T | 3 | 149798355 | 150043478 | 149889073 |
| AGTR1 | rs2638358  | SNP_A-1836701 | T | C | 3 | 149798355 | 150043478 | 149889227 |
| AGTR1 | rs2638357  | SNP_A-4274974 | T | C | 3 | 149798355 | 150043478 | 149889309 |
| AGTR1 | rs2933251  | SNP_A-2233133 | G | T | 3 | 149798355 | 150043478 | 149889489 |
| AGTR1 | rs409742   | SNP_A-2168102 | G | A | 3 | 149798355 | 150043478 | 149895055 |
| AGTR1 | rs4681157  | SNP_A-2026820 | C | A | 3 | 149798355 | 150043478 | 149895098 |
| AGTR1 | rs275651   | SNP_A-2079652 | A | T | 3 | 149798355 | 150043478 | 149897577 |
| AGTR1 | rs275652   | SNP_A-2035602 | T | G | 3 | 149798355 | 150043478 | 149897674 |
| AGTR1 | rs12721267 | SNP_A-1919171 | T | G | 3 | 149798355 | 150043478 | 149899017 |
| AGTR1 | rs2933249  | SNP_A-1884603 | A | G | 3 | 149798355 | 150043478 | 149899210 |
| AGTR1 | rs12721286 | SNP_A-8538929 | G | T | 3 | 149798355 | 150043478 | 149901605 |
| AGTR1 | rs12721221 | SNP_A-8540580 | T | C | 3 | 149798355 | 150043478 | 149902287 |
| AGTR1 | rs2131127  | SNP_A-2154498 | A | G | 3 | 149798355 | 150043478 | 149906833 |
| AGTR1 | rs12695877 | SNP_A-1885548 | C | T | 3 | 149798355 | 150043478 | 149909724 |
| AGTR1 | rs4681440  | SNP_A-2043696 | C | T | 3 | 149798355 | 150043478 | 149914722 |
| AGTR1 | rs12721255 | SNP_A-2280404 | C | T | 3 | 149798355 | 150043478 | 149914903 |
| AGTR1 | rs4681443  | SNP_A-2087349 | A | G | 3 | 149798355 | 150043478 | 149915159 |
| AGTR1 | rs4681444  | SNP_A-2164060 | C | A | 3 | 149798355 | 150043478 | 149915264 |
| AGTR1 | rs1492103  | SNP_A-2149351 | A | G | 3 | 149798355 | 150043478 | 149915654 |
| AGTR1 | rs1492100  | SNP_A-8418874 | T | A | 3 | 149798355 | 150043478 | 149920117 |
| AGTR1 | rs3772616  | SNP_A-8387800 | T | C | 3 | 149798355 | 150043478 | 149920881 |
| AGTR1 | rs4524238  | SNP_A-1939005 | G | A | 3 | 149798355 | 150043478 | 149922478 |
| AGTR1 | rs12695891 | SNP_A-8524289 | A | G | 3 | 149798355 | 150043478 | 149923336 |
| AGTR1 | rs12695894 | SNP_A-4238770 | G | A | 3 | 149798355 | 150043478 | 149925330 |
| AGTR1 | rs12721328 | SNP_A-2294086 | T | G | 3 | 149798355 | 150043478 | 149925644 |
| AGTR1 | rs379600   | SNP_A-8355836 | G | A | 3 | 149798355 | 150043478 | 149927175 |
| AGTR1 | rs16860760 | SNP_A-1974774 | G | A | 3 | 149798355 | 150043478 | 149927327 |
| AGTR1 | rs1826361  | SNP_A-8619406 | C | A | 3 | 149798355 | 150043478 | 149927418 |
| AGTR1 | rs12695902 | SNP_A-1781484 | A | G | 3 | 149798355 | 150043478 | 149931108 |
| AGTR1 | rs12721234 | SNP_A-8410636 | T | C | 3 | 149798355 | 150043478 | 149938624 |
| AGTR1 | rs12695918 | SNP_A-2057247 | T | C | 3 | 149798355 | 150043478 | 149939317 |
| AGTR1 | rs1800766  | SNP_A-8310675 | C | T | 3 | 149798355 | 150043478 | 149940332 |
| AGTR1 | rs12695923 | SNP_A-8692229 | T | C | 3 | 149798355 | 150043478 | 149940600 |
| AGTR1 | rs275646   | SNP_A-2192501 | C | T | 3 | 149798355 | 150043478 | 149946212 |
| AGTR1 | rs275644   | SNP_A-4199672 | T | C | 3 | 149798355 | 150043478 | 149948230 |
| AGTR1 | rs275643   | SNP_A-2104975 | A | G | 3 | 149798355 | 150043478 | 149948294 |
| AGTR1 | rs275642   | SNP_A-2259778 | A | G | 3 | 149798355 | 150043478 | 149948381 |
| AGTR1 | rs430349   | SNP_A-2230335 | C | T | 3 | 149798355 | 150043478 | 149948587 |
| AGTR1 | rs16860812 | SNP_A-2164242 | G | C | 3 | 149798355 | 150043478 | 149948641 |
| AGTR1 | rs172102   | SNP_A-8619407 | A | G | 3 | 149798355 | 150043478 | 149949025 |
| AGTR1 | rs13097326 | SNP_A-2212642 | G | A | 3 | 149798355 | 150043478 | 149951436 |
| AGTR1 | rs10513338 | SNP_A-1974776 | T | C | 3 | 149798355 | 150043478 | 149952280 |
| AGTR1 | rs2675513  | SNP_A-1974777 | T | G | 3 | 149798355 | 150043478 | 149952317 |
| AGTR1 | rs16860840 | SNP_A-2230834 | A | T | 3 | 149798355 | 150043478 | 149953118 |
| AGTR1 | rs17713681 | SNP_A-8529994 | C | T | 3 | 149798355 | 150043478 | 149960403 |
| AGTR1 | rs2934082  | SNP_A-8365887 | T | G | 3 | 149798355 | 150043478 | 149960913 |
| AGTR1 | rs16860864 | SNP_A-8679262 | T | C | 3 | 149798355 | 150043478 | 149963196 |
| AGTR1 | rs6772419  | SNP_A-2238664 | G | A | 3 | 149798355 | 150043478 | 149963938 |
| AGTR1 | rs2934118  | SNP_A-2123142 | T | C | 3 | 149798355 | 150043478 | 149964152 |
| AGTR1 | rs1565586  | SNP_A-1974778 | T | C | 3 | 149798355 | 150043478 | 149965021 |

|       |            |               |   |   |    |           |           |           |
|-------|------------|---------------|---|---|----|-----------|-----------|-----------|
| AGTR1 | rs16860871 | SNP_A-1974779 | C | T | 3  | 149798355 | 150043478 | 149965893 |
| AGTR1 | rs16860881 | SNP_A-8619408 | C | G | 3  | 149798355 | 150043478 | 149967520 |
| AGTR1 | rs7614516  | SNP_A-1846268 | C | T | 3  | 149798355 | 150043478 | 149972797 |
| AGTR1 | rs2934114  | SNP_A-4216744 | C | T | 3  | 149798355 | 150043478 | 149972971 |
| AGTR1 | rs2934086  | SNP_A-8524585 | G | A | 3  | 149798355 | 150043478 | 149973048 |
| AGTR1 | rs2934115  | SNP_A-8619409 | C | T | 3  | 149798355 | 150043478 | 149973786 |
| AGTR1 | rs1027311  | SNP_A-1916936 | G | A | 3  | 149798355 | 150043478 | 149978016 |
| AGTR1 | rs2934127  | SNP_A-8335364 | C | T | 3  | 149798355 | 150043478 | 149987476 |
| AGTR1 | rs9822689  | SNP_A-8317223 | A | G | 3  | 149798355 | 150043478 | 149987561 |
| AGTR1 | rs6801709  | SNP_A-8555990 | T | C | 3  | 149798355 | 150043478 | 149988075 |
| AGTR1 | rs16860909 | SNP_A-2304023 | A | G | 3  | 149798355 | 150043478 | 149988788 |
| AGTR1 | rs11925963 | SNP_A-8383567 | A | G | 3  | 149798355 | 150043478 | 149988801 |
| AGTR1 | rs12634627 | SNP_A-8543444 | C | T | 3  | 149798355 | 150043478 | 149989410 |
| AGTR1 | rs16860930 | SNP_A-8492004 | G | A | 3  | 149798355 | 150043478 | 149992254 |
| AGTR1 | rs13079446 | SNP_A-8381225 | T | A | 3  | 149798355 | 150043478 | 149992304 |
| AGTR1 | rs16860946 | SNP_A-2134895 | C | G | 3  | 149798355 | 150043478 | 149997316 |
| AGTR1 | rs4681449  | SNP_A-8428002 | G | A | 3  | 149798355 | 150043478 | 150004291 |
| AGTR1 | rs2934122  | SNP_A-8438135 | G | C | 3  | 149798355 | 150043478 | 150008061 |
| AGTR1 | rs7611062  | SNP_A-4272721 | A | G | 3  | 149798355 | 150043478 | 150008340 |
| AGTR1 | rs7644988  | SNP_A-4275506 | G | T | 3  | 149798355 | 150043478 | 150008355 |
| AGTR1 | rs6762761  | SNP_A-2242654 | A | C | 3  | 149798355 | 150043478 | 150013536 |
| AGTR1 | rs16860970 | SNP_A-1897663 | G | A | 3  | 149798355 | 150043478 | 150015874 |
| AGTR1 | rs17714660 | SNP_A-4224372 | T | C | 3  | 149798355 | 150043478 | 150016087 |
| AGTR1 | rs6798306  | SNP_A-8656182 | G | T | 3  | 149798355 | 150043478 | 150017044 |
| AGTR1 | rs16860973 | SNP_A-8349533 | A | C | 3  | 149798355 | 150043478 | 150017560 |
| AGTR1 | rs4681158  | SNP_A-8647207 | T | C | 3  | 149798355 | 150043478 | 150021974 |
| AGTR1 | rs10935727 | SNP_A-2052259 | A | G | 3  | 149798355 | 150043478 | 150028390 |
| AGTR1 | rs9821558  | SNP_A-8445120 | A | G | 3  | 149798355 | 150043478 | 150030470 |
| AGTR1 | rs7642396  | SNP_A-2170939 | C | T | 3  | 149798355 | 150043478 | 150032179 |
| AGTR1 | rs4144706  | SNP_A-1819672 | C | T | 3  | 149798355 | 150043478 | 150032525 |
| AGTR1 | rs16861027 | SNP_A-4245331 | T | G | 3  | 149798355 | 150043478 | 150032814 |
| AGTR1 | rs7617340  | SNP_A-8535705 | C | T | 3  | 149798355 | 150043478 | 150033212 |
| AGTR1 | rs11711637 | SNP_A-8686519 | G | A | 3  | 149798355 | 150043478 | 150033517 |
| AGTR1 | rs16861036 | SNP_A-8518592 | T | A | 3  | 149798355 | 150043478 | 150033537 |
| AGTR1 | rs9830213  | SNP_A-2209939 | C | T | 3  | 149798355 | 150043478 | 150035229 |
| AGTR1 | rs1318579  | SNP_A-8619410 | G | T | 3  | 149798355 | 150043478 | 150036250 |
| AGTR1 | rs3772603  | SNP_A-4263823 | G | A | 3  | 149798355 | 150043478 | 150037079 |
| AGTR1 | rs3772602  | SNP_A-8440219 | G | A | 3  | 149798355 | 150043478 | 150037358 |
| AGTR1 | rs3772601  | SNP_A-1974782 | T | C | 3  | 149798355 | 150043478 | 150037449 |
| AGTR1 | rs11919702 | SNP_A-1787866 | G | A | 3  | 149798355 | 150043478 | 150037915 |
| ANG   | rs6576288  | SNP_A-2028393 | T | C | 14 | 20122609  | 20332180  | 20123097  |
| ANG   | rs1756542  | SNP_A-2204728 | G | C | 14 | 20122609  | 20332180  | 20123831  |
| ANG   | rs4981259  | SNP_A-1904568 | T | C | 14 | 20122609  | 20332180  | 20128177  |
| ANG   | rs3827902  | SNP_A-8701289 | G | T | 14 | 20122609  | 20332180  | 20128265  |
| ANG   | rs10151120 | SNP_A-1865769 | C | A | 14 | 20122609  | 20332180  | 20130127  |
| ANG   | rs4981260  | SNP_A-2228865 | G | C | 14 | 20122609  | 20332180  | 20130257  |
| ANG   | rs4981261  | SNP_A-1953477 | G | C | 14 | 20122609  | 20332180  | 20130287  |
| ANG   | rs4981262  | SNP_A-8397424 | T | G | 14 | 20122609  | 20332180  | 20130342  |
| ANG   | rs4981265  | SNP_A-1898230 | C | T | 14 | 20122609  | 20332180  | 20130488  |
| ANG   | rs10131138 | SNP_A-8562911 | G | A | 14 | 20122609  | 20332180  | 20131007  |
| ANG   | rs7159639  | SNP_A-8410750 | G | C | 14 | 20122609  | 20332180  | 20134857  |
| ANG   | rs17242727 | SNP_A-8573201 | A | G | 14 | 20122609  | 20332180  | 20135236  |
| ANG   | rs1272513  | SNP_A-8359898 | A | G | 14 | 20122609  | 20332180  | 20139161  |
| ANG   | rs1243597  | SNP_A-8295677 | A | C | 14 | 20122609  | 20332180  | 20140350  |
| ANG   | rs12323741 | SNP_A-8558159 | A | G | 14 | 20122609  | 20332180  | 20140666  |
| ANG   | rs8018826  | SNP_A-4258341 | T | C | 14 | 20122609  | 20332180  | 20141227  |

|     |            |               |   |   |    |          |          |          |
|-----|------------|---------------|---|---|----|----------|----------|----------|
| ANG | rs8016310  | SNP_A-8313401 | A | G | 14 | 20122609 | 20332180 | 20142544 |
| ANG | rs17242741 | SNP_A-8331188 | G | A | 14 | 20122609 | 20332180 | 20147186 |
| ANG | rs1243655  | SNP_A-8529633 | C | G | 14 | 20122609 | 20332180 | 20147675 |
| ANG | rs1243657  | SNP_A-8512242 | C | T | 14 | 20122609 | 20332180 | 20150888 |
| ANG | rs1243658  | SNP_A-4206211 | A | G | 14 | 20122609 | 20332180 | 20151250 |
| ANG | rs1243659  | SNP_A-2023699 | T | C | 14 | 20122609 | 20332180 | 20151347 |
| ANG | rs1756548  | SNP_A-8635380 | A | C | 14 | 20122609 | 20332180 | 20151498 |
| ANG | ---        | SNP_A-2061432 | A | C | 14 | 20122609 | 20332180 | 20151584 |
| ANG | rs1243661  | SNP_A-8455587 | G | T | 14 | 20122609 | 20332180 | 20153273 |
| ANG | rs1243675  | SNP_A-8533789 | A | G | 14 | 20122609 | 20332180 | 20162443 |
| ANG | rs12432620 | SNP_A-8543581 | A | G | 14 | 20122609 | 20332180 | 20175089 |
| ANG | rs10498270 | SNP_A-8603383 | A | G | 14 | 20122609 | 20332180 | 20176367 |
| ANG | rs8012233  | SNP_A-2302136 | T | C | 14 | 20122609 | 20332180 | 20177904 |
| ANG | rs8007341  | SNP_A-8521415 | C | T | 14 | 20122609 | 20332180 | 20177937 |
| ANG | rs11844727 | SNP_A-1879759 | G | A | 14 | 20122609 | 20332180 | 20178271 |
| ANG | rs17277515 | SNP_A-2030058 | A | G | 14 | 20122609 | 20332180 | 20178749 |
| ANG | rs17114309 | SNP_A-4231085 | G | A | 14 | 20122609 | 20332180 | 20178805 |
| ANG | rs11622794 | SNP_A-2191865 | G | A | 14 | 20122609 | 20332180 | 20179566 |
| ANG | rs11156622 | SNP_A-4256647 | T | C | 14 | 20122609 | 20332180 | 20179699 |
| ANG | rs2115656  | SNP_A-1934081 | C | G | 14 | 20122609 | 20332180 | 20181723 |
| ANG | rs2319378  | SNP_A-4293759 | G | A | 14 | 20122609 | 20332180 | 20182100 |
| ANG | rs7158129  | SNP_A-8631247 | G | A | 14 | 20122609 | 20332180 | 20182515 |
| ANG | rs12147472 | SNP_A-8566770 | G | A | 14 | 20122609 | 20332180 | 20186124 |
| ANG | rs10135437 | SNP_A-8671961 | A | G | 14 | 20122609 | 20332180 | 20193663 |
| ANG | rs12893510 | SNP_A-1915516 | C | T | 14 | 20122609 | 20332180 | 20194287 |
| ANG | rs8003288  | SNP_A-2191884 | C | T | 14 | 20122609 | 20332180 | 20194874 |
| ANG | rs11620733 | SNP_A-8604126 | A | G | 14 | 20122609 | 20332180 | 20195678 |
| ANG | rs4981300  | SNP_A-8690702 | A | G | 14 | 20122609 | 20332180 | 20195878 |
| ANG | rs12431961 | SNP_A-4231087 | A | G | 14 | 20122609 | 20332180 | 20201291 |
| ANG | rs7158152  | SNP_A-4256132 | A | G | 14 | 20122609 | 20332180 | 20203164 |
| ANG | rs10145023 | SNP_A-8312043 | T | C | 14 | 20122609 | 20332180 | 20205289 |
| ANG | rs7143439  | SNP_A-8516373 | T | C | 14 | 20122609 | 20332180 | 20206831 |
| ANG | rs10145502 | SNP_A-8467851 | T | A | 14 | 20122609 | 20332180 | 20213882 |
| ANG | rs10498273 | SNP_A-8604131 | C | G | 14 | 20122609 | 20332180 | 20214639 |
| ANG | rs11629118 | SNP_A-8649405 | T | C | 14 | 20122609 | 20332180 | 20214895 |
| ANG | rs12588573 | SNP_A-8581361 | T | C | 14 | 20122609 | 20332180 | 20216424 |
| ANG | rs12587456 | SNP_A-8715882 | A | G | 14 | 20122609 | 20332180 | 20219948 |
| ANG | rs9322855  | SNP_A-2191902 | A | C | 14 | 20122609 | 20332180 | 20223139 |
| ANG | rs1010461  | SNP_A-4290447 | A | C | 14 | 20122609 | 20332180 | 20223628 |
| ANG | rs5019558  | SNP_A-2309708 | C | G | 14 | 20122609 | 20332180 | 20224089 |
| ANG | rs17114671 | SNP_A-1955851 | C | T | 14 | 20122609 | 20332180 | 20225110 |
| ANG | rs4470055  | SNP_A-8407543 | A | G | 14 | 20122609 | 20332180 | 20226031 |
| ANG | rs8008440  | SNP_A-2245322 | A | G | 14 | 20122609 | 20332180 | 20226288 |
| ANG | rs4982325  | SNP_A-8656787 | T | C | 14 | 20122609 | 20332180 | 20226676 |
| ANG | rs11156631 | SNP_A-1936187 | G | A | 14 | 20122609 | 20332180 | 20229446 |
| ANG | rs8010599  | SNP_A-8431147 | C | T | 14 | 20122609 | 20332180 | 20234674 |
| ANG | rs1999343  | SNP_A-2250534 | G | A | 14 | 20122609 | 20332180 | 20235319 |
| ANG | rs17242790 | SNP_A-2279696 | A | G | 14 | 20122609 | 20332180 | 20236067 |
| ANG | rs17211649 | SNP_A-1953126 | A | G | 14 | 20122609 | 20332180 | 20236123 |
| ANG | rs1320480  | SNP_A-2033470 | T | C | 14 | 20122609 | 20332180 | 20245929 |
| ANG | rs4982343  | SNP_A-1794428 | C | G | 14 | 20122609 | 20332180 | 20248238 |
| ANG | rs8004317  | SNP_A-2249696 | T | C | 14 | 20122609 | 20332180 | 20249121 |
| ANG | rs11628398 | SNP_A-2298521 | A | G | 14 | 20122609 | 20332180 | 20252640 |
| ANG | rs11156638 | SNP_A-2260592 | G | C | 14 | 20122609 | 20332180 | 20258525 |
| ANG | rs4982347  | SNP_A-1871149 | C | T | 14 | 20122609 | 20332180 | 20259512 |
| ANG | rs11156644 | SNP_A-2191935 | A | G | 14 | 20122609 | 20332180 | 20271429 |

|     |            |               |   |   |    |          |          |          |
|-----|------------|---------------|---|---|----|----------|----------|----------|
| ANG | rs8012716  | SNP_A-1950950 | A | G | 14 | 20122609 | 20332180 | 20272176 |
| ANG | rs17277606 | SNP_A-8345195 | T | G | 14 | 20122609 | 20332180 | 20272473 |
| ANG | rs9672003  | SNP_A-8621593 | G | A | 14 | 20122609 | 20332180 | 20272845 |
| ANG | rs9671547  | SNP_A-2274631 | T | C | 14 | 20122609 | 20332180 | 20273172 |
| ANG | rs17308520 | SNP_A-8402570 | A | C | 14 | 20122609 | 20332180 | 20273244 |
| ANG | rs2319444  | SNP_A-2052905 | G | C | 14 | 20122609 | 20332180 | 20273790 |
| ANG | rs8019026  | SNP_A-2092744 | C | T | 14 | 20122609 | 20332180 | 20275863 |
| ANG | rs8013177  | SNP_A-2154766 | G | C | 14 | 20122609 | 20332180 | 20275932 |
| ANG | rs7153831  | SNP_A-2084424 | G | A | 14 | 20122609 | 20332180 | 20276579 |
| ANG | rs9444440  | SNP_A-1853096 | C | T | 14 | 20122609 | 20332180 | 20277396 |
| ANG | rs8019599  | SNP_A-8590612 | G | A | 14 | 20122609 | 20332180 | 20277477 |
| ANG | rs17308534 | SNP_A-8676568 | A | C | 14 | 20122609 | 20332180 | 20277488 |
| ANG | rs8006368  | SNP_A-1809101 | T | C | 14 | 20122609 | 20332180 | 20278496 |
| ANG | rs17308541 | SNP_A-2051706 | G | A | 14 | 20122609 | 20332180 | 20280006 |
| ANG | rs1888567  | SNP_A-2050991 | G | A | 14 | 20122609 | 20332180 | 20283701 |
| ANG | rs11621687 | SNP_A-8482975 | T | G | 14 | 20122609 | 20332180 | 20283810 |
| ANG | rs2873979  | SNP_A-1812098 | G | A | 14 | 20122609 | 20332180 | 20283863 |
| ANG | rs1815437  | SNP_A-2217327 | A | G | 14 | 20122609 | 20332180 | 20283985 |
| ANG | rs1815438  | SNP_A-8600336 | T | C | 14 | 20122609 | 20332180 | 20284120 |
| ANG | rs3790066  | SNP_A-2100458 | C | T | 14 | 20122609 | 20332180 | 20284485 |
| ANG | rs4981328  | SNP_A-8309032 | C | G | 14 | 20122609 | 20332180 | 20284645 |
| ANG | rs8181973  | SNP_A-2276928 | G | A | 14 | 20122609 | 20332180 | 20284910 |
| ANG | rs10136680 | SNP_A-8306260 | T | C | 14 | 20122609 | 20332180 | 20285532 |
| ANG | rs4982352  | SNP_A-1892960 | C | T | 14 | 20122609 | 20332180 | 20288180 |
| ANG | rs2145870  | SNP_A-2098798 | G | A | 14 | 20122609 | 20332180 | 20288504 |
| ANG | rs10141260 | SNP_A-8492761 | G | A | 14 | 20122609 | 20332180 | 20292291 |
| ANG | rs970014   | SNP_A-4204202 | C | T | 14 | 20122609 | 20332180 | 20292766 |
| ANG | rs970015   | SNP_A-2088188 | G | A | 14 | 20122609 | 20332180 | 20292831 |
| ANG | rs1022739  | SNP_A-8482246 | C | A | 14 | 20122609 | 20332180 | 20297013 |
| ANG | rs1022740  | SNP_A-4198081 | A | G | 14 | 20122609 | 20332180 | 20297342 |
| ANG | rs1957333  | SNP_A-1948101 | T | G | 14 | 20122609 | 20332180 | 20297432 |
| ANG | rs8004417  | SNP_A-4253819 | G | C | 14 | 20122609 | 20332180 | 20299040 |
| ANG | rs11848221 | SNP_A-2217146 | A | G | 14 | 20122609 | 20332180 | 20299145 |
| ANG | rs11624594 | SNP_A-2183869 | A | G | 14 | 20122609 | 20332180 | 20300012 |
| ANG | rs12895364 | SNP_A-4259413 | C | T | 14 | 20122609 | 20332180 | 20300040 |
| ANG | rs10139490 | SNP_A-8395852 | T | A | 14 | 20122609 | 20332180 | 20300174 |
| ANG | rs10150727 | SNP_A-2202538 | T | C | 14 | 20122609 | 20332180 | 20300264 |
| ANG | rs12895983 | SNP_A-8310849 | C | T | 14 | 20122609 | 20332180 | 20300416 |
| ANG | rs10131121 | SNP_A-8392460 | G | C | 14 | 20122609 | 20332180 | 20301415 |
| ANG | rs10131142 | SNP_A-8531122 | A | C | 14 | 20122609 | 20332180 | 20301501 |
| ANG | rs762038   | SNP_A-2075234 | G | C | 14 | 20122609 | 20332180 | 20304608 |
| ANG | rs2009021  | SNP_A-4257242 | C | G | 14 | 20122609 | 20332180 | 20304838 |
| ANG | rs2093359  | SNP_A-2101963 | G | A | 14 | 20122609 | 20332180 | 20305259 |
| ANG | rs3748339  | SNP_A-1834589 | G | A | 14 | 20122609 | 20332180 | 20308607 |
| ANG | rs3827907  | SNP_A-1790660 | T | C | 14 | 20122609 | 20332180 | 20308638 |
| ANG | rs17096253 | SNP_A-8531718 | G | C | 14 | 20122609 | 20332180 | 20308944 |
| ANG | rs1951419  | SNP_A-8558469 | T | G | 14 | 20122609 | 20332180 | 20310513 |
| ANG | rs7152592  | SNP_A-8660249 | C | T | 14 | 20122609 | 20332180 | 20314223 |
| ANG | rs12586813 | SNP_A-8602141 | G | A | 14 | 20122609 | 20332180 | 20314319 |
| ANG | rs4312222  | SNP_A-8634322 | G | T | 14 | 20122609 | 20332180 | 20315379 |
| ANG | rs986192   | SNP_A-1848333 | A | G | 14 | 20122609 | 20332180 | 20317060 |
| ANG | rs1045922  | SNP_A-4290459 | G | A | 14 | 20122609 | 20332180 | 20319964 |
| ANG | rs5024915  | SNP_A-2223266 | T | C | 14 | 20122609 | 20332180 | 20325564 |
| ANG | rs4982360  | SNP_A-8717497 | G | A | 14 | 20122609 | 20332180 | 20325966 |
| ANG | rs12881063 | SNP_A-8543611 | C | G | 14 | 20122609 | 20332180 | 20326016 |
| ANG | rs8013362  | SNP_A-2085268 | T | A | 14 | 20122609 | 20332180 | 20326763 |



|      |            |               |   |   |    |          |          |          |
|------|------------|---------------|---|---|----|----------|----------|----------|
| ANG  | rs8009569  | SNP_A-2128484 | T | G | 14 | 20122609 | 20332180 | 20329136 |
| ANG  | rs11847602 | SNP_A-8709330 | G | A | 14 | 20122609 | 20332180 | 20329875 |
| EDN1 | rs10484256 | SNP_A-4211524 | A | G | 6  | 12298599 | 12505399 | 12303136 |
| EDN1 | rs16872422 | SNP_A-2139920 | T | A | 6  | 12298599 | 12505399 | 12303625 |
| EDN1 | rs9471162  | SNP_A-2049652 | T | C | 6  | 12298599 | 12505399 | 12304476 |
| EDN1 | rs9380894  | SNP_A-2280276 | T | C | 6  | 12298599 | 12505399 | 12304590 |
| EDN1 | rs1040992  | SNP_A-8406211 | T | G | 6  | 12298599 | 12505399 | 12304896 |
| EDN1 | rs1040993  | SNP_A-8495124 | C | T | 6  | 12298599 | 12505399 | 12304924 |
| EDN1 | rs1040994  | SNP_A-2070218 | A | C | 6  | 12298599 | 12505399 | 12305199 |
| EDN1 | rs11969649 | SNP_A-4192805 | A | C | 6  | 12298599 | 12505399 | 12306289 |
| EDN1 | rs219974   | SNP_A-1935288 | T | C | 6  | 12298599 | 12505399 | 12306661 |
| EDN1 | rs2012560  | SNP_A-4265508 | C | G | 6  | 12298599 | 12505399 | 12308713 |
| EDN1 | rs1022848  | SNP_A-4265509 | A | G | 6  | 12298599 | 12505399 | 12308758 |
| EDN1 | rs1023483  | SNP_A-2175953 | A | G | 6  | 12298599 | 12505399 | 12308932 |
| EDN1 | rs2187912  | SNP_A-8388494 | C | T | 6  | 12298599 | 12505399 | 12309022 |
| EDN1 | rs9380903  | SNP_A-1903933 | G | A | 6  | 12298599 | 12505399 | 12309766 |
| EDN1 | rs219985   | SNP_A-8667491 | A | T | 6  | 12298599 | 12505399 | 12316651 |
| EDN1 | rs219986   | SNP_A-8667492 | G | T | 6  | 12298599 | 12505399 | 12316805 |
| EDN1 | rs11966018 | SNP_A-8462538 | G | C | 6  | 12298599 | 12505399 | 12317214 |
| EDN1 | rs219987   | SNP_A-8667493 | A | C | 6  | 12298599 | 12505399 | 12317346 |
| EDN1 | rs220012   | SNP_A-8667494 | C | T | 6  | 12298599 | 12505399 | 12322593 |
| EDN1 | rs3021344  | SNP_A-2253196 | A | G | 6  | 12298599 | 12505399 | 12324274 |
| EDN1 | rs12662776 | SNP_A-8445176 | T | G | 6  | 12298599 | 12505399 | 12324462 |
| EDN1 | rs1794854  | SNP_A-8375070 | C | T | 6  | 12298599 | 12505399 | 12324489 |
| EDN1 | rs1794856  | SNP_A-1888919 | G | A | 6  | 12298599 | 12505399 | 12324632 |
| EDN1 | rs10755709 | SNP_A-8417358 | A | G | 6  | 12298599 | 12505399 | 12324952 |
| EDN1 | rs12208557 | SNP_A-8425467 | T | G | 6  | 12298599 | 12505399 | 12325106 |
| EDN1 | rs9380917  | SNP_A-4219730 | G | A | 6  | 12298599 | 12505399 | 12325249 |
| EDN1 | rs7356945  | SNP_A-8630333 | C | T | 6  | 12298599 | 12505399 | 12325408 |
| EDN1 | rs4711607  | SNP_A-2229953 | A | G | 6  | 12298599 | 12505399 | 12325772 |
| EDN1 | rs6908010  | SNP_A-2226979 | T | G | 6  | 12298599 | 12505399 | 12325985 |
| EDN1 | rs10807220 | SNP_A-8544098 | C | A | 6  | 12298599 | 12505399 | 12326358 |
| EDN1 | rs12209755 | SNP_A-8487008 | G | A | 6  | 12298599 | 12505399 | 12330912 |
| EDN1 | rs9367042  | SNP_A-8332294 | A | G | 6  | 12298599 | 12505399 | 12331099 |
| EDN1 | rs2144221  | SNP_A-8424324 | C | T | 6  | 12298599 | 12505399 | 12331506 |
| EDN1 | rs2180030  | SNP_A-2230864 | A | G | 6  | 12298599 | 12505399 | 12331615 |
| EDN1 | rs6922296  | SNP_A-2242578 | A | G | 6  | 12298599 | 12505399 | 12331675 |
| EDN1 | rs17592421 | SNP_A-4276815 | G | A | 6  | 12298599 | 12505399 | 12331908 |
| EDN1 | rs9471238  | SNP_A-8594326 | T | C | 6  | 12298599 | 12505399 | 12332314 |
| EDN1 | rs10947850 | SNP_A-2113655 | C | T | 6  | 12298599 | 12505399 | 12332702 |
| EDN1 | rs1321167  | SNP_A-2299906 | A | G | 6  | 12298599 | 12505399 | 12333013 |
| EDN1 | rs9296319  | SNP_A-1937613 | A | G | 6  | 12298599 | 12505399 | 12334486 |
| EDN1 | rs6458133  | SNP_A-2231973 | C | T | 6  | 12298599 | 12505399 | 12334672 |
| EDN1 | rs9380934  | SNP_A-8402809 | T | C | 6  | 12298599 | 12505399 | 12337924 |
| EDN1 | rs10947858 | SNP_A-8491240 | C | T | 6  | 12298599 | 12505399 | 12341874 |
| EDN1 | rs6919706  | SNP_A-2097862 | C | A | 6  | 12298599 | 12505399 | 12342796 |
| EDN1 | rs9357318  | SNP_A-8673004 | A | G | 6  | 12298599 | 12505399 | 12345980 |
| EDN1 | rs10947862 | SNP_A-1886142 | A | T | 6  | 12298599 | 12505399 | 12350383 |
| EDN1 | rs10456479 | SNP_A-4249686 | T | G | 6  | 12298599 | 12505399 | 12352833 |
| EDN1 | rs10456105 | SNP_A-2039673 | A | G | 6  | 12298599 | 12505399 | 12355596 |
| EDN1 | rs500843   | SNP_A-8498840 | C | T | 6  | 12298599 | 12505399 | 12358908 |
| EDN1 | rs511319   | SNP_A-1830473 | C | G | 6  | 12298599 | 12505399 | 12359174 |
| EDN1 | rs4714340  | SNP_A-8302281 | C | T | 6  | 12298599 | 12505399 | 12363276 |
| EDN1 | rs12201479 | SNP_A-2059623 | C | T | 6  | 12298599 | 12505399 | 12364120 |
| EDN1 | rs9369198  | SNP_A-1818592 | A | C | 6  | 12298599 | 12505399 | 12365414 |
| EDN1 | rs7744944  | SNP_A-8375417 | C | T | 6  | 12298599 | 12505399 | 12366280 |

|      |            |               |   |   |   |          |          |          |
|------|------------|---------------|---|---|---|----------|----------|----------|
| EDN1 | rs6458155  | SNP_A-8429014 | C | T | 6 | 12298599 | 12505399 | 12369907 |
| EDN1 | rs13192093 | SNP_A-8509204 | A | G | 6 | 12298599 | 12505399 | 12371679 |
| EDN1 | rs4145451  | SNP_A-2182445 | A | C | 6 | 12298599 | 12505399 | 12372611 |
| EDN1 | rs1321055  | SNP_A-4265510 | T | A | 6 | 12298599 | 12505399 | 12372985 |
| EDN1 | rs9349158  | SNP_A-8297722 | C | A | 6 | 12298599 | 12505399 | 12382974 |
| EDN1 | rs10807242 | SNP_A-2221298 | G | C | 6 | 12298599 | 12505399 | 12387672 |
| EDN1 | rs9369217  | SNP_A-1906655 | T | C | 6 | 12298599 | 12505399 | 12391748 |
| EDN1 | rs13198076 | SNP_A-8392420 | G | A | 6 | 12298599 | 12505399 | 12394608 |
| EDN1 | rs9380978  | SNP_A-1940317 | G | A | 6 | 12298599 | 12505399 | 12394824 |
| EDN1 | rs1800542  | SNP_A-8704804 | G | A | 6 | 12298599 | 12505399 | 12400514 |
| EDN1 | rs2070699  | SNP_A-2184379 | T | G | 6 | 12298599 | 12505399 | 12400758 |
| EDN1 | rs1476046  | SNP_A-8692445 | A | G | 6 | 12298599 | 12505399 | 12401207 |
| EDN1 | rs9296343  | SNP_A-8406891 | G | C | 6 | 12298599 | 12505399 | 12401519 |
| EDN1 | rs10478723 | SNP_A-1902497 | G | A | 6 | 12298599 | 12505399 | 12403447 |
| EDN1 | rs1626492  | SNP_A-2067429 | G | A | 6 | 12298599 | 12505399 | 12403489 |
| EDN1 | rs6912834  | SNP_A-1796216 | G | A | 6 | 12298599 | 12505399 | 12403521 |
| EDN1 | rs1629862  | SNP_A-8395565 | A | G | 6 | 12298599 | 12505399 | 12403862 |
| EDN1 | rs9296344  | SNP_A-4194062 | T | C | 6 | 12298599 | 12505399 | 12405014 |
| EDN1 | rs4714383  | SNP_A-2200484 | C | T | 6 | 12298599 | 12505399 | 12405468 |
| EDN1 | rs16872592 | SNP_A-1985117 | A | G | 6 | 12298599 | 12505399 | 12409307 |
| EDN1 | rs7356986  | SNP_A-4260964 | G | A | 6 | 12298599 | 12505399 | 12409448 |
| EDN1 | rs11755836 | SNP_A-8312032 | A | C | 6 | 12298599 | 12505399 | 12410555 |
| EDN1 | rs9462653  | SNP_A-8370196 | C | T | 6 | 12298599 | 12505399 | 12412393 |
| EDN1 | rs16872602 | SNP_A-8717236 | A | C | 6 | 12298599 | 12505399 | 12412815 |
| EDN1 | rs6458188  | SNP_A-8597386 | T | A | 6 | 12298599 | 12505399 | 12414123 |
| EDN1 | rs17594577 | SNP_A-8667495 | A | G | 6 | 12298599 | 12505399 | 12414218 |
| EDN1 | rs9471439  | SNP_A-8703080 | A | C | 6 | 12298599 | 12505399 | 12415840 |
| EDN1 | rs16872612 | SNP_A-8295447 | C | G | 6 | 12298599 | 12505399 | 12416068 |
| EDN1 | rs16872628 | SNP_A-2092114 | T | C | 6 | 12298599 | 12505399 | 12421381 |
| EDN1 | rs6458193  | SNP_A-2094708 | A | G | 6 | 12298599 | 12505399 | 12425716 |
| EDN1 | rs17765653 | SNP_A-8616762 | T | C | 6 | 12298599 | 12505399 | 12427513 |
| EDN1 | rs16872657 | SNP_A-2263709 | G | A | 6 | 12298599 | 12505399 | 12433747 |
| EDN1 | rs9381033  | SNP_A-2083042 | A | G | 6 | 12298599 | 12505399 | 12434176 |
| EDN1 | rs9381035  | SNP_A-1892498 | A | G | 6 | 12298599 | 12505399 | 12434705 |
| EDN1 | rs7750360  | SNP_A-8659163 | A | G | 6 | 12298599 | 12505399 | 12437181 |
| EDN1 | rs7760229  | SNP_A-8594546 | G | A | 6 | 12298599 | 12505399 | 12444602 |
| EDN1 | rs12530046 | SNP_A-8636175 | C | T | 6 | 12298599 | 12505399 | 12446145 |
| EDN1 | rs7758251  | SNP_A-8315345 | A | G | 6 | 12298599 | 12505399 | 12447036 |
| EDN1 | rs17765682 | SNP_A-2161958 | C | T | 6 | 12298599 | 12505399 | 12447226 |
| EDN1 | rs9471507  | SNP_A-8648831 | T | C | 6 | 12298599 | 12505399 | 12447766 |
| EDN1 | rs1317584  | SNP_A-2087026 | G | A | 6 | 12298599 | 12505399 | 12450775 |
| EDN1 | rs10947954 | SNP_A-1816008 | T | G | 6 | 12298599 | 12505399 | 12451947 |
| EDN1 | rs10807258 | SNP_A-8484350 | C | T | 6 | 12298599 | 12505399 | 12452248 |
| EDN1 | rs16872704 | SNP_A-8706577 | A | G | 6 | 12298599 | 12505399 | 12453679 |
| EDN1 | rs2327544  | SNP_A-4265511 | A | G | 6 | 12298599 | 12505399 | 12453955 |
| EDN1 | rs2095345  | SNP_A-8626008 | A | G | 6 | 12298599 | 12505399 | 12454856 |
| EDN1 | rs6899475  | SNP_A-8337164 | C | T | 6 | 12298599 | 12505399 | 12457723 |
| EDN1 | rs6903876  | SNP_A-8651986 | G | C | 6 | 12298599 | 12505399 | 12457825 |
| EDN1 | rs2095342  | SNP_A-8427740 | T | C | 6 | 12298599 | 12505399 | 12459987 |
| EDN1 | rs2050288  | SNP_A-2172631 | T | C | 6 | 12298599 | 12505399 | 12462373 |
| EDN1 | rs12332935 | SNP_A-8524768 | T | C | 6 | 12298599 | 12505399 | 12462667 |
| EDN1 | rs17615558 | SNP_A-8631122 | T | G | 6 | 12298599 | 12505399 | 12463160 |
| EDN1 | rs971054   | SNP_A-2311624 | A | G | 6 | 12298599 | 12505399 | 12464453 |
| EDN1 | rs16872713 | SNP_A-8658622 | C | T | 6 | 12298599 | 12505399 | 12466835 |
| EDN1 | rs6925906  | SNP_A-2056912 | A | G | 6 | 12298599 | 12505399 | 12467288 |
| EDN1 | rs6926651  | SNP_A-4304087 | G | A | 6 | 12298599 | 12505399 | 12467703 |

|       |            |               |   |   |   |           |           |           |
|-------|------------|---------------|---|---|---|-----------|-----------|-----------|
| EDN1  | rs6458226  | SNP_A-8321996 | C | T | 6 | 12298599  | 12505399  | 12479841  |
| EDN1  | rs16872733 | SNP_A-1794432 | G | A | 6 | 12298599  | 12505399  | 12480275  |
| EDN1  | rs6458227  | SNP_A-8610750 | C | A | 6 | 12298599  | 12505399  | 12481942  |
| EDN1  | rs9784878  | SNP_A-1924679 | C | G | 6 | 12298599  | 12505399  | 12490217  |
| EDN1  | rs9462731  | SNP_A-1985119 | G | A | 6 | 12298599  | 12505399  | 12491721  |
| EDN1  | rs9471621  | SNP_A-8547831 | T | G | 6 | 12298599  | 12505399  | 12492550  |
| EDN1  | rs10947982 | SNP_A-1840161 | G | A | 6 | 12298599  | 12505399  | 12492958  |
| EDN1  | rs9394825  | SNP_A-8652479 | C | T | 6 | 12298599  | 12505399  | 12497308  |
| EDN1  | rs6922952  | SNP_A-1840912 | T | C | 6 | 12298599  | 12505399  | 12499327  |
| EDN1  | rs994632   | SNP_A-2268980 | A | G | 6 | 12298599  | 12505399  | 12499959  |
| EDN1  | rs7774034  | SNP_A-1877632 | T | G | 6 | 12298599  | 12505399  | 12500116  |
| EDN1  | rs9394827  | SNP_A-2264266 | A | G | 6 | 12298599  | 12505399  | 12500746  |
| EDN1  | rs7771680  | SNP_A-8436000 | C | T | 6 | 12298599  | 12505399  | 12504008  |
| EDN1  | rs16872754 | SNP_A-8421411 | G | A | 6 | 12298599  | 12505399  | 12504124  |
| EDNRA | rs12508797 | SNP_A-8441046 | T | C | 4 | 148521575 | 148785555 | 148522645 |
| EDNRA | rs11939043 | SNP_A-8627493 | G | T | 4 | 148521575 | 148785555 | 148530131 |
| EDNRA | rs1864246  | SNP_A-8476235 | A | C | 4 | 148521575 | 148785555 | 148536952 |
| EDNRA | rs2042998  | SNP_A-2010236 | C | T | 4 | 148521575 | 148785555 | 148540675 |
| EDNRA | rs12647961 | SNP_A-8402875 | T | A | 4 | 148521575 | 148785555 | 148543613 |
| EDNRA | rs2195469  | SNP_A-2217795 | C | T | 4 | 148521575 | 148785555 | 148548006 |
| EDNRA | rs17023196 | SNP_A-8398389 | C | T | 4 | 148521575 | 148785555 | 148548318 |
| EDNRA | rs6537474  | SNP_A-1847909 | T | C | 4 | 148521575 | 148785555 | 148548398 |
| EDNRA | rs17023204 | SNP_A-8645766 | T | C | 4 | 148521575 | 148785555 | 148549096 |
| EDNRA | rs9995888  | SNP_A-8696799 | G | A | 4 | 148521575 | 148785555 | 148552286 |
| EDNRA | rs12511134 | SNP_A-8560625 | T | C | 4 | 148521575 | 148785555 | 148555322 |
| EDNRA | rs1429116  | SNP_A-8385494 | A | G | 4 | 148521575 | 148785555 | 148558612 |
| EDNRA | rs1429117  | SNP_A-4280461 | A | G | 4 | 148521575 | 148785555 | 148560383 |
| EDNRA | rs11947440 | SNP_A-8426113 | C | T | 4 | 148521575 | 148785555 | 148562367 |
| EDNRA | rs1896819  | SNP_A-8663062 | A | C | 4 | 148521575 | 148785555 | 148564195 |
| EDNRA | rs17612591 | SNP_A-8663063 | T | C | 4 | 148521575 | 148785555 | 148565803 |
| EDNRA | rs11722693 | SNP_A-8697365 | G | A | 4 | 148521575 | 148785555 | 148570809 |
| EDNRA | rs10004926 | SNP_A-8418133 | C | T | 4 | 148521575 | 148785555 | 148572732 |
| EDNRA | rs4835398  | SNP_A-8335651 | G | T | 4 | 148521575 | 148785555 | 148572873 |
| EDNRA | rs17023259 | SNP_A-2230081 | T | A | 4 | 148521575 | 148785555 | 148581870 |
| EDNRA | rs3943850  | SNP_A-1824608 | A | G | 4 | 148521575 | 148785555 | 148582094 |
| EDNRA | rs1560231  | SNP_A-8404439 | G | A | 4 | 148521575 | 148785555 | 148582403 |
| EDNRA | rs11944922 | SNP_A-8382280 | A | G | 4 | 148521575 | 148785555 | 148582932 |
| EDNRA | rs4631019  | SNP_A-2191923 | A | G | 4 | 148521575 | 148785555 | 148586417 |
| EDNRA | rs11731134 | SNP_A-1873837 | C | G | 4 | 148521575 | 148785555 | 148599064 |
| EDNRA | rs1400560  | SNP_A-2030339 | G | T | 4 | 148521575 | 148785555 | 148599582 |
| EDNRA | rs6537478  | SNP_A-8335652 | C | T | 4 | 148521575 | 148785555 | 148604544 |
| EDNRA | rs6537479  | SNP_A-4214975 | A | G | 4 | 148521575 | 148785555 | 148604558 |
| EDNRA | rs4469055  | SNP_A-2185372 | G | C | 4 | 148521575 | 148785555 | 148605171 |
| EDNRA | rs12642328 | SNP_A-4287253 | T | C | 4 | 148521575 | 148785555 | 148605757 |
| EDNRA | rs4333164  | SNP_A-8494646 | C | T | 4 | 148521575 | 148785555 | 148616377 |
| EDNRA | rs10305840 | SNP_A-4224482 | C | T | 4 | 148521575 | 148785555 | 148619950 |
| EDNRA | rs6841581  | SNP_A-1914964 | G | A | 4 | 148521575 | 148785555 | 148620640 |
| EDNRA | rs10305845 | SNP_A-4202906 | T | G | 4 | 148521575 | 148785555 | 148620848 |
| EDNRA | rs984457   | SNP_A-2110850 | T | C | 4 | 148521575 | 148785555 | 148622935 |
| EDNRA | rs984458   | SNP_A-2086040 | C | T | 4 | 148521575 | 148785555 | 148622999 |
| EDNRA | rs10305851 | SNP_A-1811849 | G | C | 4 | 148521575 | 148785555 | 148623079 |
| EDNRA | rs11942855 | SNP_A-8413530 | G | A | 4 | 148521575 | 148785555 | 148630628 |
| EDNRA | rs17023363 | SNP_A-8650069 | A | G | 4 | 148521575 | 148785555 | 148631862 |
| EDNRA | rs17023371 | SNP_A-2253276 | T | A | 4 | 148521575 | 148785555 | 148633916 |
| EDNRA | rs17023373 | SNP_A-2058276 | G | T | 4 | 148521575 | 148785555 | 148634068 |
| EDNRA | rs17612742 | SNP_A-2273801 | C | T | 4 | 148521575 | 148785555 | 148634101 |

|       |            |               |   |   |   |           |           |           |
|-------|------------|---------------|---|---|---|-----------|-----------|-----------|
| EDNRA | rs10305875 | SNP_A-1789664 | G | A | 4 | 148521575 | 148785555 | 148636339 |
| EDNRA | rs10024834 | SNP_A-2082107 | G | A | 4 | 148521575 | 148785555 | 148640086 |
| EDNRA | rs6840756  | SNP_A-8690512 | A | C | 4 | 148521575 | 148785555 | 148640804 |
| EDNRA | rs17474816 | SNP_A-2300368 | G | A | 4 | 148521575 | 148785555 | 148641545 |
| EDNRA | rs16998721 | SNP_A-1781665 | A | C | 4 | 148521575 | 148785555 | 148641586 |
| EDNRA | rs6848108  | SNP_A-8641590 | G | A | 4 | 148521575 | 148785555 | 148642075 |
| EDNRA | rs6537485  | SNP_A-2182814 | T | A | 4 | 148521575 | 148785555 | 148647977 |
| EDNRA | rs4591581  | SNP_A-8496053 | G | A | 4 | 148521575 | 148785555 | 148648552 |
| EDNRA | rs9997823  | SNP_A-8593396 | A | G | 4 | 148521575 | 148785555 | 148653052 |
| EDNRA | rs10305885 | SNP_A-8555219 | A | T | 4 | 148521575 | 148785555 | 148653114 |
| EDNRA | rs6537489  | SNP_A-8442619 | T | C | 4 | 148521575 | 148785555 | 148653596 |
| EDNRA | rs9308221  | SNP_A-8690364 | T | C | 4 | 148521575 | 148785555 | 148654292 |
| EDNRA | rs6827096  | SNP_A-1934322 | T | C | 4 | 148521575 | 148785555 | 148654896 |
| EDNRA | rs9999853  | SNP_A-8663064 | C | T | 4 | 148521575 | 148785555 | 148656321 |
| EDNRA | rs6812093  | SNP_A-1979341 | T | A | 4 | 148521575 | 148785555 | 148656605 |
| EDNRA | rs6822565  | SNP_A-4264548 | C | T | 4 | 148521575 | 148785555 | 148656962 |
| EDNRA | rs1517135  | SNP_A-1979343 | C | T | 4 | 148521575 | 148785555 | 148657004 |
| EDNRA | rs11939191 | SNP_A-4264549 | G | A | 4 | 148521575 | 148785555 | 148658165 |
| EDNRA | rs7674137  | SNP_A-8663065 | A | G | 4 | 148521575 | 148785555 | 148659051 |
| EDNRA | rs4835412  | SNP_A-8695335 | G | A | 4 | 148521575 | 148785555 | 148660589 |
| EDNRA | rs10003447 | SNP_A-4248639 | T | C | 4 | 148521575 | 148785555 | 148666829 |
| EDNRA | rs4639051  | SNP_A-1979345 | A | G | 4 | 148521575 | 148785555 | 148668320 |
| EDNRA | rs2048894  | SNP_A-1935557 | A | G | 4 | 148521575 | 148785555 | 148671284 |
| EDNRA | rs10305908 | SNP_A-8660319 | T | C | 4 | 148521575 | 148785555 | 148674569 |
| EDNRA | rs9307838  | SNP_A-8613874 | T | C | 4 | 148521575 | 148785555 | 148674782 |
| EDNRA | rs3756022  | SNP_A-1802358 | C | T | 4 | 148521575 | 148785555 | 148676240 |
| EDNRA | rs10305920 | SNP_A-1894172 | G | A | 4 | 148521575 | 148785555 | 148676955 |
| EDNRA | rs10305921 | SNP_A-1943735 | C | T | 4 | 148521575 | 148785555 | 148677002 |
| EDNRA | rs6841799  | SNP_A-4224362 | G | C | 4 | 148521575 | 148785555 | 148680240 |
| EDNRA | rs5333     | SNP_A-1855680 | T | C | 4 | 148521575 | 148785555 | 148680487 |
| EDNRA | rs5334     | SNP_A-2028694 | A | G | 4 | 148521575 | 148785555 | 148680523 |
| EDNRA | rs10305927 | SNP_A-2060782 | A | C | 4 | 148521575 | 148785555 | 148681141 |
| EDNRA | rs10305928 | SNP_A-2181176 | A | G | 4 | 148521575 | 148785555 | 148682292 |
| EDNRA | rs5341     | SNP_A-1883747 | T | C | 4 | 148521575 | 148785555 | 148684049 |
| EDNRA | rs10028838 | SNP_A-2279445 | T | G | 4 | 148521575 | 148785555 | 148690782 |
| EDNRA | rs11734418 | SNP_A-2231622 | A | T | 4 | 148521575 | 148785555 | 148691903 |
| EDNRA | rs12647366 | SNP_A-2058266 | C | T | 4 | 148521575 | 148785555 | 148696673 |
| EDNRA | rs1517137  | SNP_A-2168154 | T | C | 4 | 148521575 | 148785555 | 148697327 |
| EDNRA | rs1517131  | SNP_A-1979346 | A | G | 4 | 148521575 | 148785555 | 148702718 |
| EDNRA | rs17613180 | SNP_A-8696257 | A | G | 4 | 148521575 | 148785555 | 148705749 |
| EDNRA | rs2090422  | SNP_A-8553057 | C | T | 4 | 148521575 | 148785555 | 148707995 |
| EDNRA | rs1914331  | SNP_A-1832620 | C | A | 4 | 148521575 | 148785555 | 148719626 |
| EDNRA | rs1914329  | SNP_A-8524515 | G | A | 4 | 148521575 | 148785555 | 148719987 |
| EDNRA | rs7675774  | SNP_A-4196399 | A | G | 4 | 148521575 | 148785555 | 148722748 |
| EDNRA | rs11099658 | SNP_A-1906157 | T | G | 4 | 148521575 | 148785555 | 148723823 |
| EDNRA | rs6535545  | SNP_A-8346604 | A | G | 4 | 148521575 | 148785555 | 148733120 |
| EDNRA | rs9998608  | SNP_A-8708197 | C | T | 4 | 148521575 | 148785555 | 148736327 |
| EDNRA | rs11943395 | SNP_A-2143898 | A | G | 4 | 148521575 | 148785555 | 148740688 |
| EDNRA | rs4835438  | SNP_A-2071702 | A | G | 4 | 148521575 | 148785555 | 148741744 |
| EDNRA | rs11933787 | SNP_A-8463483 | T | G | 4 | 148521575 | 148785555 | 148741810 |
| EDNRA | rs17613313 | SNP_A-1961522 | T | C | 4 | 148521575 | 148785555 | 148742883 |
| EDNRA | rs2090424  | SNP_A-2191593 | A | G | 4 | 148521575 | 148785555 | 148744302 |
| EDNRA | rs6824884  | SNP_A-8368525 | A | G | 4 | 148521575 | 148785555 | 148750995 |
| EDNRA | rs10776520 | SNP_A-8640805 | G | T | 4 | 148521575 | 148785555 | 148753332 |
| EDNRA | rs6846220  | SNP_A-8521713 | A | C | 4 | 148521575 | 148785555 | 148754567 |
| EDNRA | rs931779   | SNP_A-2085313 | T | C | 4 | 148521575 | 148785555 | 148755086 |

|       |            |               |   |   |    |           |           |           |
|-------|------------|---------------|---|---|----|-----------|-----------|-----------|
| EDNRA | rs10519911 | SNP_A-4154924 | C | T | 4  | 148521575 | 148785555 | 148770040 |
| EDNRA | rs17023581 | SNP_A-8604211 | G | A | 4  | 148521575 | 148785555 | 148775310 |
| EDNRA | rs2718447  | SNP_A-1979347 | C | T | 4  | 148521575 | 148785555 | 148776142 |
| EDNRB | rs1668633  | SNP_A-2222835 | C | T | 13 | 77267625  | 77491751  | 77269891  |
| EDNRB | rs8000788  | SNP_A-1839290 | C | T | 13 | 77267625  | 77491751  | 77273814  |
| EDNRB | rs8002271  | SNP_A-1787471 | T | C | 13 | 77267625  | 77491751  | 77273922  |
| EDNRB | rs765377   | SNP_A-8450679 | C | T | 13 | 77267625  | 77491751  | 77275835  |
| EDNRB | rs975739   | SNP_A-2161568 | T | G | 13 | 77267625  | 77491751  | 77279147  |
| EDNRB | rs975738   | SNP_A-8564941 | T | A | 13 | 77267625  | 77491751  | 77279180  |
| EDNRB | rs17778592 | SNP_A-8487643 | G | A | 13 | 77267625  | 77491751  | 77282415  |
| EDNRB | rs1766347  | SNP_A-1900775 | G | C | 13 | 77267625  | 77491751  | 77285964  |
| EDNRB | rs10507874 | SNP_A-4286941 | G | T | 13 | 77267625  | 77491751  | 77290759  |
| EDNRB | rs9600936  | SNP_A-8638487 | A | G | 13 | 77267625  | 77491751  | 77294841  |
| EDNRB | rs681020   | SNP_A-4200517 | C | T | 13 | 77267625  | 77491751  | 77301196  |
| EDNRB | rs11619200 | SNP_A-8422942 | A | G | 13 | 77267625  | 77491751  | 77303500  |
| EDNRB | ---        | SNP_A-1897966 | T | C | 13 | 77267625  | 77491751  | 77303519  |
| EDNRB | rs9530697  | SNP_A-8465871 | T | C | 13 | 77267625  | 77491751  | 77303611  |
| EDNRB | rs615608   | SNP_A-1865732 | T | C | 13 | 77267625  | 77491751  | 77303884  |
| EDNRB | rs686365   | SNP_A-8566456 | A | G | 13 | 77267625  | 77491751  | 77306656  |
| EDNRB | rs659016   | SNP_A-1940833 | C | T | 13 | 77267625  | 77491751  | 77306995  |
| EDNRB | rs17068394 | SNP_A-4205365 | G | A | 13 | 77267625  | 77491751  | 77307136  |
| EDNRB | rs1041619  | SNP_A-8390767 | A | T | 13 | 77267625  | 77491751  | 77307151  |
| EDNRB | rs1041620  | SNP_A-8505380 | A | G | 13 | 77267625  | 77491751  | 77307535  |
| EDNRB | rs9318501  | SNP_A-8565698 | A | T | 13 | 77267625  | 77491751  | 77309063  |
| EDNRB | rs667085   | SNP_A-1910433 | G | A | 13 | 77267625  | 77491751  | 77319359  |
| EDNRB | rs7332622  | SNP_A-8582514 | A | C | 13 | 77267625  | 77491751  | 77319464  |
| EDNRB | rs1572091  | SNP_A-4290244 | T | G | 13 | 77267625  | 77491751  | 77326919  |
| EDNRB | rs657507   | SNP_A-2223080 | A | G | 13 | 77267625  | 77491751  | 77327261  |
| EDNRB | rs605393   | SNP_A-2236403 | A | G | 13 | 77267625  | 77491751  | 77328080  |
| EDNRB | rs1924932  | SNP_A-2161645 | C | T | 13 | 77267625  | 77491751  | 77338541  |
| EDNRB | rs4885488  | SNP_A-2161648 | A | G | 13 | 77267625  | 77491751  | 77338577  |
| EDNRB | rs2329042  | SNP_A-8472685 | A | C | 13 | 77267625  | 77491751  | 77340328  |
| EDNRB | rs1924929  | SNP_A-8322052 | G | A | 13 | 77267625  | 77491751  | 77345375  |
| EDNRB | rs17068445 | SNP_A-8515261 | G | A | 13 | 77267625  | 77491751  | 77345704  |
| EDNRB | rs17780066 | SNP_A-8542405 | C | T | 13 | 77267625  | 77491751  | 77346091  |
| EDNRB | rs7982763  | SNP_A-8565721 | A | T | 13 | 77267625  | 77491751  | 77353942  |
| EDNRB | rs9600945  | SNP_A-8636621 | T | A | 13 | 77267625  | 77491751  | 77358690  |
| EDNRB | rs9544627  | SNP_A-2133597 | G | A | 13 | 77267625  | 77491751  | 77359009  |
| EDNRB | rs7998027  | SNP_A-2161667 | A | C | 13 | 77267625  | 77491751  | 77359832  |
| EDNRB | rs4885489  | SNP_A-4227778 | T | C | 13 | 77267625  | 77491751  | 77361850  |
| EDNRB | rs4591023  | SNP_A-2076818 | T | C | 13 | 77267625  | 77491751  | 77362844  |
| EDNRB | rs7994913  | SNP_A-4286220 | C | A | 13 | 77267625  | 77491751  | 77363098  |
| EDNRB | rs12720206 | SNP_A-1836209 | T | C | 13 | 77267625  | 77491751  | 77366161  |
| EDNRB | rs4885491  | SNP_A-2271251 | A | G | 13 | 77267625  | 77491751  | 77368351  |
| EDNRB | rs3027096  | SNP_A-8583284 | C | T | 13 | 77267625  | 77491751  | 77370845  |
| EDNRB | rs12720201 | SNP_A-8704599 | C | T | 13 | 77267625  | 77491751  | 77370929  |
| EDNRB | rs12720199 | SNP_A-2243291 | A | G | 13 | 77267625  | 77491751  | 77371331  |
| EDNRB | rs5351     | SNP_A-8455980 | C | T | 13 | 77267625  | 77491751  | 77373314  |
| EDNRB | rs12720193 | SNP_A-8307609 | T | C | 13 | 77267625  | 77491751  | 77373482  |
| EDNRB | rs12720192 | SNP_A-8689058 | A | G | 13 | 77267625  | 77491751  | 77374330  |
| EDNRB | rs3027108  | SNP_A-1805728 | T | C | 13 | 77267625  | 77491751  | 77375898  |
| EDNRB | rs2147555  | SNP_A-2212536 | C | A | 13 | 77267625  | 77491751  | 77377386  |
| EDNRB | rs3027111  | SNP_A-8681517 | C | T | 13 | 77267625  | 77491751  | 77379869  |
| EDNRB | rs4885493  | SNP_A-2189443 | C | G | 13 | 77267625  | 77491751  | 77381064  |
| EDNRB | rs3027128  | SNP_A-8704428 | G | A | 13 | 77267625  | 77491751  | 77383685  |
| EDNRB | rs3027129  | SNP_A-8661740 | C | T | 13 | 77267625  | 77491751  | 77384402  |

|       |            |               |   |   |    |          |          |          |
|-------|------------|---------------|---|---|----|----------|----------|----------|
| EDNRB | rs1886480  | SNP_A-2219914 | A | G | 13 | 77267625 | 77491751 | 77387085 |
| EDNRB | rs1886481  | SNP_A-4203075 | T | C | 13 | 77267625 | 77491751 | 77387386 |
| EDNRB | rs7333867  | SNP_A-8352819 | T | A | 13 | 77267625 | 77491751 | 77389535 |
| EDNRB | rs9544636  | SNP_A-8365944 | C | T | 13 | 77267625 | 77491751 | 77397570 |
| EDNRB | rs2329049  | SNP_A-2068337 | A | G | 13 | 77267625 | 77491751 | 77402856 |
| EDNRB | rs7998775  | SNP_A-8428197 | C | T | 13 | 77267625 | 77491751 | 77420428 |
| EDNRB | rs7319342  | SNP_A-2213537 | G | A | 13 | 77267625 | 77491751 | 77421485 |
| EDNRB | rs11838546 | SNP_A-8513709 | A | G | 13 | 77267625 | 77491751 | 77429615 |
| EDNRB | rs12720129 | SNP_A-8356508 | C | T | 13 | 77267625 | 77491751 | 77429851 |
| EDNRB | rs4884076  | SNP_A-8682512 | T | C | 13 | 77267625 | 77491751 | 77439953 |
| EDNRB | rs13378491 | SNP_A-8365383 | T | C | 13 | 77267625 | 77491751 | 77440968 |
| EDNRB | rs4885499  | SNP_A-8447667 | G | A | 13 | 77267625 | 77491751 | 77441722 |
| EDNRB | rs4884077  | SNP_A-8640927 | T | C | 13 | 77267625 | 77491751 | 77441896 |
| EDNRB | rs12720100 | SNP_A-2227018 | G | A | 13 | 77267625 | 77491751 | 77448249 |
| EDNRB | rs9544656  | SNP_A-2053365 | G | A | 13 | 77267625 | 77491751 | 77448842 |
| EDNRB | rs7997031  | SNP_A-8533133 | G | A | 13 | 77267625 | 77491751 | 77460488 |
| EDNRB | rs17068628 | SNP_A-4199863 | A | G | 13 | 77267625 | 77491751 | 77460551 |
| EDNRB | rs17068642 | SNP_A-1826349 | G | A | 13 | 77267625 | 77491751 | 77461037 |
| EDNRB | rs17068646 | SNP_A-1896517 | A | T | 13 | 77267625 | 77491751 | 77461465 |
| EDNRB | rs3027091  | SNP_A-8474837 | T | C | 13 | 77267625 | 77491751 | 77463816 |
| EDNRB | rs9530709  | SNP_A-2161767 | T | A | 13 | 77267625 | 77491751 | 77466447 |
| EDNRB | rs10507878 | SNP_A-2161768 | T | C | 13 | 77267625 | 77491751 | 77466739 |
| EDNRB | rs17068678 | SNP_A-4286956 | G | A | 13 | 77267625 | 77491751 | 77466765 |
| EDNRB | rs17068683 | SNP_A-4298626 | G | A | 13 | 77267625 | 77491751 | 77466872 |
| EDNRB | rs4885506  | SNP_A-4252283 | T | C | 13 | 77267625 | 77491751 | 77467402 |
| EDNRB | rs4885507  | SNP_A-1798098 | G | A | 13 | 77267625 | 77491751 | 77468514 |
| EDNRB | rs1330910  | SNP_A-1851030 | T | C | 13 | 77267625 | 77491751 | 77480045 |
| EDNRB | rs1886482  | SNP_A-2161799 | C | T | 13 | 77267625 | 77491751 | 77480389 |
| EDNRB | rs9565375  | SNP_A-1944542 | A | G | 13 | 77267625 | 77491751 | 77487553 |
| HCN2  | rs7258832  | SNP_A-8621528 | G | T | 19 | 440893   | 668157   | 445057   |
| HCN2  | rs4919910  | SNP_A-2109351 | T | C | 19 | 440893   | 668157   | 460717   |
| HCN2  | rs8107361  | SNP_A-1878513 | A | G | 19 | 440893   | 668157   | 489160   |
| HCN2  | rs2288951  | SNP_A-1881148 | A | G | 19 | 440893   | 668157   | 489487   |
| HCN2  | rs2070800  | SNP_A-8369407 | C | T | 19 | 440893   | 668157   | 498973   |
| HCN2  | rs4919850  | SNP_A-2079593 | G | A | 19 | 440893   | 668157   | 507632   |
| HCN2  | rs4919852  | SNP_A-1795586 | T | C | 19 | 440893   | 668157   | 513530   |
| HCN2  | rs10417186 | SNP_A-8645769 | C | A | 19 | 440893   | 668157   | 517738   |
| HCN2  | rs12609053 | SNP_A-1785183 | G | C | 19 | 440893   | 668157   | 526083   |
| HCN2  | rs2283573  | SNP_A-4289846 | T | C | 19 | 440893   | 668157   | 530100   |
| HCN2  | rs3752158  | SNP_A-2100084 | G | C | 19 | 440893   | 668157   | 558984   |
| HCN2  | rs9304924  | SNP_A-8376681 | G | C | 19 | 440893   | 668157   | 581844   |
| HCN2  | rs12610384 | SNP_A-2300094 | G | A | 19 | 440893   | 668157   | 585095   |
| HCN2  | rs6510868  | SNP_A-2297657 | C | T | 19 | 440893   | 668157   | 606608   |
| HCN2  | rs3787004  | SNP_A-8320019 | T | C | 19 | 440893   | 668157   | 608666   |
| HCN2  | rs2301742  | SNP_A-2182099 | T | G | 19 | 440893   | 668157   | 626513   |
| HCN2  | rs12611332 | SNP_A-8439526 | A | G | 19 | 440893   | 668157   | 637181   |
| HCN4  | rs2680346  | SNP_A-8716206 | A | C | 15 | 71300988 | 71548230 | 71314823 |
| HCN4  | rs747873   | SNP_A-8716209 | T | C | 15 | 71300988 | 71548230 | 71315990 |
| HCN4  | rs1871385  | SNP_A-8529296 | C | T | 15 | 71300988 | 71548230 | 71316651 |
| HCN4  | rs2254390  | SNP_A-8716948 | G | A | 15 | 71300988 | 71548230 | 71334769 |
| HCN4  | rs8024434  | SNP_A-8408396 | A | C | 15 | 71300988 | 71548230 | 71334780 |
| HCN4  | rs3784794  | SNP_A-1785180 | C | G | 15 | 71300988 | 71548230 | 71334882 |
| HCN4  | rs2251205  | SNP_A-8698194 | A | G | 15 | 71300988 | 71548230 | 71338303 |
| HCN4  | rs10518997 | SNP_A-2295986 | G | A | 15 | 71300988 | 71548230 | 71343997 |
| HCN4  | rs2660826  | SNP_A-4232715 | G | A | 15 | 71300988 | 71548230 | 71344687 |
| HCN4  | rs16957732 | SNP_A-8608161 | A | G | 15 | 71300988 | 71548230 | 71350030 |

|      |            |               |   |   |    |          |          |          |
|------|------------|---------------|---|---|----|----------|----------|----------|
| HCN4 | rs8027588  | SNP_A-2270937 | T | C | 15 | 71300988 | 71548230 | 71352703 |
| HCN4 | rs10438294 | SNP_A-1949260 | C | T | 15 | 71300988 | 71548230 | 71363706 |
| HCN4 | rs499098   | SNP_A-2278676 | C | T | 15 | 71300988 | 71548230 | 71371837 |
| HCN4 | ---        | SNP_A-2029130 | T | A | 15 | 71300988 | 71548230 | 71373224 |
| HCN4 | rs2252725  | SNP_A-4260737 | C | T | 15 | 71300988 | 71548230 | 71373320 |
| HCN4 | rs2292915  | SNP_A-8714195 | T | C | 15 | 71300988 | 71548230 | 71377632 |
| HCN4 | rs533460   | SNP_A-2172069 | G | A | 15 | 71300988 | 71548230 | 71378143 |
| HCN4 | rs12442755 | SNP_A-8713888 | T | G | 15 | 71300988 | 71548230 | 71378276 |
| HCN4 | rs8040516  | SNP_A-2243045 | T | C | 15 | 71300988 | 71548230 | 71385601 |
| HCN4 | rs531019   | SNP_A-2254886 | A | G | 15 | 71300988 | 71548230 | 71385660 |
| HCN4 | rs494493   | SNP_A-2116304 | T | C | 15 | 71300988 | 71548230 | 71407050 |
| HCN4 | rs498005   | SNP_A-2294121 | C | T | 15 | 71300988 | 71548230 | 71407363 |
| HCN4 | rs488156   | SNP_A-1843421 | A | G | 15 | 71300988 | 71548230 | 71412948 |
| HCN4 | rs3859015  | SNP_A-8696926 | A | G | 15 | 71300988 | 71548230 | 71414023 |
| HCN4 | rs488784   | SNP_A-8716323 | T | C | 15 | 71300988 | 71548230 | 71422414 |
| HCN4 | rs568760   | SNP_A-8305343 | C | T | 15 | 71300988 | 71548230 | 71431449 |
| HCN4 | rs489913   | SNP_A-8375354 | C | T | 15 | 71300988 | 71548230 | 71432872 |
| HCN4 | rs8024056  | SNP_A-1837843 | G | T | 15 | 71300988 | 71548230 | 71443821 |
| HCN4 | rs8038766  | SNP_A-2111935 | A | G | 15 | 71300988 | 71548230 | 71450367 |
| HCN4 | rs3940418  | SNP_A-4260529 | C | G | 15 | 71300988 | 71548230 | 71458570 |
| HCN4 | rs6495063  | SNP_A-8478150 | G | T | 15 | 71300988 | 71548230 | 71469761 |
| HCN4 | rs6495064  | SNP_A-8530756 | C | T | 15 | 71300988 | 71548230 | 71469920 |
| HCN4 | rs13329478 | SNP_A-8324229 | G | A | 15 | 71300988 | 71548230 | 71484160 |
| HCN4 | rs1863403  | SNP_A-8509958 | T | G | 15 | 71300988 | 71548230 | 71489605 |
| HCN4 | rs13379778 | SNP_A-2056540 | C | T | 15 | 71300988 | 71548230 | 71490673 |
| HCN4 | rs11072418 | SNP_A-8486876 | C | T | 15 | 71300988 | 71548230 | 71491217 |
| HCN4 | rs16957885 | SNP_A-2296082 | A | G | 15 | 71300988 | 71548230 | 71504998 |
| HCN4 | rs10468058 | SNP_A-8397194 | C | T | 15 | 71300988 | 71548230 | 71505973 |
| HCN4 | rs11072419 | SNP_A-2175173 | G | A | 15 | 71300988 | 71548230 | 71507542 |
| HCN4 | rs11072420 | SNP_A-8495612 | C | T | 15 | 71300988 | 71548230 | 71507759 |
| HCN4 | rs10519002 | SNP_A-8706048 | A | C | 15 | 71300988 | 71548230 | 71509758 |
| HCN4 | rs2415151  | SNP_A-2185857 | A | C | 15 | 71300988 | 71548230 | 71510318 |
| HCN4 | rs8032265  | SNP_A-8530399 | G | A | 15 | 71300988 | 71548230 | 71519626 |
| HCN4 | rs16957901 | SNP_A-8427975 | T | C | 15 | 71300988 | 71548230 | 71520844 |
| HCN4 | rs1582742  | SNP_A-4214371 | C | T | 15 | 71300988 | 71548230 | 71525138 |
| HCN4 | rs3889591  | SNP_A-8560555 | G | A | 15 | 71300988 | 71548230 | 71537925 |
| HCN4 | rs16957918 | SNP_A-8585040 | A | C | 15 | 71300988 | 71548230 | 71538518 |
| HCN4 | rs11638992 | SNP_A-2178319 | T | C | 15 | 71300988 | 71548230 | 71543937 |
| HCN4 | rs8043384  | SNP_A-8645001 | A | G | 15 | 71300988 | 71548230 | 71544268 |
| INS  | rs10732518 | SNP_A-1811408 | C | T | 11 | 2006927  | 2239027  | 2010508  |
| INS  | rs12287619 | SNP_A-8411690 | G | A | 11 | 2006927  | 2239027  | 2011077  |
| INS  | rs11042391 | SNP_A-8377768 | G | A | 11 | 2006927  | 2239027  | 2020174  |
| INS  | rs4930030  | SNP_A-2100090 | T | C | 11 | 2006927  | 2239027  | 2043796  |
| INS  | rs10840297 | SNP_A-8503014 | T | G | 11 | 2006927  | 2239027  | 2044303  |
| INS  | rs4930031  | SNP_A-4220347 | T | C | 11 | 2006927  | 2239027  | 2044487  |
| INS  | rs10840303 | SNP_A-8313824 | G | C | 11 | 2006927  | 2239027  | 2049559  |
| INS  | rs6578975  | SNP_A-4251724 | G | A | 11 | 2006927  | 2239027  | 2052375  |
| INS  | rs11600952 | SNP_A-8587391 | G | A | 11 | 2006927  | 2239027  | 2057859  |
| INS  | rs9971488  | SNP_A-1812010 | A | T | 11 | 2006927  | 2239027  | 2057893  |
| INS  | rs7949013  | SNP_A-8614940 | T | C | 11 | 2006927  | 2239027  | 2058268  |
| INS  | rs6578977  | SNP_A-8704084 | G | A | 11 | 2006927  | 2239027  | 2058380  |
| INS  | rs12289890 | SNP_A-8692919 | T | G | 11 | 2006927  | 2239027  | 2061791  |
| INS  | rs12575785 | SNP_A-8424174 | C | T | 11 | 2006927  | 2239027  | 2065370  |
| INS  | rs7932949  | SNP_A-8295584 | G | A | 11 | 2006927  | 2239027  | 2068107  |
| INS  | rs7947758  | SNP_A-1784086 | G | T | 11 | 2006927  | 2239027  | 2075695  |
| INS  | rs4929957  | SNP_A-8624565 | G | A | 11 | 2006927  | 2239027  | 2084885  |

|      |            |               |   |   |    |          |          |          |
|------|------------|---------------|---|---|----|----------|----------|----------|
| INS  | rs6578985  | SNP_A-4232586 | A | G | 11 | 2006927  | 2239027  | 2094715  |
| INS  | rs6578986  | SNP_A-8452384 | A | G | 11 | 2006927  | 2239027  | 2094728  |
| INS  | rs6578987  | SNP_A-8322400 | T | C | 11 | 2006927  | 2239027  | 2098162  |
| INS  | rs734351   | SNP_A-2222924 | A | G | 11 | 2006927  | 2239027  | 2112789  |
| INS  | rs3213225  | SNP_A-8693341 | G | A | 11 | 2006927  | 2239027  | 2113112  |
| INS  | rs3213221  | SNP_A-4253966 | G | C | 11 | 2006927  | 2239027  | 2113620  |
| INS  | rs3213219  | SNP_A-8307885 | C | T | 11 | 2006927  | 2239027  | 2113726  |
| INS  | rs3213218  | SNP_A-1870619 | T | A | 11 | 2006927  | 2239027  | 2114097  |
| INS  | rs3741208  | SNP_A-2313355 | G | A | 11 | 2006927  | 2239027  | 2126350  |
| INS  | rs10840442 | SNP_A-8632218 | T | C | 11 | 2006927  | 2239027  | 2128498  |
| INS  | rs7924316  | SNP_A-8601849 | G | T | 11 | 2006927  | 2239027  | 2130023  |
| INS  | rs3842770  | SNP_A-8324314 | A | G | 11 | 2006927  | 2239027  | 2135246  |
| INS  | rs11564708 | SNP_A-8598009 | G | C | 11 | 2006927  | 2239027  | 2162902  |
| INS  | rs11043069 | SNP_A-8684857 | T | C | 11 | 2006927  | 2239027  | 2177228  |
| INS  | rs3934904  | SNP_A-4302409 | T | C | 11 | 2006927  | 2239027  | 2177516  |
| INS  | rs12270978 | SNP_A-8404707 | C | G | 11 | 2006927  | 2239027  | 2179391  |
| INS  | rs12292212 | SNP_A-8593347 | G | A | 11 | 2006927  | 2239027  | 2179489  |
| INS  | rs7478680  | SNP_A-1861510 | C | T | 11 | 2006927  | 2239027  | 2179936  |
| INS  | rs11043147 | SNP_A-8357242 | G | C | 11 | 2006927  | 2239027  | 2190745  |
| INS  | rs11606404 | SNP_A-2194124 | G | A | 11 | 2006927  | 2239027  | 2197791  |
| INS  | rs11021732 | SNP_A-2151950 | T | C | 11 | 2006927  | 2239027  | 2197848  |
| INS  | rs10765826 | SNP_A-2073153 | A | G | 11 | 2006927  | 2239027  | 2197897  |
| INS  | rs6578246  | SNP_A-2101944 | A | G | 11 | 2006927  | 2239027  | 2201921  |
| INS  | rs12099223 | SNP_A-8606697 | G | A | 11 | 2006927  | 2239027  | 2212139  |
| INS  | rs11564688 | SNP_A-8621810 | T | G | 11 | 2006927  | 2239027  | 2212857  |
| INS  | rs7941969  | SNP_A-8554844 | C | T | 11 | 2006927  | 2239027  | 2217119  |
| INS  | rs10831633 | SNP_A-8545344 | A | G | 11 | 2006927  | 2239027  | 2224512  |
| INS  | rs11021918 | SNP_A-2170907 | T | A | 11 | 2006927  | 2239027  | 2225766  |
| INS  | rs6578252  | SNP_A-4242618 | G | T | 11 | 2006927  | 2239027  | 2226817  |
| NPPA | rs6660106  | SNP_A-8354850 | T | G | 1  | 11728356 | 11930989 | 11729438 |
| NPPA | rs6677313  | SNP_A-8434763 | C | G | 1  | 11728356 | 11930989 | 11732432 |
| NPPA | rs11121821 | SNP_A-2148321 | A | G | 1  | 11728356 | 11930989 | 11733431 |
| NPPA | rs1133398  | SNP_A-2147876 | A | G | 1  | 11728356 | 11930989 | 11737218 |
| NPPA | rs6661241  | SNP_A-8699971 | T | A | 1  | 11728356 | 11930989 | 11737951 |
| NPPA | rs6700513  | SNP_A-8409392 | G | C | 1  | 11728356 | 11930989 | 11738679 |
| NPPA | rs4845881  | SNP_A-8373857 | A | G | 1  | 11728356 | 11930989 | 11750906 |
| NPPA | rs6667720  | SNP_A-1781313 | T | C | 1  | 11728356 | 11930989 | 11754202 |
| NPPA | rs11121828 | SNP_A-4260556 | G | A | 1  | 11728356 | 11930989 | 11757041 |
| NPPA | rs4846042  | SNP_A-1904281 | C | A | 1  | 11728356 | 11930989 | 11759886 |
| NPPA | rs4845882  | SNP_A-1852165 | A | G | 1  | 11728356 | 11930989 | 11765754 |
| NPPA | rs4846048  | SNP_A-8331309 | A | G | 1  | 11728356 | 11930989 | 11768839 |
| NPPA | rs4845884  | SNP_A-4222556 | G | A | 1  | 11728356 | 11930989 | 11769034 |
| NPPA | rs7535669  | SNP_A-4283999 | C | G | 1  | 11728356 | 11930989 | 11776186 |
| NPPA | rs4846051  | SNP_A-8625679 | A | G | 1  | 11728356 | 11930989 | 11777044 |
| NPPA | rs1801131  | SNP_A-8699092 | T | G | 1  | 11728356 | 11930989 | 11777063 |
| NPPA | rs12121543 | SNP_A-8302865 | C | A | 1  | 11728356 | 11930989 | 11777258 |
| NPPA | rs9651118  | SNP_A-1827473 | T | C | 1  | 11728356 | 11930989 | 11784801 |
| NPPA | rs17367504 | SNP_A-2274478 | A | G | 1  | 11728356 | 11930989 | 11785365 |
| NPPA | rs17037429 | SNP_A-8469046 | C | T | 1  | 11728356 | 11930989 | 11796374 |
| NPPA | rs12404124 | SNP_A-4286085 | T | G | 1  | 11728356 | 11930989 | 11796456 |
| NPPA | rs11121833 | SNP_A-8511837 | C | T | 1  | 11728356 | 11930989 | 11798630 |
| NPPA | rs198391   | SNP_A-4249172 | C | T | 1  | 11728356 | 11930989 | 11799004 |
| NPPA | rs2076001  | SNP_A-2121430 | A | G | 1  | 11728356 | 11930989 | 11801854 |
| NPPA | rs12567136 | SNP_A-1782458 | T | C | 1  | 11728356 | 11930989 | 11806318 |
| NPPA | rs2076003  | SNP_A-4202691 | T | C | 1  | 11728356 | 11930989 | 11806734 |
| NPPA | rs7537765  | SNP_A-1999881 | G | A | 1  | 11728356 | 11930989 | 11809890 |



|      |            |               |   |   |    |          |          |          |
|------|------------|---------------|---|---|----|----------|----------|----------|
| NPPA | rs198401   | SNP_A-8302978 | A | G | 1  | 11728356 | 11930989 | 11810971 |
| NPPA | rs535107   | SNP_A-4218646 | G | A | 1  | 11728356 | 11930989 | 11812055 |
| NPPA | rs2236797  | SNP_A-2210541 | T | C | 1  | 11728356 | 11930989 | 11815237 |
| NPPA | rs2075538  | SNP_A-4201134 | C | T | 1  | 11728356 | 11930989 | 11819189 |
| NPPA | rs198403   | SNP_A-2212770 | A | G | 1  | 11728356 | 11930989 | 11819241 |
| NPPA | rs198404   | SNP_A-4195470 | A | T | 1  | 11728356 | 11930989 | 11819414 |
| NPPA | rs2075539  | SNP_A-1843925 | A | G | 1  | 11728356 | 11930989 | 11820345 |
| NPPA | rs1023252  | SNP_A-4251993 | G | T | 1  | 11728356 | 11930989 | 11821620 |
| NPPA | rs198413   | SNP_A-4294108 | T | C | 1  | 11728356 | 11930989 | 11823389 |
| NPPA | rs198414   | SNP_A-8325275 | T | G | 1  | 11728356 | 11930989 | 11823412 |
| NPPA | rs5065     | SNP_A-4245831 | G | A | 1  | 11728356 | 11930989 | 11828655 |
| NPPA | rs5063     | SNP_A-2116869 | C | T | 1  | 11728356 | 11930989 | 11830235 |
| NPPA | rs17376426 | SNP_A-2288453 | C | T | 1  | 11728356 | 11930989 | 11830754 |
| NPPA | rs198372   | SNP_A-8409051 | G | A | 1  | 11728356 | 11930989 | 11832101 |
| NPPA | rs6694164  | SNP_A-2213757 | T | C | 1  | 11728356 | 11930989 | 11832926 |
| NPPA | rs198381   | SNP_A-8452767 | A | G | 1  | 11728356 | 11930989 | 11838336 |
| NPPA | rs12562819 | SNP_A-1880203 | A | G | 1  | 11728356 | 11930989 | 11846614 |
| NPPA | rs12562952 | SNP_A-8712968 | T | C | 1  | 11728356 | 11930989 | 11849643 |
| NPPA | rs1009592  | SNP_A-8559208 | C | G | 1  | 11728356 | 11930989 | 11851301 |
| NPPA | rs1009591  | SNP_A-8477217 | T | C | 1  | 11728356 | 11930989 | 11851417 |
| NPPA | rs11803049 | SNP_A-8630274 | A | G | 1  | 11728356 | 11930989 | 11851482 |
| NPPA | rs4846064  | SNP_A-2116773 | C | T | 1  | 11728356 | 11930989 | 11857429 |
| NPPA | rs2008113  | SNP_A-8300332 | G | A | 1  | 11728356 | 11930989 | 11861453 |
| NPPA | rs12741980 | SNP_A-8656415 | C | A | 1  | 11728356 | 11930989 | 11862180 |
| NPPA | rs11588551 | SNP_A-4301119 | T | C | 1  | 11728356 | 11930989 | 11864523 |
| NPPA | rs6667637  | SNP_A-1898145 | A | G | 1  | 11728356 | 11930989 | 11870544 |
| NPPA | rs2336377  | SNP_A-2123595 | A | G | 1  | 11728356 | 11930989 | 11872557 |
| NPPA | rs1321073  | SNP_A-2217826 | G | A | 1  | 11728356 | 11930989 | 11874213 |
| NPPA | rs34175640 | SNP_A-1795741 | C | T | 1  | 11728356 | 11930989 | 11874799 |
| NPPA | rs17346334 | SNP_A-4258689 | C | T | 1  | 11728356 | 11930989 | 11882981 |
| NPPA | rs11800086 | SNP_A-1804370 | A | G | 1  | 11728356 | 11930989 | 11894336 |
| NPPA | rs744754   | SNP_A-8402971 | C | T | 1  | 11728356 | 11930989 | 11930790 |
| PTH  | rs7116636  | SNP_A-1916205 | T | A | 11 | 13370178 | 13574143 | 13386397 |
| PTH  | rs7103068  | SNP_A-2218220 | C | G | 11 | 13370178 | 13574143 | 13386537 |
| PTH  | rs7122965  | SNP_A-8597146 | C | T | 11 | 13370178 | 13574143 | 13386566 |
| PTH  | rs7925736  | SNP_A-2139925 | A | G | 11 | 13370178 | 13574143 | 13393557 |
| PTH  | rs11022813 | SNP_A-2156614 | T | A | 11 | 13370178 | 13574143 | 13399354 |
| PTH  | rs3789325  | SNP_A-2193241 | T | C | 11 | 13370178 | 13574143 | 13399826 |
| PTH  | rs730415   | SNP_A-8530617 | C | T | 11 | 13370178 | 13574143 | 13415321 |
| PTH  | rs10832036 | SNP_A-1882183 | C | A | 11 | 13370178 | 13574143 | 13419429 |
| PTH  | rs7107468  | SNP_A-4207234 | A | C | 11 | 13370178 | 13574143 | 13421460 |
| PTH  | rs307207   | SNP_A-8333862 | A | G | 11 | 13370178 | 13574143 | 13432301 |
| PTH  | rs2593579  | SNP_A-1837324 | A | C | 11 | 13370178 | 13574143 | 13435415 |
| PTH  | rs307246   | SNP_A-1831582 | A | G | 11 | 13370178 | 13574143 | 13439803 |
| PTH  | rs307237   | SNP_A-8333863 | C | T | 11 | 13370178 | 13574143 | 13450629 |
| PTH  | rs307238   | SNP_A-4269210 | A | G | 11 | 13370178 | 13574143 | 13451340 |
| PTH  | rs12418886 | SNP_A-2218929 | T | C | 11 | 13370178 | 13574143 | 13457354 |
| PTH  | rs307253   | SNP_A-8333864 | G | A | 11 | 13370178 | 13574143 | 13466193 |
| PTH  | rs6254     | SNP_A-8333865 | T | C | 11 | 13370178 | 13574143 | 13470839 |
| PTH  | rs16912882 | SNP_A-8561899 | T | C | 11 | 13370178 | 13574143 | 13477575 |
| PTH  | rs12292991 | SNP_A-8449569 | G | A | 11 | 13370178 | 13574143 | 13478596 |
| PTH  | rs10766086 | SNP_A-1804810 | C | T | 11 | 13370178 | 13574143 | 13480027 |
| PTH  | rs11600801 | SNP_A-2135172 | T | C | 11 | 13370178 | 13574143 | 13482815 |
| PTH  | rs11022858 | SNP_A-2279314 | C | T | 11 | 13370178 | 13574143 | 13483209 |
| PTH  | rs307223   | SNP_A-2037913 | T | A | 11 | 13370178 | 13574143 | 13490926 |
| PTH  | rs11022863 | SNP_A-8644065 | T | C | 11 | 13370178 | 13574143 | 13495920 |

|     |            |                   |   |   |    |           |           |           |
|-----|------------|-------------------|---|---|----|-----------|-----------|-----------|
| PTH | rs7930198  | SNP_A-8571122     | T | C | 11 | 13370178  | 13574143  | 13503073  |
| PTH | rs11605533 | SNP_A-1797443     | G | A | 11 | 13370178  | 13574143  | 13503597  |
| PTH | rs7931255  | SNP_A-2188281     | A | C | 11 | 13370178  | 13574143  | 13504193  |
| PTH | rs16912909 | SNP_A-2184607     | T | C | 11 | 13370178  | 13574143  | 13504574  |
| PTH | rs12365099 | SNP_A-2090272     | A | G | 11 | 13370178  | 13574143  | 13504676  |
| PTH | rs7101533  | SNP_A-8543542     | T | C | 11 | 13370178  | 13574143  | 13506766  |
| PTH | rs10832054 | SNP_A-4222167     | G | T | 11 | 13370178  | 13574143  | 13506796  |
| PTH | rs11022876 | SNP_A-2086891     | T | C | 11 | 13370178  | 13574143  | 13529284  |
| PTH | rs1459011  | SNP_A-2007910     | C | T | 11 | 13370178  | 13574143  | 13530130  |
| PTH | rs10500783 | SNP_A-4269212     | C | T | 11 | 13370178  | 13574143  | 13530190  |
| PTH | rs10500784 | SNP_A-4269213     | C | A | 11 | 13370178  | 13574143  | 13530401  |
| PTH | rs10500785 | SNP_A-2007911     | T | G | 11 | 13370178  | 13574143  | 13530459  |
| PTH | rs6486132  | SNP_A-1914184     | G | A | 11 | 13370178  | 13574143  | 13540048  |
| PTH | rs10500786 | SNP_A-2007913     | G | A | 11 | 13370178  | 13574143  | 13540360  |
| PTH | rs2018354  | SNP_A-2007914     | G | T | 11 | 13370178  | 13574143  | 13540442  |
| PTH | rs11022887 | SNP_A-1855584     | T | A | 11 | 13370178  | 13574143  | 13541352  |
| PTH | rs11022887 | AFFX-SNP_11173969 | T | A | 11 | 13370178  | 13574143  | 13541352  |
| PTH | rs1979877  | SNP_A-4269214     | A | G | 11 | 13370178  | 13574143  | 13542274  |
| PTH | rs1870411  | SNP_A-2073019     | G | A | 11 | 13370178  | 13574143  | 13545519  |
| PTH | rs11022889 | SNP_A-2082100     | A | G | 11 | 13370178  | 13574143  | 13545586  |
| PTH | rs1870413  | SNP_A-1840039     | T | G | 11 | 13370178  | 13574143  | 13545731  |
| PTH | rs898148   | SNP_A-1823396     | C | G | 11 | 13370178  | 13574143  | 13554992  |
| PTH | rs10734216 | SNP_A-8513040     | A | G | 11 | 13370178  | 13574143  | 13564965  |
| PTH | rs10766101 | SNP_A-8558350     | A | G | 11 | 13370178  | 13574143  | 13573557  |
| REN | rs2366007  | SNP_A-8665989     | C | G | 1  | 202290571 | 202502088 | 202296226 |
| REN | rs17404274 | SNP_A-1980731     | T | C | 1  | 202290571 | 202502088 | 202299198 |
| REN | rs7524385  | SNP_A-2195213     | A | G | 1  | 202290571 | 202502088 | 202302170 |
| REN | rs6696187  | SNP_A-8711879     | C | T | 1  | 202290571 | 202502088 | 202307026 |
| REN | rs4951300  | SNP_A-8608138     | A | G | 1  | 202290571 | 202502088 | 202311189 |
| REN | rs17404301 | SNP_A-2077588     | A | G | 1  | 202290571 | 202502088 | 202314143 |
| REN | rs11240658 | SNP_A-8529153     | C | T | 1  | 202290571 | 202502088 | 202314510 |
| REN | rs885330   | SNP_A-8585491     | G | A | 1  | 202290571 | 202502088 | 202315716 |
| REN | rs885332   | SNP_A-1872112     | T | G | 1  | 202290571 | 202502088 | 202315811 |
| REN | rs12117788 | SNP_A-8684536     | A | G | 1  | 202290571 | 202502088 | 202315823 |
| REN | rs12069284 | SNP_A-8691374     | A | G | 1  | 202290571 | 202502088 | 202323744 |
| REN | rs17404350 | SNP_A-2114409     | G | C | 1  | 202290571 | 202502088 | 202323765 |
| REN | rs7528560  | SNP_A-8649552     | G | A | 1  | 202290571 | 202502088 | 202328367 |
| REN | rs11240663 | SNP_A-1980737     | G | A | 1  | 202290571 | 202502088 | 202328809 |
| REN | rs12034028 | SNP_A-8665991     | C | T | 1  | 202290571 | 202502088 | 202329031 |
| REN | rs16852826 | SNP_A-8703227     | G | A | 1  | 202290571 | 202502088 | 202334733 |
| REN | rs3795579  | SNP_A-1936277     | T | G | 1  | 202290571 | 202502088 | 202336461 |
| REN | rs1534097  | SNP_A-2186848     | T | C | 1  | 202290571 | 202502088 | 202336581 |
| REN | rs11240666 | SNP_A-8593194     | G | A | 1  | 202290571 | 202502088 | 202336847 |
| REN | rs6700051  | SNP_A-4264765     | G | C | 1  | 202290571 | 202502088 | 202338513 |
| REN | rs16852855 | SNP_A-1902774     | G | C | 1  | 202290571 | 202502088 | 202340845 |
| REN | rs12563446 | SNP_A-8354218     | G | A | 1  | 202290571 | 202502088 | 202341155 |
| REN | rs4951043  | SNP_A-2277203     | T | C | 1  | 202290571 | 202502088 | 202341488 |
| REN | rs7549807  | SNP_A-8317358     | C | T | 1  | 202290571 | 202502088 | 202345891 |
| REN | rs940654   | SNP_A-8665997     | A | C | 1  | 202290571 | 202502088 | 202347819 |
| REN | rs2250538  | SNP_A-1960774     | C | T | 1  | 202290571 | 202502088 | 202348515 |
| REN | rs2293336  | SNP_A-1980744     | C | T | 1  | 202290571 | 202502088 | 202348625 |
| REN | rs2037679  | SNP_A-1980745     | C | T | 1  | 202290571 | 202502088 | 202349561 |
| REN | rs16852893 | SNP_A-8344367     | T | A | 1  | 202290571 | 202502088 | 202354616 |
| REN | rs12092337 | SNP_A-2179125     | T | A | 1  | 202290571 | 202502088 | 202359648 |
| REN | rs12085092 | SNP_A-8425963     | G | A | 1  | 202290571 | 202502088 | 202359745 |
| REN | rs2975631  | SNP_A-8411646     | A | T | 1  | 202290571 | 202502088 | 202360112 |

|     |            |               |   |   |   |           |           |           |
|-----|------------|---------------|---|---|---|-----------|-----------|-----------|
| REN | rs16852933 | SNP_A-2109931 | C | T | 1 | 202290571 | 202502088 | 202362101 |
| REN | rs12730254 | SNP_A-8478353 | A | G | 1 | 202290571 | 202502088 | 202368044 |
| REN | rs6679960  | SNP_A-2268291 | A | T | 1 | 202290571 | 202502088 | 202371427 |
| REN | rs16852953 | SNP_A-1843824 | A | T | 1 | 202290571 | 202502088 | 202371798 |
| REN | rs10900553 | SNP_A-8325067 | C | T | 1 | 202290571 | 202502088 | 202374786 |
| REN | rs4951307  | SNP_A-2293103 | G | A | 1 | 202290571 | 202502088 | 202375116 |
| REN | rs3737656  | SNP_A-2314805 | T | C | 1 | 202290571 | 202502088 | 202377283 |
| REN | rs1106778  | SNP_A-8685833 | C | T | 1 | 202290571 | 202502088 | 202382171 |
| REN | rs940651   | SNP_A-8489688 | C | G | 1 | 202290571 | 202502088 | 202382209 |
| REN | rs4951310  | SNP_A-8305981 | A | G | 1 | 202290571 | 202502088 | 202384433 |
| REN | rs1997034  | SNP_A-1880165 | T | C | 1 | 202290571 | 202502088 | 202384983 |
| REN | rs11571093 | SNP_A-2253389 | C | G | 1 | 202290571 | 202502088 | 202390294 |
| REN | rs2887284  | SNP_A-2191870 | C | A | 1 | 202290571 | 202502088 | 202391271 |
| REN | rs2368564  | SNP_A-1980757 | C | T | 1 | 202290571 | 202502088 | 202391488 |
| REN | rs3795575  | SNP_A-8666007 | G | A | 1 | 202290571 | 202502088 | 202391712 |
| REN | rs11571085 | SNP_A-8380764 | T | C | 1 | 202290571 | 202502088 | 202394896 |
| REN | rs11571116 | SNP_A-8707288 | A | G | 1 | 202290571 | 202502088 | 202395460 |
| REN | rs1464816  | SNP_A-8717306 | T | G | 1 | 202290571 | 202502088 | 202395477 |
| REN | rs5707     | SNP_A-8307625 | C | A | 1 | 202290571 | 202502088 | 202396294 |
| REN | rs7521667  | SNP_A-8313532 | G | T | 1 | 202290571 | 202502088 | 202396750 |
| REN | rs11571082 | SNP_A-1914440 | T | C | 1 | 202290571 | 202502088 | 202397654 |
| REN | rs11571080 | SNP_A-8409826 | T | C | 1 | 202290571 | 202502088 | 202398254 |
| REN | rs11571103 | SNP_A-1905016 | A | G | 1 | 202290571 | 202502088 | 202398834 |
| REN | rs10900555 | SNP_A-2256856 | A | G | 1 | 202290571 | 202502088 | 202398933 |
| REN | rs6693954  | SNP_A-2113906 | T | A | 1 | 202290571 | 202502088 | 202399261 |
| REN | rs11571078 | SNP_A-8485287 | G | A | 1 | 202290571 | 202502088 | 202399797 |
| REN | rs11240688 | SNP_A-8389780 | G | A | 1 | 202290571 | 202502088 | 202401145 |
| REN | rs16853055 | SNP_A-8686217 | G | T | 1 | 202290571 | 202502088 | 202405925 |
| REN | rs16853059 | SNP_A-2260631 | T | C | 1 | 202290571 | 202502088 | 202406807 |
| REN | rs16853062 | SNP_A-2166246 | A | T | 1 | 202290571 | 202502088 | 202406841 |
| REN | rs10494849 | SNP_A-8666010 | C | T | 1 | 202290571 | 202502088 | 202410750 |
| REN | rs7548714  | SNP_A-8362994 | T | C | 1 | 202290571 | 202502088 | 202410872 |
| REN | rs7513165  | SNP_A-8679800 | C | T | 1 | 202290571 | 202502088 | 202413809 |
| REN | rs10900558 | SNP_A-2216394 | C | T | 1 | 202290571 | 202502088 | 202416146 |
| REN | rs4951315  | SNP_A-2093294 | A | C | 1 | 202290571 | 202502088 | 202423791 |
| REN | rs12040249 | SNP_A-8470045 | G | A | 1 | 202290571 | 202502088 | 202424851 |
| REN | rs7524621  | SNP_A-8677748 | A | G | 1 | 202290571 | 202502088 | 202427561 |
| REN | rs7538038  | SNP_A-2201887 | G | A | 1 | 202290571 | 202502088 | 202427649 |
| REN | rs4951316  | SNP_A-1807034 | C | T | 1 | 202290571 | 202502088 | 202428113 |
| REN | rs12097666 | SNP_A-4256358 | T | C | 1 | 202290571 | 202502088 | 202428835 |
| REN | rs4951319  | SNP_A-2155201 | T | C | 1 | 202290571 | 202502088 | 202428853 |
| REN | rs12568353 | SNP_A-8447148 | A | G | 1 | 202290571 | 202502088 | 202431314 |
| REN | rs3924587  | SNP_A-2313894 | C | T | 1 | 202290571 | 202502088 | 202432177 |
| REN | rs9726776  | SNP_A-8531854 | G | A | 1 | 202290571 | 202502088 | 202440010 |
| REN | rs4373805  | SNP_A-2192820 | A | G | 1 | 202290571 | 202502088 | 202442202 |
| REN | rs6685338  | SNP_A-4255017 | T | C | 1 | 202290571 | 202502088 | 202442351 |
| REN | rs11240698 | SNP_A-2123384 | T | A | 1 | 202290571 | 202502088 | 202443577 |
| REN | rs10900560 | SNP_A-8531843 | T | A | 1 | 202290571 | 202502088 | 202447249 |
| REN | rs4534452  | SNP_A-1980774 | A | G | 1 | 202290571 | 202502088 | 202451807 |
| REN | rs4631764  | SNP_A-2050370 | T | C | 1 | 202290571 | 202502088 | 202457131 |
| REN | rs7546241  | SNP_A-8527196 | A | G | 1 | 202290571 | 202502088 | 202460397 |
| REN | rs17333220 | SNP_A-8537227 | A | T | 1 | 202290571 | 202502088 | 202460414 |
| REN | rs11240700 | SNP_A-4271353 | C | T | 1 | 202290571 | 202502088 | 202462579 |
| REN | rs12026655 | SNP_A-8424337 | T | C | 1 | 202290571 | 202502088 | 202462643 |
| REN | rs11240701 | SNP_A-2247119 | A | G | 1 | 202290571 | 202502088 | 202462670 |
| REN | rs4581328  | SNP_A-4276728 | C | A | 1 | 202290571 | 202502088 | 202462950 |

|     |            |               |   |   |   |           |           |           |
|-----|------------|---------------|---|---|---|-----------|-----------|-----------|
| REN | rs4614318  | SNP_A-1785674 | C | T | 1 | 202290571 | 202502088 | 202463105 |
| REN | rs16853122 | SNP_A-8425216 | G | A | 1 | 202290571 | 202502088 | 202463279 |
| REN | rs12062034 | SNP_A-8471963 | A | G | 1 | 202290571 | 202502088 | 202463430 |
| REN | rs12760824 | SNP_A-8645136 | T | C | 1 | 202290571 | 202502088 | 202464248 |
| REN | rs6665623  | SNP_A-8695484 | A | G | 1 | 202290571 | 202502088 | 202466633 |
| REN | rs6683388  | SNP_A-2151149 | T | G | 1 | 202290571 | 202502088 | 202466883 |
| REN | rs6679037  | SNP_A-4213967 | T | C | 1 | 202290571 | 202502088 | 202467898 |
| REN | rs4434894  | SNP_A-2257929 | A | C | 1 | 202290571 | 202502088 | 202470274 |
| REN | rs6702751  | SNP_A-1820712 | C | A | 1 | 202290571 | 202502088 | 202478416 |
| REN | rs12031222 | SNP_A-2270673 | G | C | 1 | 202290571 | 202502088 | 202480337 |
| REN | rs4951327  | SNP_A-2046028 | A | C | 1 | 202290571 | 202502088 | 202480981 |
| REN | rs4951329  | SNP_A-8561500 | T | C | 1 | 202290571 | 202502088 | 202483033 |
| REN | rs4245724  | SNP_A-1906205 | C | T | 1 | 202290571 | 202502088 | 202483385 |
| REN | rs4951054  | SNP_A-8682847 | G | A | 1 | 202290571 | 202502088 | 202483769 |
| REN | rs10900568 | SNP_A-2095195 | C | T | 1 | 202290571 | 202502088 | 202486855 |
| REN | rs4453105  | SNP_A-8704880 | G | A | 1 | 202290571 | 202502088 | 202486985 |
| REN | rs11808198 | SNP_A-8466331 | T | C | 1 | 202290571 | 202502088 | 202490807 |
| REN | rs4951338  | SNP_A-4236424 | G | A | 1 | 202290571 | 202502088 | 202496675 |
| REN | rs4338423  | SNP_A-8415424 | T | C | 1 | 202290571 | 202502088 | 202497787 |
| REN | rs10751446 | SNP_A-4201677 | C | T | 1 | 202290571 | 202502088 | 202498123 |
| REN | rs4951056  | SNP_A-8553137 | T | C | 1 | 202290571 | 202502088 | 202499595 |
| REN | rs6675149  | SNP_A-8666024 | A | G | 1 | 202290571 | 202502088 | 202500399 |
