# Supplementary material for: Computational Analysis of Candidate Disease Genes and Variants for Salt-Sensitive Hypertension in Indigenous Southern Africans
Source: PubMed Central journal article supplement (PMC2946338; doi:10.1371/journal.pone.0012989), 2010-09-27
Supplement: pone.0012989.s003.pdf [file pone.0012989.s003.pdf]

**Supplementary data file S3. Final Scoring matrix for all genes**

| ensembl_id      | adrenergic_sympathetic | atrial_natriuretic_peptide | dopamine_receptor | renin_angiotensin_aldosterone | sodium_transport | sodium_reabsorption_kidney | (sodium_reabsorption)_kidney | (sodium_excretion)_kidney | sodium_excretion_kidney | low_renin | aldosterone_levels | salt_sensitivity | hypertension_associated | Total |
|-----------------|------------------------|----------------------------|-------------------|-------------------------------|------------------|----------------------------|------------------------------|---------------------------|-------------------------|-----------|--------------------|------------------|-------------------------|-------|
| ENSG00000152266 | ■                      |                            | ■                 |                               |                  | ■                          | ■                            | ■                         | ■                       |           |                    |                  |                         | 6     |
| ENSG00000144891 |                        |                            | ■                 | ■                             |                  | ■                          | ■                            | ■                         | ■                       | ■         |                    |                  |                         | 6     |
| ENSG00000151617 | ■                      |                            | ■                 |                               |                  | ■                          | ■                            | ■                         | ■                       |           | ■                  |                  |                         | 5     |
| ENSG00000135744 |                        |                            |                   | ■                             |                  | ■                          | ■                            | ■                         | ■                       |           | ■                  |                  | ■                       | 5     |
| ENSG00000143839 |                        |                            |                   | ■                             |                  | ■                          | ■                            | ■                         | ■                       |           | ■                  |                  | ■                       | 5     |
| ENSG00000107937 | ■                      |                            |                   |                               |                  | ■                          | ■                            | ■                         | ■                       |           | ■                  |                  |                         | 4     |
| ENSG00000138622 |                        |                            | ■                 | ■                             |                  | ■                          | ■                            | ■                         | ■                       |           |                    |                  | ■                       | 4     |
| ENSG00000136160 |                        |                            | ■                 | ■                             |                  | ■                          | ■                            | ■                         | ■                       |           |                    |                  | ■                       | 4     |
| ENSG00000099822 | ■                      |                            | ■                 | ■                             |                  | ■                          | ■                            | ■                         | ■                       |           |                    |                  | ■                       | 4     |
| ENSG00000214274 |                        |                            | ■                 | ■                             |                  | ■                          | ■                            | ■                         | ■                       |           | ■                  |                  |                         | 4     |
| ENSG00000124721 |                        |                            |                   |                               |                  | ■                          | ■                            | ■                         | ■                       | ■         |                    |                  |                         | 4     |
| ENSG00000175206 |                        |                            |                   |                               |                  | ■                          | ■                            | ■                         | ■                       | ■         |                    |                  | ■                       | 4     |
| ENSG00000129965 |                        |                            |                   |                               |                  | ■                          | ■                            | ■                         | ■                       |           |                    |                  | ■                       | 4     |
| ENSG00000163631 |                        |                            |                   |                               |                  | ■                          | ■                            | ■                         | ■                       |           |                    |                  |                         | 4     |
| ENSG00000137992 |                        |                            |                   |                               |                  | ■                          | ■                            | ■                         | ■                       |           |                    |                  |                         | 4     |
| ENSG00000197956 |                        |                            |                   |                               |                  | ■                          | ■                            | ■                         | ■                       |           |                    |                  |                         | 4     |
| ENSG00000100359 |                        |                            |                   |                               |                  | ■                          | ■                            | ■                         | ■                       |           |                    |                  |                         | 4     |
| ENSG00000159640 |                        |                            |                   |                               |                  | ■                          | ■                            | ■                         | ■                       |           |                    |                  | ■                       | 4     |
| ENSG00000162711 |                        |                            |                   |                               |                  | ■                          | ■                            | ■                         | ■                       |           |                    |                  | ■                       | 4     |
| ENSG00000078401 |                        |                            |                   |                               |                  | ■                          | ■                            | ■                         | ■                       | ■         |                    |                  | ■                       | 4     |
| ENSG00000180772 | ■                      |                            | ■                 | ■                             |                  | ■                          | ■                            | ■                         | ■                       |           |                    |                  | ■                       | 3.5   |
| ENSG00000007171 | ■                      | ■                          | ■                 | ■                             |                  | ■                          | ■                            | ■                         | ■                       |           |                    |                  | ■                       | 3.5   |
| ENSG00000198873 | ■                      | ■                          | ■                 | ■                             |                  | ■                          | ■                            | ■                         | ■                       |           |                    |                  |                         | 3     |
| ENSG00000215782 | ■                      | ■                          | ■                 | ■                             |                  | ■                          | ■                            | ■                         | ■                       |           |                    |                  |                         | 3     |
| ENSG00000121807 | ■                      | ■                          | ■                 | ■                             |                  | ■                          | ■                            | ■                         | ■                       |           |                    |                  |                         | 3     |
| ENSG00000128271 | ■                      | ■                          | ■                 | ■                             |                  | ■                          | ■                            | ■                         | ■                       |           |                    |                  |                         | 3     |
| ENSG00000091428 | ■                      | ■                          | ■                 | ■                             |                  | ■                          | ■                            | ■                         | ■                       |           |                    |                  |                         | 3     |
| ENSG00000082556 | ■                      | ■                          | ■                 | ■                             |                  | ■                          | ■                            | ■                         | ■                       |           |                    |                  |                         | 3     |
| ENSG00000183134 | ■                      | ■                          | ■                 | ■                             |                  | ■                          | ■                            | ■                         | ■                       |           |                    |                  |                         | 3     |
| ENSG00000185149 | ■                      | ■                          | ■                 | ■                             |                  | ■                          | ■                            | ■                         | ■                       |           |                    |                  |                         | 3     |
| ENSG00000166148 | ■                      | ■                          | ■                 | ■                             |                  | ■                          | ■                            | ■                         | ■                       |           |                    |                  |                         | 3     |
| ENSG00000171596 | ■                      | ■                          | ■                 | ■                             |                  | ■                          | ■                            | ■                         | ■                       |           |                    |                  |                         | 3     |
| ENSG00000197405 | ■                      | ■                          | ■                 | ■                             |                  | ■                          | ■                            | ■                         | ■                       |           |                    |                  |                         | 3     |
| ENSG00000138669 | ■                      | ■                          | ■                 | ■                             |                  | ■                          | ■                            | ■                         | ■                       |           |                    |                  |                         | 3     |
| ENSG00000185532 | ■                      | ■                          | ■                 | ■                             |                  | ■                          | ■                            | ■                         | ■                       |           |                    |                  |                         | 3     |
| ENSG00000005249 | ■                      | ■                          | ■                 | ■                             |                  | ■                          | ■                            | ■                         | ■                       |           |                    |                  |                         | 3     |
| ENSG00000170289 | ■                      | ■                          | ■                 | ■                             |                  | ■                          | ■                            | ■                         | ■                       |           |                    |                  |                         | 3     |
| ENSG00000164588 | ■                      | ■                          | ■                 | ■                             |                  | ■                          | ■                            | ■                         | ■                       |           |                    |                  |                         | 3     |
| ENSG00000143630 | ■                      | ■                          | ■                 | ■                             |                  | ■                          | ■                            | ■                         | ■                       |           |                    |                  |                         | 3     |
| ENSG00000136237 |                        |                            |                   |                               |                  | ■                          | ■                            | ■                         | ■                       |           | ■                  |                  |                         | 3     |
| ENSG00000164047 |                        |                            |                   |                               |                  | ■                          | ■                            | ■                         | ■                       |           | ■                  |                  |                         | 3     |
| ENSG00000101200 |                        |                            |                   |                               |                  | ■                          | ■                            | ■                         | ■                       |           | ■                  |                  |                         | 3     |
| ENSG00000174827 |                        |                            |                   |                               |                  | ■                          | ■                            | ■                         | ■                       |           | ■                  |                  |                         | 3     |





|                 |  |  |  |  |   |
|-----------------|--|--|--|--|---|
| ENSG00000144648 |  |  |  |  | 2 |
| ENSG00000171201 |  |  |  |  | 2 |
| ENSG00000056291 |  |  |  |  | 2 |
| ENSG00000186912 |  |  |  |  | 2 |
| ENSG00000173585 |  |  |  |  | 2 |
| ENSG00000172215 |  |  |  |  | 2 |
| ENSG00000173578 |  |  |  |  | 2 |
| ENSG00000099864 |  |  |  |  | 2 |
| ENSG00000163823 |  |  |  |  | 2 |
| ENSG00000183625 |  |  |  |  | 2 |
| ENSG00000160791 |  |  |  |  | 2 |
| ENSG00000170425 |  |  |  |  | 2 |
| ENSG00000108557 |  |  |  |  | 2 |
| ENSG00000169429 |  |  |  |  | 2 |
| ENSG00000186810 |  |  |  |  | 2 |
| ENSG00000204174 |  |  |  |  | 2 |
| ENSG00000213694 |  |  |  |  | 2 |
| ENSG00000138756 |  |  |  |  | 2 |
| ENSG00000173198 |  |  |  |  | 2 |
| ENSG00000147145 |  |  |  |  | 2 |
| ENSG00000078589 |  |  |  |  | 2 |
| ENSG00000188779 |  |  |  |  | 2 |
| ENSG00000187140 |  |  |  |  | 2 |
| ENSG00000129911 |  |  |  |  | 2 |
| ENSG00000134817 |  |  |  |  | 2 |
| ENSG00000165617 |  |  |  |  | 2 |
| ENSG00000182759 |  |  |  |  | 2 |
| ENSG00000125910 |  |  |  |  | 2 |
| ENSG00000204218 |  |  |  |  | 2 |
| ENSG00000136928 |  |  |  |  | 2 |
| ENSG00000050628 |  |  |  |  | 2 |
| ENSG00000169951 |  |  |  |  | 2 |
| ENSG00000164082 |  |  |  |  | 2 |
| ENSG00000125510 |  |  |  |  | 2 |
| ENSG00000124493 |  |  |  |  | 2 |
| ENSG00000160973 |  |  |  |  | 2 |
| ENSG00000198121 |  |  |  |  | 2 |
| ENSG00000147246 |  |  |  |  | 2 |
| ENSG00000198822 |  |  |  |  | 2 |
| ENSG00000196739 |  |  |  |  | 2 |
| ENSG00000181291 |  |  |  |  | 2 |
| ENSG00000004948 |  |  |  |  | 2 |
| ENSG00000125730 |  |  |  |  | 2 |
| ENSG00000112164 |  |  |  |  | 2 |
| ENSG00000164270 |  |  |  |  | 2 |
| ENSG00000169252 |  |  |  |  | 2 |
| ENSG00000180535 |  |  |  |  | 2 |
| ENSG00000179097 |  |  |  |  | 2 |
| ENSG00000154165 |  |  |  |  | 2 |
| ENSG00000102239 |  |  |  |  | 2 |
| ENSG00000171475 |  |  |  |  | 2 |
| ENSG00000126353 |  |  |  |  | 2 |
| ENSG00000170989 |  |  |  |  | 2 |
| ENSG00000170214 |  |  |  |  | 2 |
| ENSG00000166856 |  |  |  |  | 2 |
| ENSG00000151577 |  |  |  |  | 2 |





|                 |  |  |  |  |     |
|-----------------|--|--|--|--|-----|
| ENSG00000163485 |  |  |  |  | 1.5 |
| ENSG00000100031 |  |  |  |  | 1.5 |
| ENSG00000066230 |  |  |  |  | 1.5 |
| ENSG00000132932 |  |  |  |  | 1.5 |
| ENSG00000124813 |  |  |  |  | 1.5 |
| ENSG00000180210 |  |  |  |  | 1.5 |
| ENSG00000143199 |  |  |  |  | 1.5 |
| ENSG00000074803 |  |  |  |  | 1.5 |
| ENSG00000153767 |  |  |  |  | 1.5 |
| ENSG00000197406 |  |  |  |  | 1.5 |
| ENSG00000108784 |  |  |  |  | 1.5 |
| ENSG00000070915 |  |  |  |  | 1.5 |
| ENSG00000035928 |  |  |  |  | 1.5 |
| ENSG00000073756 |  |  |  |  | 1.5 |
| ENSG00000106258 |  |  |  |  | 1.5 |
| ENSG00000121691 |  |  |  |  | 1.5 |
| ENSG00000163956 |  |  |  |  | 1.5 |
| ENSG00000165471 |  |  |  |  | 1.5 |
| ENSG00000215522 |  |  |  |  | 1.5 |
| ENSG00000137332 |  |  |  |  | 1.5 |
| ENSG00000204580 |  |  |  |  | 1.5 |
| ENSG00000188610 |  |  |  |  | 1   |
| ENSG00000132698 |  |  |  |  | 1   |
| ENSG00000197959 |  |  |  |  | 1   |
| ENSG00000215823 |  |  |  |  | 1   |
| ENSG00000215814 |  |  |  |  | 1   |
| ENSG00000215813 |  |  |  |  | 1   |
| ENSG00000215801 |  |  |  |  | 1   |
| ENSG00000116688 |  |  |  |  | 1   |
| ENSG00000132881 |  |  |  |  | 1   |
| ENSG00000215634 |  |  |  |  | 1   |
| ENSG00000206492 |  |  |  |  | 1   |
| ENSG00000173213 |  |  |  |  | 1   |
| ENSG00000206412 |  |  |  |  | 1   |
| ENSG00000206418 |  |  |  |  | 1   |
| ENSG00000168461 |  |  |  |  | 1   |
| ENSG00000183311 |  |  |  |  | 1   |
| ENSG00000137379 |  |  |  |  | 1   |
| ENSG00000161149 |  |  |  |  | 1   |
| ENSG00000215451 |  |  |  |  | 1   |
| ENSG00000149656 |  |  |  |  | 1   |
| ENSG00000088387 |  |  |  |  | 1   |
| ENSG00000070831 |  |  |  |  | 1   |
| ENSG00000198033 |  |  |  |  | 1   |
| ENSG00000125780 |  |  |  |  | 1   |
| ENSG00000178605 |  |  |  |  | 1   |
| ENSG00000139890 |  |  |  |  | 1   |
| ENSG00000166922 |  |  |  |  | 1   |
| ENSG00000176014 |  |  |  |  | 1   |
| ENSG00000183785 |  |  |  |  | 1   |
| ENSG00000122035 |  |  |  |  | 1   |
| ENSG00000120555 |  |  |  |  | 1   |
| ENSG00000196503 |  |  |  |  | 1   |
| ENSG00000185739 |  |  |  |  | 1   |
| ENSG00000215093 |  |  |  |  | 1   |
| ENSG00000170590 |  |  |  |  | 1   |























|                 |  |  |   |
|-----------------|--|--|---|
| ENSG00000179799 |  |  | 1 |
| ENSG00000006638 |  |  | 1 |
| ENSG00000164825 |  |  | 1 |
| ENSG00000105278 |  |  | 1 |
| ENSG00000177306 |  |  | 1 |
| ENSG00000205847 |  |  | 1 |
| ENSG00000159692 |  |  | 1 |
| ENSG00000171711 |  |  | 1 |
| ENSG00000119919 |  |  | 1 |
| ENSG00000152207 |  |  | 1 |
| ENSG00000177679 |  |  | 1 |
| ENSG00000102539 |  |  | 1 |
| ENSG00000196143 |  |  | 1 |
| ENSG00000182652 |  |  | 1 |
| ENSG00000176299 |  |  | 1 |
| ENSG00000176294 |  |  | 1 |
| ENSG00000169249 |  |  | 1 |
| ENSG00000165762 |  |  | 1 |
| ENSG00000176281 |  |  | 1 |
| ENSG00000155249 |  |  | 1 |
| ENSG00000205331 |  |  | 1 |
| ENSG00000169488 |  |  | 1 |
| ENSG00000169484 |  |  | 1 |
| ENSG00000176253 |  |  | 1 |
| ENSG00000176246 |  |  | 1 |
| ENSG00000176230 |  |  | 1 |
| ENSG00000184394 |  |  | 1 |
| ENSG00000196832 |  |  | 1 |
| ENSG00000176219 |  |  | 1 |
| ENSG00000176198 |  |  | 1 |
| ENSG00000088247 |  |  | 1 |
| ENSG00000214344 |  |  | 1 |
| ENSG00000183444 |  |  | 1 |
| ENSG00000179170 |  |  | 1 |
| ENSG00000121904 |  |  | 1 |
| ENSG00000135540 |  |  | 1 |
| ENSG00000168992 |  |  | 1 |
| ENSG00000186629 |  |  | 1 |
| ENSG00000183706 |  |  | 1 |
| ENSG00000182974 |  |  | 1 |
| ENSG00000178336 |  |  | 1 |
| ENSG00000183248 |  |  | 1 |
| ENSG00000181803 |  |  | 1 |
| ENSG00000166225 |  |  | 1 |
| ENSG00000116560 |  |  | 1 |
| ENSG00000112419 |  |  | 1 |
| ENSG00000131142 |  |  | 1 |
| ENSG00000214251 |  |  | 1 |
| ENSG00000105061 |  |  | 1 |
| ENSG00000174948 |  |  | 1 |
| ENSG00000174930 |  |  | 1 |
| ENSG00000164488 |  |  | 1 |
| ENSG00000181214 |  |  | 1 |
| ENSG00000196703 |  |  | 1 |
| ENSG00000197849 |  |  | 1 |
| ENSG00000165804 |  |  | 1 |

|                 |  |  |  |   |
|-----------------|--|--|--|---|
| ENSG00000169327 |  |  |  | 1 |
| ENSG00000116871 |  |  |  | 1 |
| ENSG00000131061 |  |  |  | 1 |
| ENSG00000076344 |  |  |  | 1 |
| ENSG00000184984 |  |  |  | 1 |
| ENSG00000155269 |  |  |  | 1 |
| ENSG00000169777 |  |  |  | 1 |
| ENSG00000139746 |  |  |  | 1 |
| ENSG00000169208 |  |  |  | 1 |
| ENSG00000169202 |  |  |  | 1 |
| ENSG00000108370 |  |  |  | 1 |
| ENSG00000185187 |  |  |  | 1 |
| ENSG00000145147 |  |  |  | 1 |
| ENSG00000175509 |  |  |  | 1 |
| ENSG00000125631 |  |  |  | 1 |
| ENSG00000166073 |  |  |  | 1 |
| ENSG00000111707 |  |  |  | 1 |
| ENSG00000167281 |  |  |  | 1 |
| ENSG00000127588 |  |  |  | 1 |
| ENSG00000162009 |  |  |  | 1 |
| ENSG00000125245 |  |  |  | 1 |
| ENSG00000163394 |  |  |  | 1 |
| ENSG00000198173 |  |  |  | 1 |
| ENSG00000176923 |  |  |  | 1 |
| ENSG00000185666 |  |  |  | 1 |
| ENSG00000104290 |  |  |  | 1 |
| ENSG00000180914 |  |  |  | 1 |
| ENSG00000010017 |  |  |  | 1 |
| ENSG00000179420 |  |  |  | 1 |
| ENSG00000176510 |  |  |  | 1 |
| ENSG00000170356 |  |  |  | 1 |
| ENSG00000050393 |  |  |  | 1 |
| ENSG00000157827 |  |  |  | 1 |
| ENSG00000133619 |  |  |  | 1 |
| ENSG00000171657 |  |  |  | 1 |
| ENSG00000183016 |  |  |  | 1 |
| ENSG00000179862 |  |  |  | 1 |
| ENSG00000188778 |  |  |  | 1 |
| ENSG00000129691 |  |  |  | 1 |
| ENSG00000184166 |  |  |  | 1 |
| ENSG00000183024 |  |  |  | 1 |
| ENSG00000172150 |  |  |  | 1 |
| ENSG00000163703 |  |  |  | 1 |
| ENSG00000172146 |  |  |  | 1 |
| ENSG00000180090 |  |  |  | 1 |
| ENSG00000166159 |  |  |  | 1 |
| ENSG00000180068 |  |  |  | 1 |
| ENSG00000180016 |  |  |  | 1 |
| ENSG00000159961 |  |  |  | 1 |
| ENSG00000127780 |  |  |  | 1 |
| ENSG00000053702 |  |  |  | 1 |
| ENSG00000107262 |  |  |  | 1 |
| ENSG00000078246 |  |  |  | 1 |
| ENSG00000157017 |  |  |  | 1 |
| ENSG00000183473 |  |  |  | 1 |
| ENSG00000164849 |  |  |  | 1 |

|                 |  |  |  |   |
|-----------------|--|--|--|---|
| ENSG00000148426 |  |  |  | 1 |
| ENSG00000196639 |  |  |  | 1 |
| ENSG00000008056 |  |  |  | 1 |
| ENSG00000126767 |  |  |  | 1 |
| ENSG00000181963 |  |  |  | 1 |
| ENSG00000196778 |  |  |  | 1 |
| ENSG00000197790 |  |  |  | 1 |
| ENSG00000175609 |  |  |  | 1 |
| ENSG00000197428 |  |  |  | 1 |
| ENSG00000180785 |  |  |  | 1 |
| ENSG00000167332 |  |  |  | 1 |
| ENSG00000188069 |  |  |  | 1 |
| ENSG00000176937 |  |  |  | 1 |
| ENSG00000176925 |  |  |  | 1 |
| ENSG00000176922 |  |  |  | 1 |
| ENSG00000176900 |  |  |  | 1 |
| ENSG00000083168 |  |  |  | 1 |
| ENSG00000176895 |  |  |  | 1 |
| ENSG00000176893 |  |  |  | 1 |
| ENSG00000176879 |  |  |  | 1 |
| ENSG00000205497 |  |  |  | 1 |
| ENSG00000205496 |  |  |  | 1 |
| ENSG00000176798 |  |  |  | 1 |
| ENSG00000205495 |  |  |  | 1 |
| ENSG00000176787 |  |  |  | 1 |
| ENSG00000205494 |  |  |  | 1 |
| ENSG00000171944 |  |  |  | 1 |
| ENSG00000182070 |  |  |  | 1 |
| ENSG00000176742 |  |  |  | 1 |
| ENSG00000183251 |  |  |  | 1 |
| ENSG00000184881 |  |  |  | 1 |
| ENSG00000176239 |  |  |  | 1 |
| ENSG00000167355 |  |  |  | 1 |
| ENSG00000167360 |  |  |  | 1 |
| ENSG00000167359 |  |  |  | 1 |
| ENSG00000187918 |  |  |  | 1 |
| ENSG00000181609 |  |  |  | 1 |
| ENSG00000181616 |  |  |  | 1 |
| ENSG00000168124 |  |  |  | 1 |
| ENSG00000168131 |  |  |  | 1 |
| ENSG00000124657 |  |  |  | 1 |
| ENSG00000124191 |  |  |  | 1 |
| ENSG00000168158 |  |  |  | 1 |
| ENSG00000015285 |  |  |  | 1 |
| ENSG00000181023 |  |  |  | 1 |
| ENSG00000181009 |  |  |  | 1 |
| ENSG00000181001 |  |  |  | 1 |
| ENSG00000180988 |  |  |  | 1 |
| ENSG00000183269 |  |  |  | 1 |
| ENSG00000180974 |  |  |  | 1 |
| ENSG00000183389 |  |  |  | 1 |
| ENSG00000180934 |  |  |  | 1 |
| ENSG00000180919 |  |  |  | 1 |
| ENSG00000175485 |  |  |  | 1 |
| ENSG00000184574 |  |  |  | 1 |
| ENSG00000166311 |  |  |  | 1 |

|                 |  |  |  |   |
|-----------------|--|--|--|---|
| ENSG00000204704 |  |  |  | 1 |
| ENSG00000179921 |  |  |  | 1 |
| ENSG00000204703 |  |  |  | 1 |
| ENSG00000112462 |  |  |  | 1 |
| ENSG00000204695 |  |  |  | 1 |
| ENSG00000183729 |  |  |  | 1 |
| ENSG00000168787 |  |  |  | 1 |
| ENSG00000206474 |  |  |  | 1 |
| ENSG00000204694 |  |  |  | 1 |
| ENSG00000204688 |  |  |  | 1 |
| ENSG00000204687 |  |  |  | 1 |
| ENSG00000148481 |  |  |  | 1 |
| ENSG00000110811 |  |  |  | 1 |
| ENSG00000168140 |  |  |  | 1 |
| ENSG00000188124 |  |  |  | 1 |
| ENSG00000170803 |  |  |  | 1 |
| ENSG00000184933 |  |  |  | 1 |
| ENSG00000111664 |  |  |  | 1 |
| ENSG00000166363 |  |  |  | 1 |
| ENSG00000170790 |  |  |  | 1 |
| ENSG00000170782 |  |  |  | 1 |
| ENSG00000166368 |  |  |  | 1 |
| ENSG00000178358 |  |  |  | 1 |
| ENSG00000204657 |  |  |  | 1 |
| ENSG00000140274 |  |  |  | 1 |
| ENSG00000183303 |  |  |  | 1 |
| ENSG00000182334 |  |  |  | 1 |
| ENSG00000175393 |  |  |  | 1 |
| ENSG00000170683 |  |  |  | 1 |
| ENSG00000137098 |  |  |  | 1 |
| ENSG00000168828 |  |  |  | 1 |
| ENSG00000122718 |  |  |  | 1 |
| ENSG00000164651 |  |  |  | 1 |
| ENSG00000046889 |  |  |  | 1 |
| ENSG00000136235 |  |  |  | 1 |
| ENSG00000204646 |  |  |  | 1 |
| ENSG00000104043 |  |  |  | 1 |
| ENSG00000182083 |  |  |  | 1 |
| ENSG00000168267 |  |  |  | 1 |
| ENSG00000184194 |  |  |  | 1 |
| ENSG00000145216 |  |  |  | 1 |
| ENSG00000151025 |  |  |  | 1 |
| ENSG00000121377 |  |  |  | 1 |
| ENSG00000121314 |  |  |  | 1 |
| ENSG00000121381 |  |  |  | 1 |
| ENSG00000121318 |  |  |  | 1 |
| ENSG00000212128 |  |  |  | 1 |
| ENSG00000134551 |  |  |  | 1 |
| ENSG00000212127 |  |  |  | 1 |
| ENSG00000212126 |  |  |  | 1 |
| ENSG00000212125 |  |  |  | 1 |
| ENSG00000212124 |  |  |  | 1 |
| ENSG00000186136 |  |  |  | 1 |
| ENSG00000105997 |  |  |  | 1 |
| ENSG00000069966 |  |  |  | 1 |
| ENSG00000183150 |  |  |  | 1 |

|                 |  |  |   |
|-----------------|--|--|---|
| ENSG00000136754 |  |  | 1 |
| ENSG00000013588 |  |  | 1 |
| ENSG00000111291 |  |  | 1 |
| ENSG00000179094 |  |  | 1 |
| ENSG00000139874 |  |  | 1 |
| ENSG00000179826 |  |  | 1 |
| ENSG00000179817 |  |  | 1 |
| ENSG00000084463 |  |  | 1 |
| ENSG00000181104 |  |  | 1 |
| ENSG00000078549 |  |  | 1 |
| ENSG00000187550 |  |  | 1 |
| ENSG00000109163 |  |  | 1 |
| ENSG00000170255 |  |  | 1 |
| ENSG00000114812 |  |  | 1 |
| ENSG00000183695 |  |  | 1 |
| ENSG00000167191 |  |  | 1 |
| ENSG00000180269 |  |  | 1 |
| ENSG00000169006 |  |  | 1 |
| ENSG00000187258 |  |  | 1 |
| ENSG00000176695 |  |  | 1 |
| ENSG00000204612 |  |  | 1 |
| ENSG00000109208 |  |  | 1 |
| ENSG00000204463 |  |  | 1 |
| ENSG00000187037 |  |  | 1 |
| ENSG00000038427 |  |  | 1 |
| ENSG00000158813 |  |  | 1 |
| ENSG00000205213 |  |  | 1 |
| ENSG00000106536 |  |  | 1 |
| ENSG00000124089 |  |  | 1 |
| ENSG00000178015 |  |  | 1 |
| ENSG00000177283 |  |  | 1 |
| ENSG00000164930 |  |  | 1 |
| ENSG00000143006 |  |  | 1 |
| ENSG00000107562 |  |  | 1 |
| ENSG00000174417 |  |  | 1 |
| ENSG00000116014 |  |  | 1 |
| ENSG00000172678 |  |  | 1 |
| ENSG00000072310 |  |  | 1 |
| ENSG00000163734 |  |  | 1 |
| ENSG00000081041 |  |  | 1 |
| ENSG00000186469 |  |  | 1 |
| ENSG00000188603 |  |  | 1 |
| ENSG00000084693 |  |  | 1 |
| ENSG00000138755 |  |  | 1 |
| ENSG00000168229 |  |  | 1 |
| ENSG00000125384 |  |  | 1 |
| ENSG00000136286 |  |  | 1 |
| ENSG00000136960 |  |  | 1 |
| ENSG00000164054 |  |  | 1 |
| ENSG00000163792 |  |  | 1 |
| ENSG00000099625 |  |  | 1 |
| ENSG00000087495 |  |  | 1 |
| ENSG00000163794 |  |  | 1 |
| ENSG00000156787 |  |  | 1 |
| ENSG00000130699 |  |  | 1 |
| ENSG00000101180 |  |  | 1 |

|                 |  |  |   |
|-----------------|--|--|---|
| ENSG00000071626 |  |  | 1 |
| ENSG00000175216 |  |  | 1 |
| ENSG00000147138 |  |  | 1 |
| ENSG00000168672 |  |  | 1 |
| ENSG00000168175 |  |  | 1 |
| ENSG00000168944 |  |  | 1 |
| ENSG00000101188 |  |  | 1 |
| ENSG00000092758 |  |  | 1 |
| ENSG00000167371 |  |  | 1 |
| ENSG00000101190 |  |  | 1 |
| ENSG00000149658 |  |  | 1 |
| ENSG00000000003 |  |  | 1 |
| ENSG00000213611 |  |  | 1 |
| ENSG00000175619 |  |  | 1 |
| ENSG00000172208 |  |  | 1 |
| ENSG00000176567 |  |  | 1 |
| ENSG00000176555 |  |  | 1 |
| ENSG00000176547 |  |  | 1 |
| ENSG00000205046 |  |  | 1 |
| ENSG00000172640 |  |  | 1 |
| ENSG00000197376 |  |  | 1 |
| ENSG00000142864 |  |  | 1 |
| ENSG00000188763 |  |  | 1 |
| ENSG00000186419 |  |  | 1 |
| ENSG00000178306 |  |  | 1 |
| ENSG00000176529 |  |  | 1 |
| ENSG00000185926 |  |  | 1 |
| ENSG00000204882 |  |  | 1 |
| ENSG00000181961 |  |  | 1 |
| ENSG00000181958 |  |  | 1 |
| ENSG00000181939 |  |  | 1 |
| ENSG00000181935 |  |  | 1 |
| ENSG00000172188 |  |  | 1 |
| ENSG00000181927 |  |  | 1 |
| ENSG00000174982 |  |  | 1 |
| ENSG00000181903 |  |  | 1 |
| ENSG00000198877 |  |  | 1 |
| ENSG00000172380 |  |  | 1 |
| ENSG00000186113 |  |  | 1 |
| ENSG00000186117 |  |  | 1 |
| ENSG00000186119 |  |  | 1 |
| ENSG00000205030 |  |  | 1 |
| ENSG00000205029 |  |  | 1 |
| ENSG00000187612 |  |  | 1 |
| ENSG00000167825 |  |  | 1 |
| ENSG00000174970 |  |  | 1 |
| ENSG00000149133 |  |  | 1 |
| ENSG00000181785 |  |  | 1 |
| ENSG00000172154 |  |  | 1 |
| ENSG00000181767 |  |  | 1 |
| ENSG00000181761 |  |  | 1 |
| ENSG00000167822 |  |  | 1 |
| ENSG00000181752 |  |  | 1 |
| ENSG00000174957 |  |  | 1 |
| ENSG00000181718 |  |  | 1 |
| ENSG00000172489 |  |  | 1 |

|                 |  |  |   |
|-----------------|--|--|---|
| ENSG00000181698 |  |  | 1 |
| ENSG00000181693 |  |  | 1 |
| ENSG00000181689 |  |  | 1 |
| ENSG00000150261 |  |  | 1 |
| ENSG00000172487 |  |  | 1 |
| ENSG00000174942 |  |  | 1 |
| ENSG00000150269 |  |  | 1 |
| ENSG00000174937 |  |  | 1 |
| ENSG00000181371 |  |  | 1 |
| ENSG00000172464 |  |  | 1 |
| ENSG00000172459 |  |  | 1 |
| ENSG00000174914 |  |  | 1 |
| ENSG00000172457 |  |  | 1 |
| ENSG00000181273 |  |  | 1 |
| ENSG00000183908 |  |  | 1 |
| ENSG00000169221 |  |  | 1 |
| ENSG00000186907 |  |  | 1 |
| ENSG00000181619 |  |  | 1 |
| ENSG00000139970 |  |  | 1 |
| ENSG00000186509 |  |  | 1 |
| ENSG00000172381 |  |  | 1 |
| ENSG00000172377 |  |  | 1 |
| ENSG00000186513 |  |  | 1 |
| ENSG00000197887 |  |  | 1 |
| ENSG00000172774 |  |  | 1 |
| ENSG00000180475 |  |  | 1 |
| ENSG00000172772 |  |  | 1 |
| ENSG00000197786 |  |  | 1 |
| ENSG00000172769 |  |  | 1 |
| ENSG00000172365 |  |  | 1 |
| ENSG00000172362 |  |  | 1 |
| ENSG00000198283 |  |  | 1 |
| ENSG00000178719 |  |  | 1 |
| ENSG00000075073 |  |  | 1 |
| ENSG00000176495 |  |  | 1 |
| ENSG00000172324 |  |  | 1 |
| ENSG00000172320 |  |  | 1 |
| ENSG00000166884 |  |  | 1 |
| ENSG00000176200 |  |  | 1 |
| ENSG00000172742 |  |  | 1 |
| ENSG00000172289 |  |  | 1 |
| ENSG00000171700 |  |  | 1 |
| ENSG00000081059 |  |  | 1 |
| ENSG00000180929 |  |  | 1 |
| ENSG00000125522 |  |  | 1 |
| ENSG00000110844 |  |  | 1 |
| ENSG00000149534 |  |  | 1 |
| ENSG00000096395 |  |  | 1 |
| ENSG00000099381 |  |  | 1 |
| ENSG00000137309 |  |  | 1 |
| ENSG00000186881 |  |  | 1 |
| ENSG00000148136 |  |  | 1 |
| ENSG00000204246 |  |  | 1 |
| ENSG00000186943 |  |  | 1 |
| ENSG00000204245 |  |  | 1 |
| ENSG00000179074 |  |  | 1 |

|                 |  |  |   |
|-----------------|--|--|---|
| ENSG00000136839 |  |  | 1 |
| ENSG00000179055 |  |  | 1 |
| ENSG00000162881 |  |  | 1 |
| ENSG00000160949 |  |  | 1 |
| ENSG00000133131 |  |  | 1 |
| ENSG00000167987 |  |  | 1 |
| ENSG00000148143 |  |  | 1 |
| ENSG00000122420 |  |  | 1 |
| ENSG00000169758 |  |  | 1 |
| ENSG00000117114 |  |  | 1 |
| ENSG00000138279 |  |  | 1 |
| ENSG00000120738 |  |  | 1 |
| ENSG00000135180 |  |  | 1 |
| ENSG00000143933 |  |  | 1 |
| ENSG00000109320 |  |  | 1 |
| ENSG00000174021 |  |  | 1 |
| ENSG00000171133 |  |  | 1 |
| ENSG00000184261 |  |  | 1 |
| ENSG00000171517 |  |  | 1 |
| ENSG00000059769 |  |  | 1 |
| ENSG00000169836 |  |  | 1 |
| ENSG00000120306 |  |  | 1 |
| ENSG00000138039 |  |  | 1 |
| ENSG00000170820 |  |  | 1 |
| ENSG00000131725 |  |  | 1 |
| ENSG00000162188 |  |  | 1 |
| ENSG00000213523 |  |  | 1 |
| ENSG00000119737 |  |  | 1 |
| ENSG00000119431 |  |  | 1 |
| ENSG00000010244 |  |  | 1 |
| ENSG00000168539 |  |  | 1 |
| ENSG00000180245 |  |  | 1 |
| ENSG00000157240 |  |  | 1 |
| ENSG00000167771 |  |  | 1 |
| ENSG00000180316 |  |  | 1 |
| ENSG00000106952 |  |  | 1 |
| ENSG00000006075 |  |  | 1 |
| ENSG00000148604 |  |  | 1 |
| ENSG00000107771 |  |  | 1 |
| ENSG00000122375 |  |  | 1 |
| ENSG00000113649 |  |  | 1 |
| ENSG00000186867 |  |  | 1 |
| ENSG00000127928 |  |  | 1 |
| ENSG00000106804 |  |  | 1 |
| ENSG00000127920 |  |  | 1 |
| ENSG00000173250 |  |  | 1 |
| ENSG00000168066 |  |  | 1 |
| ENSG00000102970 |  |  | 1 |
| ENSG00000205352 |  |  | 1 |
| ENSG00000174837 |  |  | 1 |
| ENSG00000147262 |  |  | 1 |
| ENSG00000198369 |  |  | 1 |
| ENSG00000171054 |  |  | 1 |
| ENSG00000169618 |  |  | 1 |
| ENSG00000139572 |  |  | 1 |
| ENSG00000162298 |  |  | 1 |





















|                 |  |  |   |
|-----------------|--|--|---|
| ENSG00000181296 |  |  | 1 |
| ENSG00000181282 |  |  | 1 |
| ENSG00000196779 |  |  | 1 |
| ENSG00000185408 |  |  | 1 |
| ENSG00000182743 |  |  | 1 |
| ENSG00000182625 |  |  | 1 |
| ENSG00000183909 |  |  | 1 |
| ENSG00000205797 |  |  | 1 |
| ENSG00000133136 |  |  | 1 |
| ENSG00000165312 |  |  | 1 |
| ENSG00000204332 |  |  | 1 |
| ENSG00000182880 |  |  | 1 |
| ENSG00000205813 |  |  | 1 |
| ENSG00000132671 |  |  | 1 |
| ENSG00000198261 |  |  | 1 |
| ENSG00000198674 |  |  | 1 |
| ENSG00000186268 |  |  | 1 |
| ENSG00000196403 |  |  | 1 |
| ENSG00000197309 |  |  | 1 |
| ENSG00000204294 |  |  | 1 |
| ENSG00000198317 |  |  | 1 |
| ENSG00000178586 |  |  | 1 |
| ENSG00000188314 |  |  | 1 |
| ENSG00000172148 |  |  | 1 |
| ENSG00000176938 |  |  | 1 |
| ENSG00000205292 |  |  | 1 |
| ENSG00000177799 |  |  | 1 |
| ENSG00000198760 |  |  | 1 |
| ENSG00000141194 |  |  | 1 |
| ENSG00000170374 |  |  | 1 |
| ENSG00000196534 |  |  | 1 |
| ENSG00000205332 |  |  | 1 |
| ENSG00000179615 |  |  | 1 |
| ENSG00000184899 |  |  | 1 |
| ENSG00000159279 |  |  | 1 |
| ENSG00000107485 |  |  | 1 |
| ENSG00000146013 |  |  | 1 |
| ENSG00000109062 |  |  | 1 |
| ENSG00000169418 |  |  | 1 |
| ENSG00000172367 |  |  | 1 |
| ENSG00000183751 |  |  | 1 |
| ENSG00000168824 |  |  | 1 |
| ENSG00000170091 |  |  | 1 |
| ENSG00000130643 |  |  | 1 |
| ENSG00000173175 |  |  | 1 |
| ENSG00000178473 |  |  | 1 |
| ENSG00000118702 |  |  | 1 |
| ENSG00000087494 |  |  | 1 |
| ENSG00000213705 |  |  | 1 |
| ENSG00000144407 |  |  | 1 |
| ENSG00000175279 |  |  | 1 |
| ENSG00000090104 |  |  | 1 |
| ENSG00000206511 |  |  | 1 |
| ENSG00000206466 |  |  | 1 |
| ENSG00000131236 |  |  | 1 |
| ENSG00000112186 |  |  | 1 |

|                 |  |  |  |   |
|-----------------|--|--|--|---|
| ENSG00000137841 |  |  |  | 1 |
| ENSG00000171777 |  |  |  | 1 |
| ENSG00000146648 |  |  |  | 1 |
| ENSG00000149527 |  |  |  | 1 |
| ENSG00000197421 |  |  |  | 1 |
| ENSG00000182621 |  |  |  | 1 |
| ENSG00000101333 |  |  |  | 1 |
| ENSG00000182378 |  |  |  | 1 |
| ENSG00000161714 |  |  |  | 1 |
| ENSG00000197943 |  |  |  | 1 |
| ENSG00000182836 |  |  |  | 1 |
| ENSG00000124181 |  |  |  | 1 |
| ENSG00000167004 |  |  |  | 1 |
| ENSG00000115556 |  |  |  | 1 |
| ENSG00000154822 |  |  |  | 1 |
| ENSG00000072818 |  |  |  | 1 |
| ENSG00000187091 |  |  |  | 1 |
| ENSG00000139151 |  |  |  | 1 |
| ENSG00000149782 |  |  |  | 1 |
| ENSG00000144824 |  |  |  | 1 |
| ENSG00000114805 |  |  |  | 1 |
| ENSG00000115896 |  |  |  | 1 |
| ENSG00000182220 |  |  |  | 1 |
| ENSG00000113441 |  |  |  | 1 |
| ENSG00000177674 |  |  |  | 1 |
| ENSG00000078369 |  |  |  | 1 |
| ENSG00000153162 |  |  |  | 1 |
| ENSG00000156113 |  |  |  | 1 |
| ENSG00000109756 |  |  |  | 1 |
| ENSG00000164258 |  |  |  | 1 |
| ENSG00000148730 |  |  |  | 1 |
| ENSG00000129467 |  |  |  | 1 |
| ENSG00000157388 |  |  |  | 1 |
| ENSG00000117602 |  |  |  | 1 |
| ENSG00000159200 |  |  |  | 1 |
| ENSG00000172348 |  |  |  | 1 |
| ENSG00000086730 |  |  |  | 1 |
| ENSG00000168970 |  |  |  | 1 |
| ENSG00000204498 |  |  |  | 1 |
| ENSG00000204496 |  |  |  | 1 |
| ENSG00000204490 |  |  |  | 1 |
| ENSG00000204487 |  |  |  | 1 |
| ENSG00000204475 |  |  |  | 1 |
| ENSG00000204469 |  |  |  | 1 |
| ENSG00000175471 |  |  |  | 1 |
| ENSG00000213658 |  |  |  | 1 |
| ENSG00000010671 |  |  |  | 1 |
| ENSG00000161896 |  |  |  | 1 |
| ENSG00000140563 |  |  |  | 1 |
| ENSG00000172071 |  |  |  | 1 |
| ENSG00000173598 |  |  |  | 1 |
| ENSG00000110931 |  |  |  | 1 |
| ENSG00000115020 |  |  |  | 1 |
| ENSG00000101082 |  |  |  | 1 |
| ENSG00000010610 |  |  |  | 1 |
| ENSG00000165025 |  |  |  | 1 |

|                 |  |  |  |   |
|-----------------|--|--|--|---|
| ENSG00000163519 |  |  |  | 1 |
| ENSG00000153563 |  |  |  | 1 |
| ENSG00000115085 |  |  |  | 1 |
| ENSG00000179639 |  |  |  | 1 |
| ENSG00000130988 |  |  |  | 1 |
| ENSG00000023516 |  |  |  | 1 |
| ENSG00000111254 |  |  |  | 1 |
| ENSG00000151320 |  |  |  | 1 |
| ENSG00000179841 |  |  |  | 1 |
| ENSG00000105127 |  |  |  | 1 |
| ENSG00000118507 |  |  |  | 1 |
| ENSG00000186009 |  |  |  | 1 |
| ENSG00000129244 |  |  |  | 1 |
| ENSG00000101892 |  |  |  | 1 |
| ENSG00000163399 |  |  |  | 1 |
| ENSG00000069849 |  |  |  | 1 |
| ENSG00000137731 |  |  |  | 1 |
| ENSG0000018625  |  |  |  | 1 |
| ENSG00000132681 |  |  |  | 1 |
| ENSG00000143153 |  |  |  | 1 |
| ENSG00000105409 |  |  |  | 1 |
| ENSG00000047936 |  |  |  | 1 |
| ENSG00000188157 |  |  |  | 1 |
| ENSG00000151466 |  |  |  | 1 |
| ENSG00000091129 |  |  |  | 1 |
| ENSG00000162572 |  |  |  | 1 |
| ENSG00000142185 |  |  |  | 1 |
| ENSG00000111319 |  |  |  | 1 |
| ENSG00000166828 |  |  |  | 1 |
| ENSG00000168447 |  |  |  | 1 |
| ENSG00000110881 |  |  |  | 1 |
| ENSG00000108684 |  |  |  | 1 |
| ENSG00000213199 |  |  |  | 1 |
| ENSG00000072182 |  |  |  | 1 |
| ENSG00000049759 |  |  |  | 1 |
| ENSG00000160183 |  |  |  | 1 |
| ENSG00000101049 |  |  |  | 1 |
| ENSG00000183873 |  |  |  | 1 |
| ENSG00000196876 |  |  |  | 1 |
| ENSG00000148408 |  |  |  | 1 |
| ENSG00000007314 |  |  |  | 1 |
| ENSG00000169432 |  |  |  | 1 |
| ENSG00000136546 |  |  |  | 1 |
| ENSG00000185313 |  |  |  | 1 |
| ENSG00000168356 |  |  |  | 1 |
| ENSG00000118762 |  |  |  | 1 |
| ENSG00000177098 |  |  |  | 1 |
| ENSG00000149575 |  |  |  | 1 |
| ENSG00000166257 |  |  |  | 1 |
| ENSG00000153253 |  |  |  | 1 |
| ENSG00000136531 |  |  |  | 1 |
| ENSG00000144285 |  |  |  | 1 |
| ENSG00000105711 |  |  |  | 1 |
| ENSG00000081248 |  |  |  | 1 |
| ENSG00000126088 |  |  |  | 1 |
| ENSG00000151239 |  |  |  | 1 |

|                 |  |  |  |     |
|-----------------|--|--|--|-----|
| ENSG00000123349 |  |  |  | 1   |
| ENSG00000177156 |  |  |  | 1   |
| ENSG00000107651 |  |  |  | 1   |
| ENSG00000118515 |  |  |  | 1   |
| ENSG00000136628 |  |  |  | 1   |
| ENSG00000177301 |  |  |  | 1   |
| ENSG00000130427 |  |  |  | 1   |
| ENSG00000106125 |  |  |  | 1   |
| ENSG00000197535 |  |  |  | 1   |
| ENSG00000206305 |  |  |  | 1   |
| ENSG00000206239 |  |  |  | 1   |
| ENSG00000196735 |  |  |  | 1   |
| ENSG00000121281 |  |  |  | 1   |
| ENSG00000138798 |  |  |  | 1   |
| ENSG00000090382 |  |  |  | 1   |
| ENSG00000115204 |  |  |  | 1   |
| ENSG00000113580 |  |  |  | 1   |
| ENSG00000110080 |  |  |  | 1   |
| ENSG00000062485 |  |  |  | 1   |
| ENSG00000198805 |  |  |  | 1   |
| ENSG00000131467 |  |  |  | 1   |
| ENSG00000104324 |  |  |  | 1   |
| ENSG00000004939 |  |  |  | 1   |
| ENSG00000206372 |  |  |  | 1   |
| ENSG00000166278 |  |  |  | 1   |
| ENSG00000204364 |  |  |  | 1   |
| ENSG00000163431 |  |  |  | 1   |
| ENSG00000176340 |  |  |  | 1   |
| ENSG00000186575 |  |  |  | 1   |
| ENSG00000078699 |  |  |  | 1   |
| ENSG00000137869 |  |  |  | 1   |
| ENSG00000172179 |  |  |  | 1   |
| ENSG00000143815 |  |  |  | 1   |
| ENSG00000083444 |  |  |  | 1   |
| ENSG00000215077 |  |  |  | 1   |
| ENSG00000112526 |  |  |  | 1   |
| ENSG00000204256 |  |  |  | 1   |
| ENSG00000131620 |  |  |  | 0.5 |
| ENSG00000100170 |  |  |  | 0.5 |
| ENSG00000080166 |  |  |  | 0.5 |
| ENSG00000173692 |  |  |  | 0.5 |
| ENSG00000175166 |  |  |  | 0.5 |
| ENSG00000140675 |  |  |  | 0.5 |
| ENSG00000131183 |  |  |  | 0.5 |
| ENSG00000151704 |  |  |  | 0.5 |
| ENSG00000080493 |  |  |  | 0.5 |
| ENSG00000164924 |  |  |  | 0.5 |
| ENSG00000143627 |  |  |  | 0.5 |
| ENSG00000108344 |  |  |  | 0.5 |
| ENSG00000126562 |  |  |  | 0.5 |
| ENSG00000197299 |  |  |  | 0.5 |
| ENSG00000081800 |  |  |  | 0.5 |
| ENSG00000196502 |  |  |  | 0.5 |
| ENSG00000165029 |  |  |  | 0.5 |
| ENSG00000127412 |  |  |  | 0.5 |
| ENSG00000091137 |  |  |  | 0.5 |

|                 |  |  |     |
|-----------------|--|--|-----|
| ENSG00000165272 |  |  | 0.5 |
| ENSG00000145217 |  |  | 0.5 |
| ENSG00000081479 |  |  | 0.5 |
| ENSG00000197711 |  |  | 0.5 |
| ENSG00000107165 |  |  | 0.5 |
| ENSG00000118972 |  |  | 0.5 |
| ENSG00000001626 |  |  | 0.5 |
| ENSG00000171124 |  |  | 0.5 |
| ENSG00000074966 |  |  | 0.5 |
| ENSG00000133216 |  |  | 0.5 |
| ENSG00000160801 |  |  | 0.5 |
| ENSG00000112936 |  |  | 0.5 |
| ENSG00000164068 |  |  | 0.5 |
| ENSG00000102174 |  |  | 0.5 |
| ENSG00000183023 |  |  | 0.5 |
| ENSG00000017427 |  |  | 0.5 |
| ENSG00000005022 |  |  | 0.5 |
| ENSG00000111348 |  |  | 0.5 |
| ENSG00000196924 |  |  | 0.5 |
| ENSG00000122585 |  |  | 0.5 |
| ENSG00000110395 |  |  | 0.5 |
| ENSG00000211448 |  |  | 0.5 |
| ENSG00000079459 |  |  | 0.5 |
| ENSG00000177706 |  |  | 0.5 |
| ENSG00000142168 |  |  | 0.5 |
| ENSG00000167748 |  |  | 0.5 |
| ENSG00000149452 |  |  | 0.5 |
| ENSG00000047410 |  |  | 0.5 |
| ENSG00000213614 |  |  | 0.5 |
| ENSG00000044012 |  |  | 0.5 |
| ENSG00000049247 |  |  | 0   |
| ENSG00000151067 |  |  | 0   |
| ENSG00000140199 |  |  | 0   |
| ENSG00000120915 |  |  | 0   |
| ENSG00000100292 |  |  | 0   |
| ENSG00000157168 |  |  | 0   |
| ENSG00000197616 |  |  | 0   |
| ENSG00000108405 |  |  | 0   |
| ENSG00000188170 |  |  | 0   |
| ENSG00000159899 |  |  | 0   |
| ENSG00000145244 |  |  | 0   |
| ENSG00000005187 |  |  | 0   |
| ENSG00000164307 |  |  | 0   |
| ENSG00000164308 |  |  | 0   |
| ENSG00000010322 |  |  | 0   |
| ENSG00000139567 |  |  | 0   |
| ENSG00000095303 |  |  | 0   |
| ENSG00000171564 |  |  | 0   |
| ENSG00000171560 |  |  | 0   |
| ENSG00000171557 |  |  | 0   |
| ENSG00000102032 |  |  | 0   |
| ENSG00000100604 |  |  | 0   |
| ENSG00000163273 |  |  | 0   |
| ENSG00000131979 |  |  | 0   |
