# Supplementary material for: Computational Analysis of Candidate Disease Genes and Variants for Salt-Sensitive Hypertension in Indigenous Southern Africans
Source: PubMed Central journal article supplement (PMC2946338; doi:10.1371/journal.pone.0012989), 2010-09-27
Supplement: pone.0012989.s004.pdf [file pone.0012989.s004.pdf]

| Supplementary data S4: Ensembl IDs, HUGO symbols and descriptions of all top candidates |         |                                                                                                                                                                                                                                                 |
|-----------------------------------------------------------------------------------------|---------|-------------------------------------------------------------------------------------------------------------------------------------------------------------------------------------------------------------------------------------------------|
| Ensembl ID                                                                              | HUGO ID | Description                                                                                                                                                                                                                                     |
| ENSG00000152266                                                                         | PTH     | Parathyroid hormone precursor (Parathyrin) (PTH) (Parathormone). [Source:Uniprot/SWISSPROT;Acc:P01270]                                                                                                                                          |
| ENSG00000144891                                                                         | AGTR1   | Type-1 angiotensin II receptor (AT1) (AT1AR) (AT1BR). [Source:Uniprot/SWISSPROT;Acc:P30556]                                                                                                                                                     |
| ENSG00000151617                                                                         | EDNRA   | Endothelin-1 receptor precursor (Endothelin A receptor) (ET-A) (hET- AR) (ETA-R). [Source:Uniprot/SWISSPROT;Acc:P25101]                                                                                                                         |
| ENSG00000135744                                                                         | AGT     | Angiotensinogen precursor (Serpine A8) [Contains: Angiotensin-1 (Angiotensin I) (Ang I); Angiotensin-2 (Angiotensin II) (Ang II); Angiotensin-3 (Angiotensin III) (Ang III) (Des-Asp[1]-angiotensin II)]. [Source:Uniprot/SWISSPROT;Acc:P01019] |
| ENSG00000143839                                                                         | REN     | Renin precursor (EC 3.4.23.15) (Angiotensinogenase). [Source:Uniprot/SWISSPROT;Acc:P00797]                                                                                                                                                      |
| ENSG00000107937                                                                         | GTPBP4  | Nucleolar GTP-binding protein 1 (Chronic renal failure gene protein) (GTP-binding protein NGB). [Source:Uniprot/SWISSPROT;Acc:Q9BZE4]                                                                                                           |
| ENSG00000138622                                                                         | HCN4    | Potassium/sodium hyperpolarization-activated cyclic nucleotide-gated channel 4. [Source:Uniprot/SWISSPROT;Acc:Q9Y3Q4]                                                                                                                           |
| ENSG00000136160                                                                         | EDNRB   | Endothelin B receptor precursor (ET-B) (Endothelin receptor Non- selective type). [Source:Uniprot/SWISSPROT;Acc:P24530]                                                                                                                         |
| ENSG00000099822                                                                         | HCN2    | Potassium/sodium hyperpolarization-activated cyclic nucleotide-gated channel 2 (Brain cyclic nucleotide-gated channel 2) (BCNG-2). [Source:Uniprot/SWISSPROT;Acc:Q9UL51]                                                                        |
| ENSG00000214274                                                                         | ANG     | Angiogenin precursor (EC 3.1.27.-) (Ribonuclease 5) (RNase 5). [Source:Uniprot/SWISSPROT;Acc:P03950]                                                                                                                                            |
| ENSG00000124721                                                                         | DNAH8   | Ciliary dynein heavy chain 8 (Axonemal beta dynein heavy chain 8). [Source:Uniprot/SWISSPROT;Acc:Q96JB1]                                                                                                                                        |
| ENSG00000175206                                                                         | NPPA    | Atrial natriuretic factor precursor (ANF) (Atrial natriuretic peptide) (ANP) (Prepronatriodilatin) (CDD-ANF) [Contains: Cardiodilatin-related peptide (CDP)]. [Source:Uniprot/SWISSPROT;Acc:P01160]                                             |
| ENSG00000129965                                                                         | INS     | Insulin precursor [Contains: Insulin B chain; Insulin A chain]. [Source:Uniprot/SWISSPROT;Acc:P01308]                                                                                                                                           |
| ENSG00000163631                                                                         | ALB     | Serum albumin precursor. [Source:Uniprot/SWISSPROT;Acc:P02768]                                                                                                                                                                                  |
| ENSG00000137992                                                                         | DBT     | Lipoamide acyltransferase component of branched-chain alpha-keto acid dehydrogenase complex                                                                                                                                                     |
| ENSG00000197956                                                                         | S100A6  | Protein S100-A6 (S100 calcium-binding protein A6) (Calcyclin) (Prolactin receptor-associated protein) (PRA) (Growth factor-inducible protein 2A9) (MLN 4). [Source:Uniprot/SWISSPROT;Acc:P06703]                                                |
| ENSG00000100359                                                                         | SGSM3   | RUN and TBC1 domain containing 3 [Source:RefSeq_peptide;Acc:NP_056520]                                                                                                                                                                          |
| ENSG00000159640                                                                         | ACE     | Angiotensin-converting enzyme                                                                                                                                                                                                                   |
| ENSG00000162711                                                                         | NLRP3   | NACHT                                                                                                                                                                                                                                           |
| ENSG00000078401                                                                         | EDN1    | Endothelin-1 precursor (Preproendothelin-1) (PPET1) [Contains: Endothelin-1 (ET-1); Big endothelin-1]. [Source:Uniprot/SWISSPROT;Acc:P05305]                                                                                                    |
