# Supplementary material for: Computational Analysis of Candidate Disease Genes and Variants for Salt-Sensitive Hypertension in Indigenous Southern Africans
Source: PubMed Central journal article supplement (PMC2946338; doi:10.1371/journal.pone.0012989), 2010-09-27

**Supplementary data File S-5:** Distribution of SNPs with significantly different allele frequencies when comparing Black South African and Caucasian populations. Each black cross represents a SNP with allele frequencies that differ at the indicated significance, between Caucasian and South African populations. Grey crosses indicate all SNPs assayed. Gene name, chromosome and position are shown along the horizontal axis; Gene exons are shown as vertical black bars.

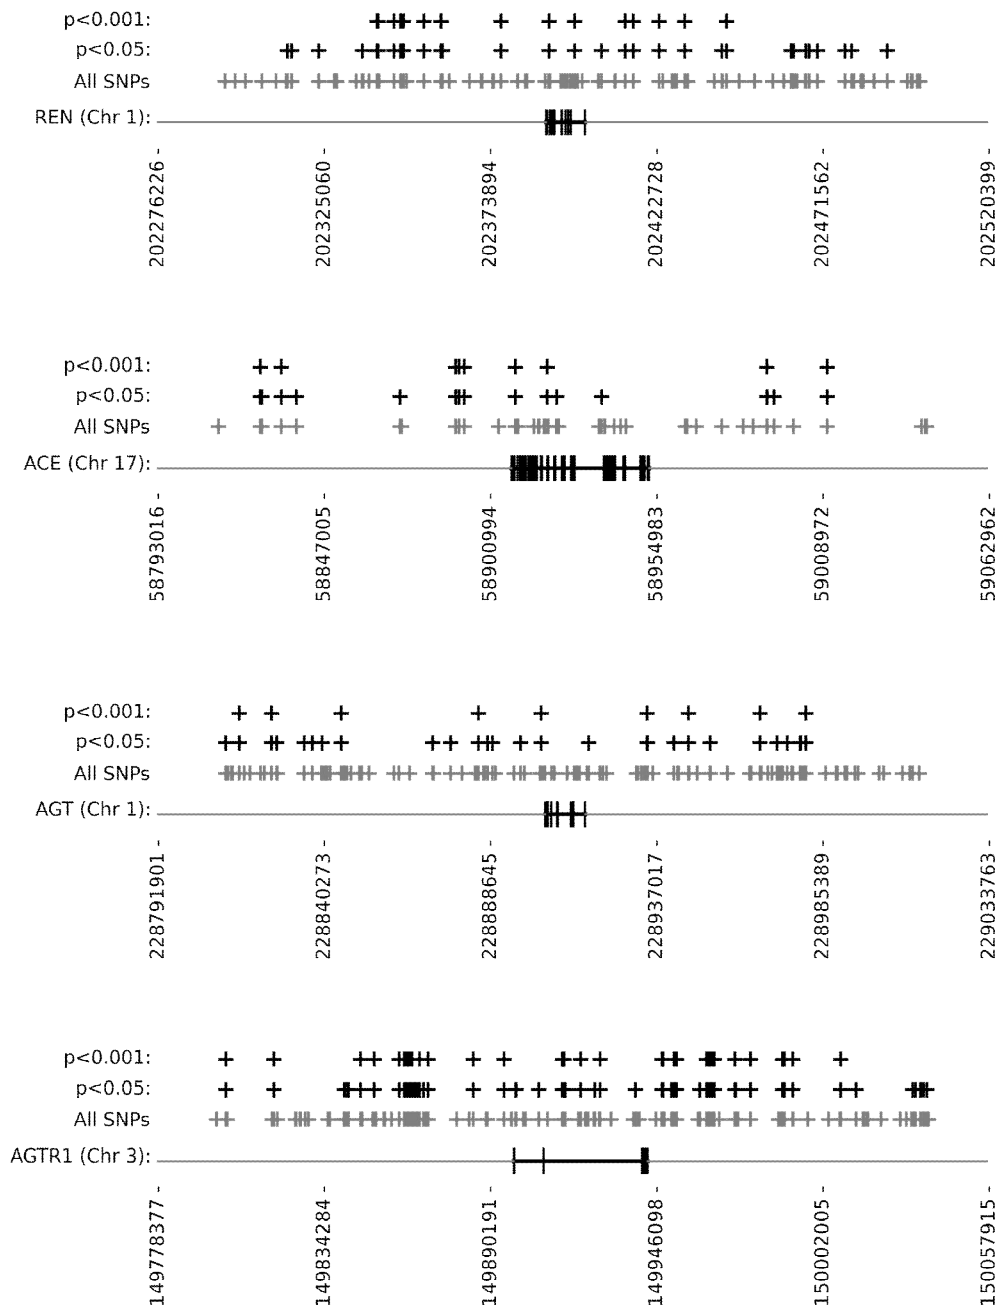

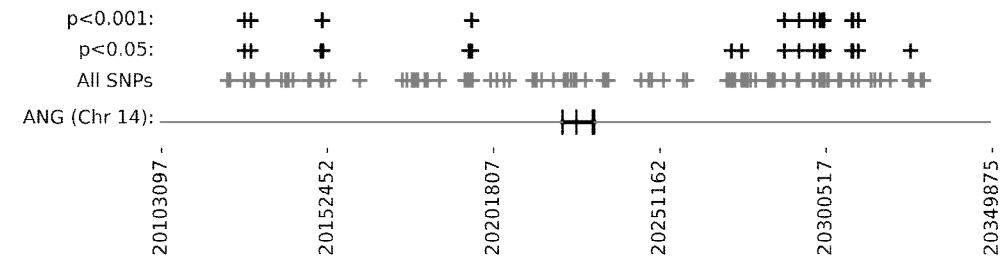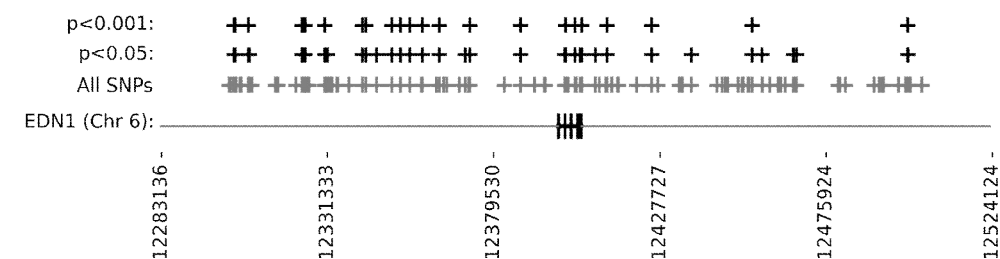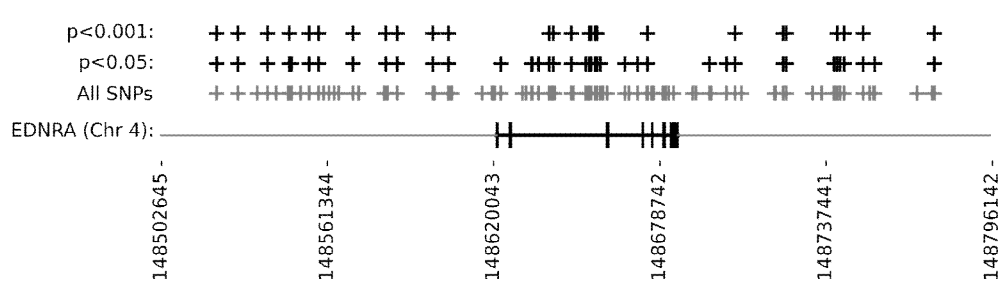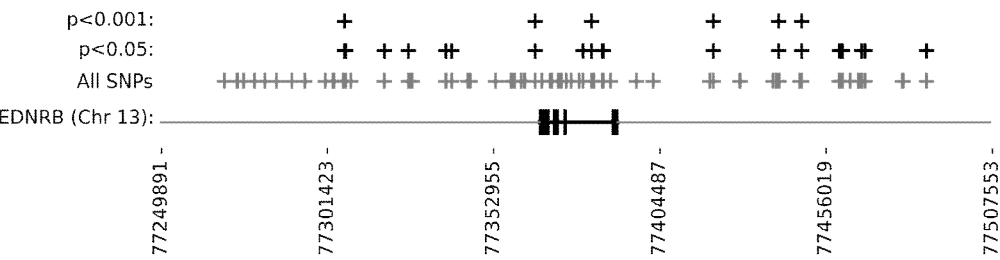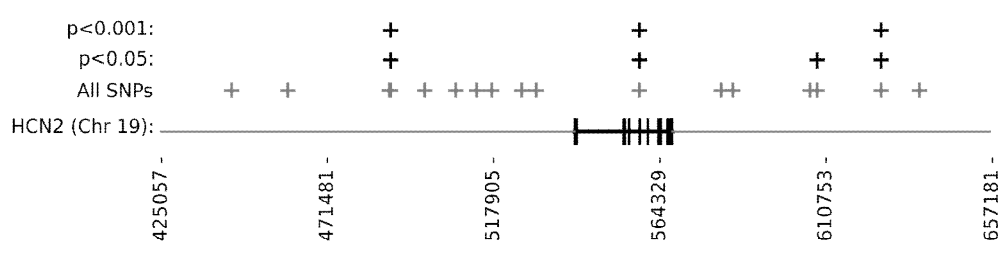

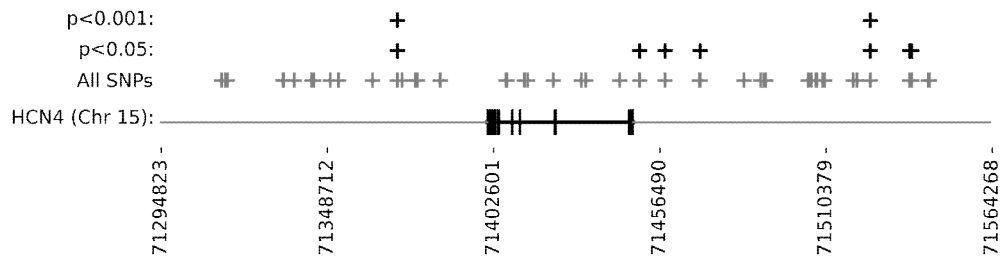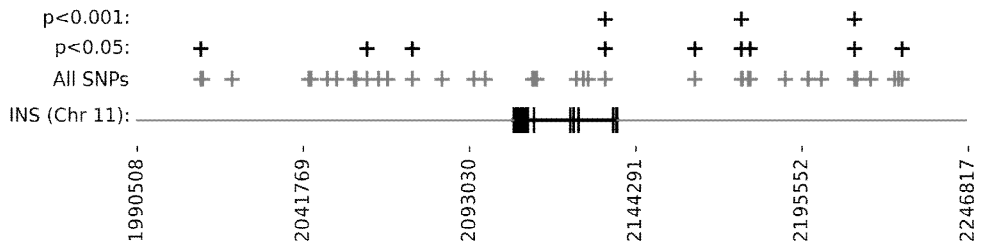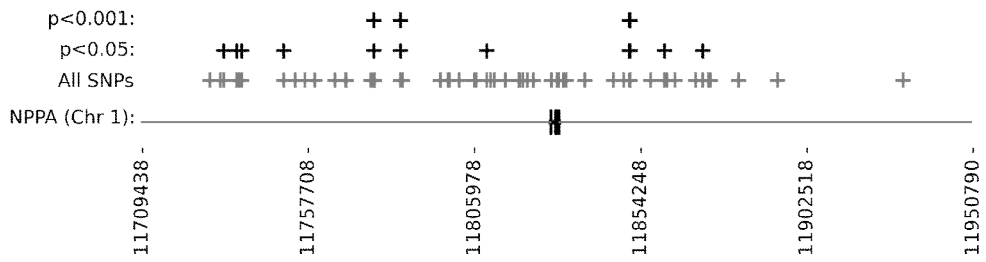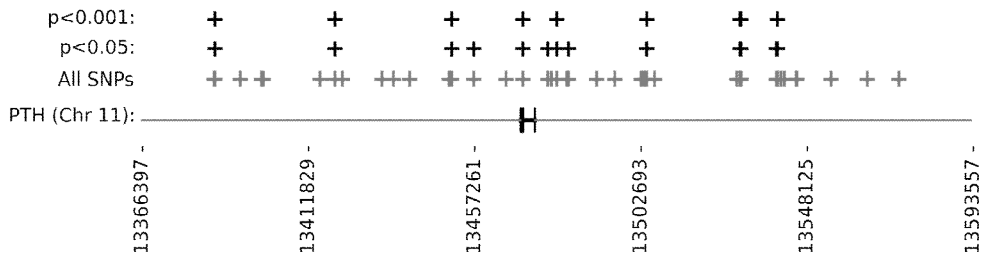

Supplement: pone.0012989.s005.pdf [file pone.0012989.s005.pdf]
